# Supplementary material for: Exploring the mechanism of prognostic genes associated with neuroendocrine differentiation and immunotherapy resistance in non-small cell lung cancer based on the bulk transcriptome and single cell RNA sequencing
Source: Research Square preprint supplement (doi:10.21203/rs.3.rs-8816614/v1), 2026-02-16
Supplement: Supplementary file 1 [file 2f7b056f9d0b8873a22100cd.xlsx]

## Sheet: stat.IC50
	drug	.y.	group1	group2	n1	n2	statistic	p	p.adj	p.signif
1	ABT737_1910	Score	High Risk	Low Risk	555	434	116185	0.34	0.415555555555556	ns
2	AGI.5198_1913	Score	High Risk	Low Risk	555	434	107838	0.00472	0.0121371428571429	**
3	AGI.6780_1634	Score	High Risk	Low Risk	555	434	109263	0.0122	0.02684	*
4	AMG.319_2045	Score	High Risk	Low Risk	555	434	113659	0.129	0.190611940298507	ns
5	AT13148_2170	Score	High Risk	Low Risk	555	434	105036	0.000552	0.0022305306122449	***
6	AZ6102_2109	Score	High Risk	Low Risk	555	434	109073	0.0108	0.0240269662921348	*
7	AZ960_1250	Score	High Risk	Low Risk	555	434	104061	0.00024	0.0011590243902439	***
8	AZD1208_1449	Score	High Risk	Low Risk	555	434	118042	0.591	0.661118644067797	ns
9	AZD1332_1463	Score	High Risk	Low Risk	555	434	113686	0.13	0.190666666666667	ns
10	AZD2014_1441	Score	High Risk	Low Risk	555	434	122288	0.678	0.737604395604396	ns
11	AZD3759_1915	Score	High Risk	Low Risk	555	434	106349	0.00158	0.005214	**
12	AZD4547_1786	Score	High Risk	Low Risk	555	434	108812	0.00913	0.0215207142857143	**
13	AZD5153_1706	Score	High Risk	Low Risk	555	434	109440	0.0136	0.0292695652173913	*
14	AZD5363_1916	Score	High Risk	Low Risk	555	434	113836	0.139	0.200890510948905	ns
15	AZD5438_1401	Score	High Risk	Low Risk	555	434	105721	0.000965	0.003474	***
16	AZD5582_1617	Score	High Risk	Low Risk	555	434	106610	0.00193	0.00616354838709677	**
17	AZD5991_1720	Score	High Risk	Low Risk	555	434	115459	0.264	0.337238709677419	ns
18	AZD6482_2169	Score	High Risk	Low Risk	555	434	131814	0.0107	0.0240269662921348	*
19	AZD6738_1917	Score	High Risk	Low Risk	555	434	95871	3.58e-08	1.3332e-06	****
20	AZD7762_1022	Score	High Risk	Low Risk	555	434	95894	3.69e-08	1.3332e-06	****
21	AZD8055_1059	Score	High Risk	Low Risk	555	434	124034	0.42	0.49207100591716	ns
22	AZD8186_1918	Score	High Risk	Low Risk	555	434	124856	0.321	0.397238	ns
23	Acetalax_1804	Score	High Risk	Low Risk	555	434	118864	0.725	0.784426229508197	ns
24	Afatinib_1032	Score	High Risk	Low Risk	555	434	120144	0.948	0.967546391752577	ns
25	Afuresertib_1912	Score	High Risk	Low Risk	555	434	118220	0.619	0.6809	ns
26	Alisertib_1051	Score	High Risk	Low Risk	555	434	102685	6.84e-05	0.000436877419354839	****
27	Alpelisib_1560	Score	High Risk	Low Risk	555	434	113394	0.114	0.174976744186047	ns
28	Axitinib_1021	Score	High Risk	Low Risk	555	434	128780	0.0612	0.108111504424779	ns
29	BDP.00009066_1866	Score	High Risk	Low Risk	555	434	106740	0.00213	0.0066825	**
30	BI.2536_1086	Score	High Risk	Low Risk	555	434	101708	2.66e-05	0.000202569230769231	****
31	BIBR.1532_2043	Score	High Risk	Low Risk	555	434	116782	0.413	0.489107142857143	ns
32	BMS.345541_1249	Score	High Risk	Low Risk	555	434	110278	0.0227	0.0440647058823529	*
33	BMS.536924_1091	Score	High Risk	Low Risk	555	434	106763	0.00216	0.0066825	**
34	BMS.754807_2171	Score	High Risk	Low Risk	555	434	136578	0.000293	0.00138128571428571	***
35	BPD.00008900_1998	Score	High Risk	Low Risk	555	434	103579	0.000156	0.000834810810810811	***
36	Bortezomib_1191	Score	High Risk	Low Risk	555	434	99552	2.81e-06	4.27984615384615e-05	****
37	Buparlisib_1873	Score	High Risk	Low Risk	555	434	106267	0.00148	0.00496677966101695	**
38	CDK9_5038_1709	Score	High Risk	Low Risk	555	434	113487	0.119	0.179862595419847	ns
39	CDK9_5576_1708	Score	High Risk	Low Risk	555	434	117613	0.527	0.606662790697674	ns
40	CZC24832_1615	Score	High Risk	Low Risk	555	434	109855	0.0176	0.0363	*
41	Camptothecin_1003	Score	High Risk	Low Risk	555	434	109906	0.0182	0.0367714285714286	*
42	Carmustine_1807	Score	High Risk	Low Risk	555	434	113516	0.121	0.180135338345865	ns
43	Cediranib_1922	Score	High Risk	Low Risk	555	434	111292	0.0403	0.075277358490566	*
44	Cisplatin_1005	Score	High Risk	Low Risk	555	434	101402	1.96e-05	0.000155232	****
45	Crizotinib_1083	Score	High Risk	Low Risk	555	434	112732	0.084	0.138272727272727	ns
46	Cyclophosphamide_1512	Score	High Risk	Low Risk	555	434	115093	0.231	0.300907894736842	ns
47	Cytarabine_1006	Score	High Risk	Low Risk	555	434	108427	0.00707	0.0174982	**
48	Dabrafenib_1373	Score	High Risk	Low Risk	555	434	106213	0.00142	0.00484758620689655	**
49	Dactinomycin_1811	Score	High Risk	Low Risk	555	434	109022	0.0105	0.0240269662921348	*
50	Dactinomycin_1911	Score	High Risk	Low Risk	555	434	107654	0.00414	0.0110088	**
51	Dactolisib_1057	Score	High Risk	Low Risk	555	434	114594	0.19	0.254189189189189	ns
52	Daporinad_1248	Score	High Risk	Low Risk	555	434	111221	0.0387	0.0729771428571429	*
53	Dasatinib_1079	Score	High Risk	Low Risk	555	434	101045	1.36e-05	0.0001224	****
54	Dihydrorotenone_1827	Score	High Risk	Low Risk	555	434	115574	0.276	0.350307692307692	ns
55	Dinaciclib_1180	Score	High Risk	Low Risk	555	434	106885	0.00237	0.00711	**
56	Docetaxel_1007	Score	High Risk	Low Risk	555	434	95231	1.57e-08	1.155e-06	****
57	Docetaxel_1819	Score	High Risk	Low Risk	555	434	96718	1.04e-07	2.94171428571429e-06	****
58	Doramapimod_1042	Score	High Risk	Low Risk	555	434	146339	6.22e-09	1.155e-06	****
59	EPZ004777_1237	Score	High Risk	Low Risk	555	434	113475	0.118	0.179723076923077	ns
60	EPZ5676_1563	Score	High Risk	Low Risk	555	434	113226	0.106	0.165259842519685	ns
61	ERK_2440_1713	Score	High Risk	Low Risk	555	434	111396	0.0426	0.0788299065420561	*
62	ERK_6604_1714	Score	High Risk	Low Risk	555	434	104011	0.000229	0.00113355	***
63	Eg5_9814_1712	Score	High Risk	Low Risk	555	434	107420	0.00351	0.00992828571428572	**
64	Elephantin_1835	Score	High Risk	Low Risk	555	434	120426	0.998	0.999	ns
65	Entinostat_1593	Score	High Risk	Low Risk	555	434	104781	0.000446	0.00183975	***
66	Entospletinib_1630	Score	High Risk	Low Risk	555	434	116663	0.398	0.478301204819277	ns
67	Epirubicin_1511	Score	High Risk	Low Risk	555	434	109633	0.0154	0.0324382978723404	*
68	Erlotinib_1168	Score	High Risk	Low Risk	555	434	104686	0.000411	0.00173144680851064	***
69	Fludarabine_1813	Score	High Risk	Low Risk	555	434	107663	0.00417	0.0110088	**
70	Foretinib_2040	Score	High Risk	Low Risk	555	434	107594	0.00397	0.0109175	**
71	Fulvestrant_1200	Score	High Risk	Low Risk	555	434	114247	0.165	0.226875	ns
72	Fulvestrant_1816	Score	High Risk	Low Risk	555	434	110847	0.0315	0.0599711538461538	*
73	GDC0810_1925	Score	High Risk	Low Risk	555	434	100822	1.08e-05	0.00010692	****
74	GNE.317_1926	Score	High Risk	Low Risk	555	434	117914	0.572	0.6435	ns
75	GSK1904529A_1093	Score	High Risk	Low Risk	555	434	110199	0.0217	0.0425405940594059	*
76	GSK2578215A_1927	Score	High Risk	Low Risk	555	434	105625	0.000893	0.00333611320754717	***
77	GSK2606414_1618	Score	High Risk	Low Risk	555	434	112360	0.0701	0.117625423728814	ns
78	GSK269962A_1192	Score	High Risk	Low Risk	555	434	136296	0.000374	0.0016456	***
79	GSK343_1627	Score	High Risk	Low Risk	555	434	114582	0.189	0.254189189189189	ns
80	GSK591_2110	Score	High Risk	Low Risk	555	434	107647	0.00412	0.0110088	**
81	Gallibiscoquinazole_1830	Score	High Risk	Low Risk	555	434	110158	0.0211	0.041778	*
82	Gefitinib_1010	Score	High Risk	Low Risk	555	434	109033	0.0105	0.0240269662921348	*
83	Gemcitabine_1190	Score	High Risk	Low Risk	555	434	104642	0.000396	0.00170452173913043	***
84	I.BET.762_1624	Score	High Risk	Low Risk	555	434	99764	3.54e-06	4.566375e-05	****
85	I.BRD9_1928	Score	High Risk	Low Risk	555	434	112837	0.0883	0.143306557377049	ns
86	IAP_5620_1428	Score	High Risk	Low Risk	555	434	106185	0.00139	0.00482842105263158	**
87	IGF1R_3801_1738	Score	High Risk	Low Risk	555	434	102938	8.68e-05	0.000525	****
88	IRAK4_4710_1716	Score	High Risk	Low Risk	555	434	108537	0.00761	0.0186022222222222	**
89	IWP.2_1576	Score	High Risk	Low Risk	555	434	107459	0.00361	0.010067323943662	**
90	Ibrutinib_1799	Score	High Risk	Low Risk	555	434	116803	0.415	0.489107142857143	ns
91	Ipatasertib_1924	Score	High Risk	Low Risk	555	434	120800	0.935	0.959222797927461	ns
92	Irinotecan_1088	Score	High Risk	Low Risk	555	434	112106	0.0617	0.108111504424779	ns
93	JAK1_8709_1718	Score	High Risk	Low Risk	555	434	121739	0.77	0.819677419354839	ns
94	JAK_8517_1739	Score	High Risk	Low Risk	555	434	112970	0.094	0.147714285714286	ns
95	JQ1_2172	Score	High Risk	Low Risk	555	434	132138	0.00866	0.0208973493975904	**
96	KRAS..G12C..Inhibitor.12_1855	Score	High Risk	Low Risk	555	434	121552	0.802	0.840190476190476	ns
97	KU.55933_1030	Score	High Risk	Low Risk	555	434	114123	0.157	0.22030985915493	ns
98	LCL161_1557	Score	High Risk	Low Risk	555	434	105454	0.000778	0.00296238461538462	***
99	LGK974_1598	Score	High Risk	Low Risk	555	434	116537	0.382	0.464024539877301	ns
100	LJI308_2107	Score	High Risk	Low Risk	555	434	106550	0.00184	0.00597245901639344	**
101	LY2109761_1852	Score	High Risk	Low Risk	555	434	122354	0.667	0.729646408839779	ns
102	Lapatinib_1558	Score	High Risk	Low Risk	555	434	108129	0.00577	0.0144615189873418	**
103	Leflunomide_1578	Score	High Risk	Low Risk	555	434	114809	0.207	0.271430463576159	ns
104	Linsitinib_1510	Score	High Risk	Low Risk	555	434	118081	0.598	0.665191011235955	ns
105	Luminespib_1559	Score	High Risk	Low Risk	555	434	103114	0.000102	0.000594	***
106	MG.132_1862	Score	High Risk	Low Risk	555	434	101294	1.76e-05	0.000147675	****
107	MIM1_1996	Score	High Risk	Low Risk	555	434	99245	2e-06	3.3e-05	****
108	MIRA.1_1931	Score	High Risk	Low Risk	555	434	115985	0.318	0.396	ns
109	MK.1775_1179	Score	High Risk	Low Risk	555	434	95315	1.75e-08	1.155e-06	****
110	MK.2206_1053	Score	High Risk	Low Risk	555	434	126257	0.192	0.255140939597315	ns
111	MK.8776_2046	Score	High Risk	Low Risk	555	434	100193	5.61e-06	6.171e-05	****
112	ML323_1629	Score	High Risk	Low Risk	555	434	111702	0.0501	0.09018	ns
113	MN.64_1854	Score	High Risk	Low Risk	555	434	114061	0.153	0.216385714285714	ns
114	Mirin_1048	Score	High Risk	Low Risk	555	434	107385	0.00342	0.00981391304347826	**
115	Mitoxantrone_1810	Score	High Risk	Low Risk	555	434	114770	0.204	0.26928	ns
116	NU7441_1038	Score	High Risk	Low Risk	555	434	120422	0.998	0.999	ns
117	NVP.ADW742_1932	Score	High Risk	Low Risk	555	434	113918	0.144	0.206608695652174	ns
118	Navitoclax_1011	Score	High Risk	Low Risk	555	434	117897	0.569	0.6435	ns
119	Nelarabine_1814	Score	High Risk	Low Risk	555	434	117667	0.535	0.612312138728324	ns
120	Nilotinib_1013	Score	High Risk	Low Risk	555	434	115117	0.233	0.301529411764706	ns
121	Niraparib_1177	Score	High Risk	Low Risk	555	434	123835	0.446	0.516421052631579	ns
122	Nutlin.3a...._1047	Score	High Risk	Low Risk	555	434	128732	0.0627	0.1089	ns
123	OF.1_1853	Score	High Risk	Low Risk	555	434	120899	0.917	0.950607329842932	ns
124	OSI.027_1594	Score	High Risk	Low Risk	555	434	104006	0.000228	0.00113355	***
125	OTX015_1626	Score	High Risk	Low Risk	555	434	103961	0.000219	0.00113355	***
126	Obatoclax.Mesylate_1068	Score	High Risk	Low Risk	555	434	95965	4.04e-08	1.3332e-06	****
127	Olaparib_1017	Score	High Risk	Low Risk	555	434	113270	0.108	0.167063	ns
128	Osimertinib_1919	Score	High Risk	Low Risk	555	434	120430	0.999	0.999	ns
129	Oxaliplatin_1089	Score	High Risk	Low Risk	555	434	113512	0.12	0.18	ns
130	Oxaliplatin_1806	Score	High Risk	Low Risk	555	434	119563	0.845	0.880578947368421	ns
131	P22077_1933	Score	High Risk	Low Risk	555	434	116963	0.436	0.507811764705882	ns
132	PAK_5339_1730	Score	High Risk	Low Risk	555	434	115759	0.294	0.370777070063694	ns
133	PCI.34051_1621	Score	High Risk	Low Risk	555	434	122704	0.611	0.675854748603352	ns
134	PD0325901_1060	Score	High Risk	Low Risk	555	434	112965	0.0938	0.147714285714286	ns
135	PD173074_1049	Score	High Risk	Low Risk	555	434	116675	0.399	0.478301204819277	ns
136	PF.4708671_1129	Score	High Risk	Low Risk	555	434	136506	0.000312	0.0014366511627907	***
137	PFI3_1620	Score	High Risk	Low Risk	555	434	110043	0.0197	0.0394	*
138	PLX.4720_1036	Score	High Risk	Low Risk	555	434	112257	0.0666	0.113679310344828	ns
139	PRIMA.1MET_1131	Score	High Risk	Low Risk	555	434	124183	0.401	0.478301204819277	ns
140	PRT062607_1631	Score	High Risk	Low Risk	555	434	121637	0.788	0.834352941176471	ns
141	Paclitaxel_1080	Score	High Risk	Low Risk	555	434	100752	1.01e-05	0.000105252631578947	****
142	Palbociclib_1054	Score	High Risk	Low Risk	555	434	120428	0.999	0.999	ns
143	Pevonedistat_1529	Score	High Risk	Low Risk	555	434	99803	3.69e-06	4.566375e-05	****
144	Picolinici.acid_1635	Score	High Risk	Low Risk	555	434	109565	0.0148	0.0315096774193548	*
145	Pictilisib_1058	Score	High Risk	Low Risk	555	434	114144	0.158	0.22030985915493	ns
146	Podophyllotoxin.bromide_1825	Score	High Risk	Low Risk	555	434	99916	4.17e-06	4.85682352941176e-05	****
147	Pyridostatin_2044	Score	High Risk	Low Risk	555	434	111465	0.0442	0.0810333333333333	*
148	RO.3306_1052	Score	High Risk	Low Risk	555	434	125567	0.25	0.321428571428571	ns
149	RVX.208_1625	Score	High Risk	Low Risk	555	434	105294	0.000683	0.00265164705882353	***
150	Rapamycin_1084	Score	High Risk	Low Risk	555	434	110659	0.0283	0.0544019417475728	*
151	Ribociclib_1632	Score	High Risk	Low Risk	555	434	131135	0.0164	0.0341810526315789	*
152	Ruxolitinib_1507	Score	High Risk	Low Risk	555	434	109333	0.0128	0.0278505494505495	*
153	SB216763_1025	Score	High Risk	Low Risk	555	434	126633	0.164	0.226875	ns
154	SB505124_1194	Score	High Risk	Low Risk	555	434	134899	0.00118	0.00417214285714286	**
155	SCH772984_1564	Score	High Risk	Low Risk	555	434	106950	0.00249	0.00735850746268657	**
156	Sabutoclax_1849	Score	High Risk	Low Risk	555	434	112969	0.094	0.147714285714286	ns
157	Sapitinib_1549	Score	High Risk	Low Risk	555	434	114011	0.15	0.213669064748201	ns
158	Savolitinib_1936	Score	High Risk	Low Risk	555	434	97815	3.89e-07	9.62775e-06	****
159	Selumetinib_1736	Score	High Risk	Low Risk	555	434	120003	0.923	0.951844	ns
160	Sepantronium.bromide_1941	Score	High Risk	Low Risk	555	434	112082	0.061	0.108111504424779	ns
161	Sinularin_1838	Score	High Risk	Low Risk	555	434	124979	0.308	0.385974683544304	ns
162	Sorafenib_1085	Score	High Risk	Low Risk	555	434	114471	0.181	0.245465753424658	ns
163	Staurosporine_1034	Score	High Risk	Low Risk	555	434	103351	0.000127	0.0006985	***
164	TAF1_5496_1732	Score	High Risk	Low Risk	555	434	121568	0.799	0.840190476190476	ns
165	Talazoparib_1259	Score	High Risk	Low Risk	555	434	113800	0.137	0.199455882352941	ns
166	Tamoxifen_1199	Score	High Risk	Low Risk	555	434	105185	0.000624	0.00247104	***
167	Taselisib_1561	Score	High Risk	Low Risk	555	434	116038	0.324	0.398459627329193	ns
168	Telomerase.Inhibitor.IX_1930	Score	High Risk	Low Risk	555	434	103294	0.000121	0.000684514285714286	***
169	Temozolomide_1375	Score	High Risk	Low Risk	555	434	107936	0.00505	0.0128192307692308	**
170	Teniposide_1809	Score	High Risk	Low Risk	555	434	106801	0.00223	0.00679292307692308	**
171	Topotecan_1808	Score	High Risk	Low Risk	555	434	114301	0.169	0.230772413793103	ns
172	Tozasertib_1096	Score	High Risk	Low Risk	555	434	112217	0.0653	0.112429565217391	ns
173	Trametinib_1372	Score	High Risk	Low Risk	555	434	111693	0.0499	0.09018	*
174	ULK1_4989_1733	Score	High Risk	Low Risk	555	434	102098	3.9e-05	0.000275785714285714	****
175	UMI.77_1939	Score	High Risk	Low Risk	555	434	102279	4.65e-05	0.00031152	****
176	Ulixertinib_1908	Score	High Risk	Low Risk	555	434	109063	0.0107	0.0240269662921348	*
177	Ulixertinib_2047	Score	High Risk	Low Risk	555	434	109876	0.0179	0.0365381443298969	*
178	Uprosertib_1553	Score	High Risk	Low Risk	555	434	121950	0.734	0.789847826086956	ns
179	Uprosertib_2106	Score	High Risk	Low Risk	555	434	112745	0.0845	0.138272727272727	ns
180	VE.822_1613	Score	High Risk	Low Risk	555	434	102947	8.75e-05	0.000525	****
181	VE821_2111	Score	High Risk	Low Risk	555	434	98427	7.94e-07	1.7468e-05	****
182	VSP34_8731_1734	Score	High Risk	Low Risk	555	434	112296	0.0679	0.114907692307692	ns
183	VX.11e_2096	Score	High Risk	Low Risk	555	434	101313	1.79e-05	0.000147675	****
184	Venetoclax_1909	Score	High Risk	Low Risk	555	434	107719	0.00434	0.0113068421052632	**
185	Vinblastine_1004	Score	High Risk	Low Risk	555	434	102295	4.72e-05	0.00031152	****
186	Vincristine_1818	Score	High Risk	Low Risk	555	434	102070	3.79e-05	0.000275785714285714	****
187	Vinorelbine_2048	Score	High Risk	Low Risk	555	434	98859	1.3e-06	2.34e-05	****
188	Vorinostat_1012	Score	High Risk	Low Risk	555	434	112953	0.0933	0.147714285714286	ns
189	WEHI.539_1997	Score	High Risk	Low Risk	555	434	107276	0.00316	0.00920117647058824	**
190	WIKI4_1940	Score	High Risk	Low Risk	555	434	104575	0.000374	0.0016456	***
191	WZ4003_1614	Score	High Risk	Low Risk	555	434	108749	0.00876	0.0208973493975904	**
192	Wee1.Inhibitor_1046	Score	High Risk	Low Risk	555	434	99662	3.16e-06	4.46914285714286e-05	****
193	Wnt.C59_1622	Score	High Risk	Low Risk	555	434	112380	0.0708	0.117801680672269	ns
194	X5.Fluorouracil_1073	Score	High Risk	Low Risk	555	434	100945	1.23e-05	0.000115971428571429	****
195	XAV939_1268	Score	High Risk	Low Risk	555	434	105648	0.00091	0.00333666666666667	***
196	YK.4.279_1239	Score	High Risk	Low Risk	555	434	98794	1.21e-06	2.34e-05	****
197	ZM447439_1050	Score	High Risk	Low Risk	555	434	121790	0.761	0.814475675675676	ns
198	Zoledronate_1802	Score	High Risk	Low Risk	555	434	117773	0.55	0.625862068965517	ns
