# Supplementary material for: Exploring the mechanism of prognostic genes associated with neuroendocrine differentiation and immunotherapy resistance in non-small cell lung cancer based on the bulk transcriptome and single cell RNA sequencing
Source: Research Square preprint supplement (doi:10.21203/rs.3.rs-8816614/v1), 2026-02-16
Supplement: Supplementary file 2 [file 5862dc90b244b178a360e49d.xlsx]

## Sheet: GO_res
	ONTOLOGY	ID	Description	BgRatio	pvalue	p.adjust	qvalue	geneID	Count	richFactor
GO:0006260	BP	GO:0006260	DNA replication	278/18870	0.00081089875872748	0.113280274828851	0.0744565186668501	CDC7/RNASEH2A/RRM2	3	0.0107913669064748
GO:1901992	BP	GO:1901992	positive regulation of mitotic cell cycle phase transition	98/18870	0.00200618603268472	0.113280274828851	0.0744565186668501	CDC7/RRM2	2	0.0204081632653061
GO:1901989	BP	GO:1901989	positive regulation of cell cycle phase transition	119/18870	0.00293941223322733	0.113280274828851	0.0744565186668501	CDC7/RRM2	2	0.0168067226890756
GO:1901987	BP	GO:1901987	regulation of cell cycle phase transition	456/18870	0.00334703729620927	0.113280274828851	0.0744565186668501	CDC7/WDR76/RRM2	3	0.00657894736842105
GO:0045931	BP	GO:0045931	positive regulation of mitotic cell cycle	128/18870	0.00339099777187499	0.113280274828851	0.0744565186668501	CDC7/RRM2	2	0.015625
GO:0070142	BP	GO:0070142	synaptic vesicle budding	10/18870	0.00686955691913194	0.113280274828851	0.0744565186668501	SNAP91	1	0.1
GO:1905150	BP	GO:1905150	regulation of voltage-gated sodium channel activity	10/18870	0.00686955691913194	0.113280274828851	0.0744565186668501	FGF14	1	0.1
GO:0006734	BP	GO:0006734	NADH metabolic process	11/18870	0.00755411130725814	0.113280274828851	0.0744565186668501	MDH2	1	0.0909090909090909
GO:0106072	BP	GO:0106072	negative regulation of adenylate cyclase-activating G protein-coupled receptor signaling pathway	11/18870	0.00755411130725814	0.113280274828851	0.0744565186668501	MRAP2	1	0.0909090909090909
GO:0000727	BP	GO:0000727	double-strand break repair via break-induced replication	12/18870	0.00823823011276237	0.113280274828851	0.0744565186668501	CDC7	1	0.0833333333333333
GO:0033262	BP	GO:0033262	regulation of nuclear cell cycle DNA replication	13/18870	0.00892191358972372	0.113280274828851	0.0744565186668501	CDC7	1	0.0769230769230769
GO:2000105	BP	GO:2000105	positive regulation of DNA-templated DNA replication	13/18870	0.00892191358972372	0.113280274828851	0.0744565186668501	CDC7	1	0.0769230769230769
GO:0106070	BP	GO:0106070	regulation of adenylate cyclase-activating G protein-coupled receptor signaling pathway	14/18870	0.00960516199208528	0.113280274828851	0.0744565186668501	MRAP2	1	0.0714285714285714
GO:0009263	BP	GO:0009263	deoxyribonucleotide biosynthetic process	15/18870	0.0102879755736561	0.113280274828851	0.0744565186668501	RRM2	1	0.0666666666666667
GO:0009265	BP	GO:0009265	2'-deoxyribonucleotide biosynthetic process	15/18870	0.0102879755736561	0.113280274828851	0.0744565186668501	RRM2	1	0.0666666666666667
GO:0016322	BP	GO:0016322	neuron remodeling	15/18870	0.0102879755736561	0.113280274828851	0.0744565186668501	NTN4	1	0.0666666666666667
GO:0046385	BP	GO:0046385	deoxyribose phosphate biosynthetic process	15/18870	0.0102879755736561	0.113280274828851	0.0744565186668501	RRM2	1	0.0666666666666667
GO:0051290	BP	GO:0051290	protein heterotetramerization	15/18870	0.0102879755736561	0.113280274828851	0.0744565186668501	RRM2	1	0.0666666666666667
GO:0048268	BP	GO:0048268	clathrin coat assembly	17/18870	0.0116522992889888	0.113280274828851	0.0744565186668501	SNAP91	1	0.0588235294117647
GO:0097067	BP	GO:0097067	cellular response to thyroid hormone stimulus	17/18870	0.0116522992889888	0.113280274828851	0.0744565186668501	KLF9	1	0.0588235294117647
GO:2000369	BP	GO:2000369	regulation of clathrin-dependent endocytosis	18/18870	0.0123338099296955	0.113280274828851	0.0744565186668501	SNAP91	1	0.0555555555555556
GO:0000082	BP	GO:0000082	G1/S transition of mitotic cell cycle	252/18870	0.0125745342998828	0.113280274828851	0.0744565186668501	CDC7/RRM2	2	0.00793650793650794
GO:0090068	BP	GO:0090068	positive regulation of cell cycle process	262/18870	0.0135417723766906	0.113280274828851	0.0744565186668501	CDC7/RRM2	2	0.00763358778625954
GO:0060445	BP	GO:0060445	branching involved in salivary gland morphogenesis	21/18870	0.0143757400228243	0.113280274828851	0.0744565186668501	NTN4	1	0.0476190476190476
GO:0044843	BP	GO:0044843	cell cycle G1/S phase transition	279/18870	0.0152588028297977	0.113280274828851	0.0744565186668501	CDC7/RRM2	2	0.00716845878136201
GO:0010839	BP	GO:0010839	negative regulation of keratinocyte proliferation	24/18870	0.0164137726841034	0.113280274828851	0.0744565186668501	KLF9	1	0.0416666666666667
GO:2000001	BP	GO:2000001	regulation of DNA damage checkpoint	24/18870	0.0164137726841034	0.113280274828851	0.0744565186668501	WDR76	1	0.0416666666666667
GO:0045745	BP	GO:0045745	positive regulation of G protein-coupled receptor signaling pathway	27/18870	0.0184479147337263	0.113280274828851	0.0744565186668501	MRAP2	1	0.037037037037037
GO:0051291	BP	GO:0051291	protein heterooligomerization	28/18870	0.0191250986804683	0.113280274828851	0.0744565186668501	RRM2	1	0.0357142857142857
GO:1903077	BP	GO:1903077	negative regulation of protein localization to plasma membrane	28/18870	0.0191250986804683	0.113280274828851	0.0744565186668501	MRAP2	1	0.0357142857142857
GO:0010971	BP	GO:0010971	positive regulation of G2/M transition of mitotic cell cycle	29/18870	0.0198018513456395	0.113280274828851	0.0744565186668501	CDC7	1	0.0344827586206897
GO:0097066	BP	GO:0097066	response to thyroid hormone	29/18870	0.0198018513456395	0.113280274828851	0.0744565186668501	KLF9	1	0.0344827586206897
GO:0009185	BP	GO:0009185	ribonucleoside diphosphate metabolic process	30/18870	0.0204781729810362	0.113280274828851	0.0744565186668501	RRM2	1	0.0333333333333333
GO:1904376	BP	GO:1904376	negative regulation of protein localization to cell periphery	30/18870	0.0204781729810362	0.113280274828851	0.0744565186668501	MRAP2	1	0.0333333333333333
GO:0045787	BP	GO:0045787	positive regulation of cell cycle	334/18870	0.0214193292574309	0.113280274828851	0.0744565186668501	CDC7/RRM2	2	0.00598802395209581
GO:0015980	BP	GO:0015980	energy derivation by oxidation of organic compounds	337/18870	0.0217810911263187	0.113280274828851	0.0744565186668501	MRAP2/MDH2	2	0.00593471810089021
GO:0007435	BP	GO:0007435	salivary gland morphogenesis	32/18870	0.0218295241690234	0.113280274828851	0.0744565186668501	NTN4	1	0.03125
GO:1902751	BP	GO:1902751	positive regulation of cell cycle G2/M phase transition	32/18870	0.0218295241690234	0.113280274828851	0.0744565186668501	CDC7	1	0.03125
GO:0006099	BP	GO:0006099	tricarboxylic acid cycle	33/18870	0.0225045542245388	0.113280274828851	0.0744565186668501	MDH2	1	0.0303030303030303
GO:0007431	BP	GO:0007431	salivary gland development	34/18870	0.0231791542561296	0.113280274828851	0.0744565186668501	NTN4	1	0.0294117647058824
GO:0006298	BP	GO:0006298	mismatch repair	35/18870	0.0238533245149254	0.113280274828851	0.0744565186668501	RNASEH2A	1	0.0285714285714286
GO:1901990	BP	GO:1901990	regulation of mitotic cell cycle phase transition	355/18870	0.0240056894072981	0.113280274828851	0.0744565186668501	CDC7/RRM2	2	0.00563380281690141
GO:0071711	BP	GO:0071711	basement membrane organization	36/18870	0.0245270652519209	0.113280274828851	0.0744565186668501	NTN4	1	0.0277777777777778
GO:0009132	BP	GO:0009132	nucleoside diphosphate metabolic process	37/18870	0.0252003767179781	0.113280274828851	0.0744565186668501	RRM2	1	0.027027027027027
GO:1905476	BP	GO:1905476	negative regulation of protein localization to membrane	37/18870	0.0252003767179781	0.113280274828851	0.0744565186668501	MRAP2	1	0.027027027027027
GO:0045740	BP	GO:0045740	positive regulation of DNA replication	38/18870	0.025873259163827	0.113280274828851	0.0744565186668501	CDC7	1	0.0263157894736842
GO:0033260	BP	GO:0033260	nuclear DNA replication	40/18870	0.0272177379971478	0.113280274828851	0.0744565186668501	CDC7	1	0.025
GO:0048489	BP	GO:0048489	synaptic vesicle transport	40/18870	0.0272177379971478	0.113280274828851	0.0744565186668501	SNAP91	1	0.025
GO:0009394	BP	GO:0009394	2'-deoxyribonucleotide metabolic process	42/18870	0.0285605037550551	0.113280274828851	0.0744565186668501	RRM2	1	0.0238095238095238
GO:0019674	BP	GO:0019674	NAD metabolic process	42/18870	0.0285605037550551	0.113280274828851	0.0744565186668501	MDH2	1	0.0238095238095238
GO:0009262	BP	GO:0009262	deoxyribonucleotide metabolic process	43/18870	0.0292312448561381	0.113280274828851	0.0744565186668501	RRM2	1	0.0232558139534884
GO:0019692	BP	GO:0019692	deoxyribose phosphate metabolic process	43/18870	0.0292312448561381	0.113280274828851	0.0744565186668501	RRM2	1	0.0232558139534884
GO:0030835	BP	GO:0030835	negative regulation of actin filament depolymerization	44/18870	0.0299015584385923	0.113280274828851	0.0744565186668501	PLEKHH2	1	0.0227272727272727
GO:0044786	BP	GO:0044786	cell cycle DNA replication	44/18870	0.0299015584385923	0.113280274828851	0.0744565186668501	CDC7	1	0.0227272727272727
GO:0035272	BP	GO:0035272	exocrine system development	46/18870	0.031240904046678	0.113280274828851	0.0744565186668501	NTN4	1	0.0217391304347826
GO:0085029	BP	GO:0085029	extracellular matrix assembly	46/18870	0.031240904046678	0.113280274828851	0.0744565186668501	NTN4	1	0.0217391304347826
GO:1901976	BP	GO:1901976	regulation of cell cycle checkpoint	46/18870	0.031240904046678	0.113280274828851	0.0744565186668501	WDR76	1	0.0217391304347826
GO:0010837	BP	GO:0010837	regulation of keratinocyte proliferation	47/18870	0.0319099365715072	0.113280274828851	0.0744565186668501	KLF9	1	0.0212765957446809
GO:0072583	BP	GO:0072583	clathrin-dependent endocytosis	47/18870	0.0319099365715072	0.113280274828851	0.0744565186668501	SNAP91	1	0.0212765957446809
GO:0090329	BP	GO:0090329	regulation of DNA-templated DNA replication	47/18870	0.0319099365715072	0.113280274828851	0.0744565186668501	CDC7	1	0.0212765957446809
GO:0042551	BP	GO:0042551	neuron maturation	48/18870	0.0325785425761066	0.113757861782143	0.0747704255845069	NTN4	1	0.0208333333333333
GO:0071385	BP	GO:0071385	cellular response to glucocorticoid stimulus	50/18870	0.0339144760215532	0.114585341013125	0.0753143086471242	KLF9	1	0.02
GO:2000649	BP	GO:2000649	regulation of sodium ion transmembrane transporter activity	50/18870	0.0339144760215532	0.114585341013125	0.0753143086471242	FGF14	1	0.02
GO:0060688	BP	GO:0060688	regulation of morphogenesis of a branching structure	52/18870	0.0352487063755723	0.114585341013125	0.0753143086471242	NTN4	1	0.0192307692307692
GO:1900087	BP	GO:1900087	positive regulation of G1/S transition of mitotic cell cycle	52/18870	0.0352487063755723	0.114585341013125	0.0753143086471242	RRM2	1	0.0192307692307692
GO:0030834	BP	GO:0030834	regulation of actin filament depolymerization	53/18870	0.035915183515392	0.114585341013125	0.0753143086471242	PLEKHH2	1	0.0188679245283019
GO:0045744	BP	GO:0045744	negative regulation of G protein-coupled receptor signaling pathway	54/18870	0.0365812356286032	0.114585341013125	0.0753143086471242	MRAP2	1	0.0185185185185185
GO:0097479	BP	GO:0097479	synaptic vesicle localization	54/18870	0.0365812356286032	0.114585341013125	0.0753143086471242	SNAP91	1	0.0185185185185185
GO:0030042	BP	GO:0030042	actin filament depolymerization	58/18870	0.0392411987828772	0.118371501471146	0.0778028648167157	PLEKHH2	1	0.0172413793103448
GO:0043616	BP	GO:0043616	keratinocyte proliferation	59/18870	0.0399051294875247	0.118371501471146	0.0778028648167157	KLF9	1	0.0169491525423729
GO:0044772	BP	GO:0044772	mitotic cell cycle phase transition	470/18870	0.0402740084230859	0.118371501471146	0.0778028648167157	CDC7/RRM2	2	0.00425531914893617
GO:0071384	BP	GO:0071384	cellular response to corticosteroid stimulus	60/18870	0.0405686366544303	0.118371501471146	0.0778028648167157	KLF9	1	0.0166666666666667
GO:1902305	BP	GO:1902305	regulation of sodium ion transmembrane transport	60/18870	0.0405686366544303	0.118371501471146	0.0778028648167157	FGF14	1	0.0166666666666667
GO:1902808	BP	GO:1902808	positive regulation of cell cycle G1/S phase transition	65/18870	0.0438798280871293	0.124618711767447	0.0819090124293081	RRM2	1	0.0153846153846154
GO:1905330	BP	GO:1905330	regulation of morphogenesis of an epithelium	65/18870	0.0438798280871293	0.124618711767447	0.0819090124293081	NTN4	1	0.0153846153846154
GO:0006919	BP	GO:0006919	activation of cysteine-type endopeptidase activity involved in apoptotic process	68/18870	0.0458614763252898	0.126863564380347	0.0833845024096178	SENP1	1	0.0147058823529412
GO:0016925	BP	GO:0016925	protein sumoylation	68/18870	0.0458614763252898	0.126863564380347	0.0833845024096178	SENP1	1	0.0147058823529412
GO:1901880	BP	GO:1901880	negative regulation of protein depolymerization	70/18870	0.047180468172806	0.128838970779586	0.0846828915922159	PLEKHH2	1	0.0142857142857143
GO:0048488	BP	GO:0048488	synaptic vesicle endocytosis	71/18870	0.0478393327426861	0.128984530053065	0.0847785643541274	SNAP91	1	0.0140845070422535
GO:0140238	BP	GO:0140238	presynaptic endocytosis	72/18870	0.0484977767383428	0.129125330565838	0.0848711092920998	SNAP91	1	0.0138888888888889
GO:0045171	CC	GO:0045171	intercellular bridge	92/19886	0.00159749079384037	0.0463272330213706	0.0420392314168517	CDC7/PKNOX2	2	0.0217391304347826
GO:0099243	CC	GO:0099243	extrinsic component of synaptic membrane	14/19886	0.00911634680765405	0.132187028710984	0.119951931679659	SNAP91	1	0.0714285714285714
GO:0030864	CC	GO:0030864	cortical actin cytoskeleton	73/19886	0.0466987137216168	0.233576944672865	0.211957300066121	PLEKHH2	1	0.0136986301369863
GO:0005905	CC	GO:0005905	clathrin-coated pit	75/19886	0.0479493232776609	0.233576944672865	0.211957300066121	SNAP91	1	0.0133333333333333
GO:0032050	MF	GO:0032050	clathrin heavy chain binding	10/18496	0.00700805792658954	0.0789902360866792	0.0527277570796832	SNAP91	1	0.1
GO:0004523	MF	GO:0004523	RNA-DNA hybrid ribonuclease activity	11/18496	0.00770636449626139	0.0789902360866792	0.0527277570796832	RNASEH2A	1	0.0909090909090909
GO:0008199	MF	GO:0008199	ferric iron binding	11/18496	0.00770636449626139	0.0789902360866792	0.0527277570796832	RRM2	1	0.0909090909090909
GO:0016725	MF	GO:0016725	oxidoreductase activity, acting on CH or CH2 groups	11/18496	0.00770636449626139	0.0789902360866792	0.0527277570796832	RRM2	1	0.0909090909090909
GO:0005545	MF	GO:0005545	1-phosphatidylinositol binding	14/18496	0.00979856534520562	0.0803482358306861	0.0536342524158624	SNAP91	1	0.0714285714285714
GO:0043236	MF	GO:0043236	laminin binding	28/18496	0.0195084374272182	0.110838233143865	0.0739870105710007	NTN4	1	0.0357142857142857
GO:0003785	MF	GO:0003785	actin monomer binding	29/18496	0.020198625336761	0.110838233143865	0.0739870105710007	PKNOX2	1	0.0344827586206897
GO:0016891	MF	GO:0016891	RNA endonuclease activity, producing 5'-phosphomonoesters	34/18496	0.0236428428835703	0.110838233143865	0.0739870105710007	RNASEH2A	1	0.0294117647058824
GO:0071855	MF	GO:0071855	neuropeptide receptor binding	35/18496	0.0243303438608483	0.110838233143865	0.0739870105710007	MRAP2	1	0.0285714285714286
GO:0017080	MF	GO:0017080	sodium channel regulator activity	39/18496	0.0270758815454796	0.111011114336466	0.0741024126507862	FGF14	1	0.0256410256410256
GO:0016893	MF	GO:0016893	endonuclease activity, active with either ribo- or deoxyribonucleic acids and producing 5'-phosphomonoesters	43/18496	0.0298142860374482	0.111125975230489	0.0741790848778615	RNASEH2A	1	0.0232558139534884
GO:0003779	MF	GO:0003779	actin binding	438/18496	0.0367275624036705	0.119804744142649	0.0799723580926539	PLEKHH2/PKNOX2	2	0.0045662100456621
GO:0050840	MF	GO:0050840	extracellular matrix binding	55/18496	0.0379868700940106	0.119804744142649	0.0799723580926539	NTN4	1	0.0181818181818182
GO:0030276	MF	GO:0030276	clathrin binding	70/18496	0.0481132310670855	0.130167124548134	0.0868894798010649	SNAP91	1	0.0142857142857143
GO:0043621	MF	GO:0043621	protein self-association	70/18496	0.0481132310670855	0.130167124548134	0.0868894798010649	MDH2	1	0.0142857142857143
