# Supplementary material for: Exploring the mechanism of prognostic genes associated with neuroendocrine differentiation and immunotherapy resistance in non-small cell lung cancer based on the bulk transcriptome and single cell RNA sequencing
Source: Research Square preprint supplement (doi:10.21203/rs.3.rs-8816614/v1), 2026-02-16
Supplement: Supplementary file 3 [file abbe558e0fffffdc761f1f44.xlsx]

## Sheet: NEDRGs
gene
CALCA
CHGA
CHGB
CCK
GRP
ENO2
NPY
PTHLH
GRPR
HTR1A
HTR1B
SSTR1
SSTR2
SSTR3
SSTR4
SSTR5
SLC31A2
CCKAR
CCKBR
NPY1R
NPY2R
NPY4R
NPY5R
VIPR1
VIPR2
PTH1R
VEGFA
UNC13A
TMEM63C
CAMK2N2
CDC45L
DQ601936
TMEM151A
KCNH2
CHRNB2
CDK5R2
SCAMP5
C19orf52
ZMYM3
AK054931
BC028014
AP3B2
ILVBL
CPLX2
BC019026
SMARCA4
LPHN1
HIST3H3
LOC90835
GALK1
OPRD1
SLC2A6
TFR2
NETO2
LRTM2
GPRIN1
CLDN9
ILF3
MANEAL
FBXL16
SPC25
GLT25D1
NRIP3
CEP55
OGDHL
NEK2
CCNF
PRIM1
SYN1
GMIP
EPR-1
NTN2L
TMEM145
MORN3
HMMR
AX747488
DPYSL5
EXO1
TNFRSF13C
E2F2
ANLN
SENP1
E2F3
KIF4A
CNPY4
PRR11
KCNK3
RAB3C
STC2
CHAF1B
SLC25A5
DNAJB13
E2F8
KIAA1853
GDAP1
SSRP1
DKFZp547H154
CCDC74A
DSCC1
AK024736
NAV1
MYBL2
DEPDC1B
PAQR4
XKR7
KIF4B
TIMELESS
EEF1A2
TACC3
KIF11
BC035392
WDR18
FAM123C
MKI67
PHKG1
SAFB
PATL1
BC025345
PTTG3
AX746487
KLHL26
HIST1H4A
CENPF
TFAP4
LINGO1
SYP
C19orf57
TK1
CASP2
GINS1
RUNDC3A
PTTG2
AK123483
C2orf48
SHCBP1
FBXO43
ABHD8
CDC34
HCN2
CCDC150
PPIA
SLC38A1
BSN
TMEM121
HJURP
ULBP1
POLRMT
RNF165
DQ575742
HOXC9
CSNK1G2
CDT1
C19orf43
CENPA
C19orf29
BX537706
CDC42BPB
SF3A2
ETNK2
PLK1
AK092511
AF161441
SPC24
FAM148C
DKFZp761K0816
RNF126
CKAP2L
FLJ25404
TPPP3
SKP2
TSEN54
BUB1
SNCB
ESM1
SLC26A10
ARHGEF18
FOXM1
ZNF512B
SYT5
BCR
CFL1
PANK1
GSG2
GTSE1
SVOP
MCM10
PAFAH1B3
ARHGAP11A
FAM57B
LOC198437
CDCA5
CTPS
LRRC16B
STXBP1
UNC5A
DUSP4
PTTG1
ESPL1
IER5L
B4GALNT4
LOC401399
FOXD1
AK096668
KNTC1
LIN9
TMEM169
RAB39
STXBP5L
FANCC
CENPM
HS3ST6
CRYBA2
PTK6
KISS1R
FAM102A
NCAPD2
C10orf132
MAP1B
LPL
PRPH
POMT2
PCDH24
NEURL
PLK4
CENPI
PANK4
UBE2T
NDUFA4L2
DISP2
SIX2
CCDC151
DCLRE1B
PSPN
IQGAP3
NPPB
BMP8B
GFOD1
CIT
PALB2
FUT7
AKIRIN2
SAMD1
CDC20
CEP78
RPS6KL1
CACNB1
VGF
UBE2I
PRPF6
CCDC130
CDCA4
CELSR2
C2orf70
TMEM16H
SLPI
CRTC1
TPX2
FAM171A2
DQ582856
RNASEH2A
PGSF1
TIGD3
SH3GL1
FADS1
DAZAP1
SMC6
FRMD8
LOC440356
ASF1B
DSCR6
BUB1B
PRR19
CHRM4
KIF18B
STX1A
TOP2A
ZWINT
KRTAP5-10
AK127555
KIAA1653
KIF14
NKX2-2
AK097527
RRM2
PIP5K1C
WDR34
PRR6
KIAA1958
REEP1
RTBDN
CPNE9
MCM5
BC014150
CCDC28B
ZNF669
EIF4EBP1
HOXC11
NUDT1
BICD2
NUSAP1
DKFZp761F2014
MAPK8IP1
DPP9
FAM40B
ARHGAP11B
E2F1
POLA2
NKIRAS2
AX747026
C16orf75
ASPM
CREBBP
BARX1
NY-SAR-48
K03200
TMEM59L
PGBD5
AHDC1
GRPEL2
C1orf187
INSM2
AURKA
ZNF409
LMNB1
PLEKHG4B
ARID3C
WDR62
LINGO3
CDC6
ZFHX2
GNAZ
TTLL10
CENPK
GNG4
C18orf24
SALL2
C9orf40
C18orf23
WDHD1
CHML
SLC25A19
FAM72B
KIF20A
C13orf3
KLF13
CHST8
U52827
CHAC2
RGS19
SEMA6B
SNX30
XRCC2
CNIH2
PKMYT1
TBC1D10B
ARNTL2
MPFL
BC127858
MCM6
GABRD
DQ588163
BC038570
MFI2
RTDR1
JAG2
MCM7
CHAF1A
TRIP13
FGF11
ZIC2
FGD1
NPR1
IPMK
LZTS1
BC061893
TOX3
ONECUT2
GCHFR
CR599439
AX747191
SLC12A5
B4GALNT1
CLSPN
GAS2L3
AB073658
RNPS1
ITPR3
DQ599399
ASPHD1
C16orf59
MCM2
LHX2
C11orf9
LHFPL5
CR603272
PCGF2
AK056073
VSIG8
USP49
PPP1R9B
BC067862
FEN1
SUV39H1
AK126380
TMEM211
ASB16
TPR
ZNF367
LOC90379
AK307291
RAD51AP1
INCENP
C10orf91
ZDHHC13
BC041890
PRPF4
LOC389458
NONO
CDCA8
DKFZp434H202
S1PR5
MBD3
NEIL3
CD24
AK311458
LSM7
HCN3
TLX1
CTXN1
DYNLL1
COX8A
ABCC8
DPY19L2P2
DTX3
WDR79
PLP2
NAT11
KCNG2
EPPK1
MYO1D
ZNF77
DNM1
APCDD1L
C17orf65
C10orf30
FAM80A
BC047644
DPF1
KIF2A
F12
CCDC93
C4orf46
SSBP4
CCNA2
KIF23
QSOX2
RNF168
MAD2L2
DUSP8
TULP4
AMH
KRTAP12-4
OIP5
RFC5
RPLP0
ORC1L
NGF
BC009440
WDR76
CDC7
HABP2
CS444397
BC019672
SF3B2
AK055267
UBE2S
AK125051
APAF1
KRTAP5-2
CEP72
SPACA4
ACAA2
ADAM22
ADAMTS14
ADAMTS18
ADCYAP1
ADORA1
ADRA2C
AGAP2
AGBL4
AIM1L
AK7
AMDHD1
ANKRD36
ANP32E
APLP1
ASAP1
ASTN1
ASXL3
ATAD5
ATP1A3
AZI1
BEGAIN
BEND5
BIRC5
BRSK1
C10orf140
C12orf39
C12orf42
C12orf56
C19orf55
C4orf21
C6orf118
C6orf126
C6orf138
C6orf174
C9orf100
CA10
CA8
CA9
CACNA1A
CAMP
CASC5
CCDC19
CDCA2
CDKN2A
CDKN2C
CELSR3
CGA
CHRNA3
CIB2
CPT1C
CRABP1
CRIP1
CSPG4
CTHRC1
DCLK1
DENND2A
DLL3
DLX4
DMBX1
DNAI1
DNAI2
DNAJC12
DNAJC6
DNAJC9
DOK6
DPYSL2
DPYSL3
DSCAML1
DTX1
EFNB1
EFNB3
EID2B
ELF4
ELMO1
FAM161A
FAM176A
FAM184A
FAM46A
FANCA
FHAD1
FOXD2
FOXN4
FRMD3
FRMD5
FYN
GABBR2
GALNT14
GFI1
GGH
GJC1
GOLGA7B
GPC2
GPR153
GRIN2D
GRM8
HCN4
HES6
HMGN3
HOXB4
HOXD3
HPSE
IFI27L2
IGFBPL1
INA
JAKMIP2
KCNH6
KCNH7
KCNMB2
KIAA0319
KIAA0408
KIAA2022
KIF19
KIT
KLHL32
KPNA2
LAMB1
LEFTY1
LMO3
LRRC8C
MAP1A
MAPRE2
MAST1
MAT1A
MCAM
MEST
MST1R
MUC1
MYBL1
MYCN
MYO7A
MYT1
NCAM1
NEFL
NFASC
NKD2
NMU
NOTCH4
NPTX1
NPTX2
NRCAM
NRM
OLFM1
OLIG1
OSBPL6
PAX2
PCBP3
PCDHA2
PCDHB9
PDZD4
PGF
PLAUR
PLCD4
PLCL2
PLEKHG4
PLEKHH2
CACNA2D3
PLS1
PLXNA2
PLXNC1
PNMA2
PNMAL1
PPM1D
CAMK1D
PROCA1
PROX1
PSD2
PSIP1
RAB33A
RBBP8
REEP2
RHEBL1
RIBC2
RNFT2
SCG3
SCGB2A1
SCN8A
SEMA5B
SGCE
SH3GL2
SLC8A2
SLFN13
SNAP25
SOX11
SPEF1
SRGAP1
STOX1
STX2
SULT4A1
SYN2
SYNPO2L
SYT1
TEKT2
TLE2
TLE6
TMEM132E
TMOD2
TMPRSS6
TNFRSF25
TNIK
TNNI3
TNNT1
TOX
TRIM9
TUBB2B
UHRF1
USP11
WSCD1
ZMYND10
FMN2
KIF5A
MIAT
PAM
SEMA5A
TAGLN3
ABAT
ABCB4
ABCC4
ACADL
ACSM1
ACSM3
ACSS3
ADAM9
ADHFE1
ADRB1
AGR2
AGTR1
ALDH2
ALOX15B
ANGPT1
ANXA1
ARHGAP6
BAG3
BCAS1
BLNK
C10orf81
C4orf32
C6orf105
C8orf4
CAMKK2
CCDC64B
CCL3
CCND1
CD302
CD9
CDK6
CDO1
CEACAM1
CGREF1
CLCF1
COBLL1
COL12A1
COMT
CORO1B
CPEB2
CRISP2
CRISPLD1
CRYL1
CRYM
CYP4F11
CYP4F12
CYP4F2
DNASE2B
DPP4
DSC3
EDA
ELL2
ELOVL7
ENDOD1
ERBB3
FAM153A
FAM5C
FAS
FBP1
FECH
FMO5
FOLH1
GAL
GALM
GHR
GJB1
GLB1L2
GLYATL1
GNG12
GNG7
GOLM1
GPR160
GREB1
GREM2
GRTP1
GUCY1A3
HLA-DMB
HLA-DRB5
HOOK3
IKZF2
IL1R1
IL1RAPL1
IMMP2L
ITM2B
KL
KLHL13
KLK15
LACTB
LATS2
LDHD
LGR4
LPHN2
LRRC26
LTF
LUZP2
LXN
MALT1
MESP1
MID2
MPP7
MUM1L1
NANS
NAP1L2
NFIL3
NOSTRIN
NTN4
NTNG1
NUDT4
OPRK1
PACSIN3
PARP6
PCCA
PDIA5
PEBP4
PKNOX2
PKP1
PLA2G4F
POLB
POLD4
PPFIBP1
PPM1H
PSCA
PTGS2
PVT1
RAB27A
RBPMS2
REPS2
RFPL1
RFPL2
RFX6
RGS10
RHOU
RIPK2
RNF41
RORC
RRAS
RRAS2
SAMD13
SC5DL
SEC14L2
SEL1L
SERP1
SERP2
SETD7
SI
SIDT1
SIM2
SLC16A9
SLC22A5
SLC26A3
SLC26A4
SLC39A6
SLC39A8
SLC43A1
SLCO2A1
SNHG8
SNORA74A
SPATA13
ST6GALNAC1
STAT6
STON1
STON1-GTF2A1L
STX19
STXBP6
SULT2B1
TACC2
TACSTD2
TANC1
TGM3
THRB
TMCC3
TMEFF2
TMEM117
TMEM133
TMEM144
TMEM87A
TNFAIP3
TPD52L1
TRPS1
TSPAN33
TXK
WWP1
ZC3H12A
ZCCHC6
ZNF532
BRINP1
SEM1
GNAO1
KCNB2
KCND2
CARMIL3
MAP10
NRSN1
PCSK1
RGS7
SEC11C
SEZ6
ST8SIA3
SYT11
TFF3
PCSK1N
SCG2
TPH1
CPE
ASCL1
SCG5
TMEM176A
IGFBP5
TMEM176B
KLK12
PHGR1
PKIB
C4orf48
QPCT
BEX1
BASP1
QDPR
UCHL1
MAOB
UCP2
ZACN
SCGN
IZUMO4
SLC38A11
SPOCK1
SLITRK6
FGF14
ST18
MS4A8
KIF1A
MAP9
STMN2
FXYD6
LCORL
TMEM61
DDC
KCNJ6
LY6H
HOXB2
FIBCD1
SYT13
ELAVL4
FOXA2
SLC35D3
ESPN
NLRP1
GSTM3
NIM1
GUCY1B2
DAPL1
USP27X
RAB3A
B3GAT1
TSHZ2
PPP1R1A
CPEB1
INSM1
C20orf26
JAKMIP1
PRTFDC1
CAND2
FGF9
MYL6B
C14orf132
FLJ33996
BEX2
KCNC3
SRRM4
SMPD3
RIMS2
SEZ6L2
STMN3
TMEM198
DUSP26
B3GNT8
CELF3
SLC26A9
SST
SFTA3
NOVA1
MIR7-3HG
HOXD11
ACTL6B
SRRM3
KCNC1
SYT4
CRMP1
UNC79
SLC4A11
ABLIM2
CELF4
KCNK10
ST6GAL2
D4S234E
OSCAR
PHYHIPL
NOS1AP
MACROD2
KIF6
PTPRN2
ADAM23
CADPS
PCDH8
NOL4
CNTN4
PHF21B
DNER
UNC80
C5orf4
FABP6
INSL5
KCNB1
C12orf49
PIR
WDR5
YAP1
HEXIM1
AJUBA
MPZL2
LIMA1
ALDH6A1
WDR43
RNF43
SP1
GALNT7
ODC1
SYPL1
SERINC5
GNPNAT1
ENTPD7
ERLIN2
GCLM
GRHL2
SMO
TMPRSS2
METAP1D
TRIB1
ST8SIA6-AS1
CECR6
AMER3
PSD
SCRT1
RIMBP2
DISP3
MMP24
HEPACAM2
DLGAP3
SLC6A17
NMNAT2
MIR9-3HG
BRSK2
GPR158
VWA5B1
SNAP91
APBB1
C1orf226
MGAT5B
HMP19
GRM4
FSTL4
ERC2
RTN2
OTUD7A
LINC00673
SCGB1D2
EPHB2
CHD5
SSTR5-AS1
PPM1E
SLC18A1
CLSTN2
KCNJ3
TUBB3
SCN3B
KCNN4
LHFPL4
CPEB1-AS1
CARMIL2
L1CAM
ENHO
LINC01750
MAGED4B
RNF150
TMEM178B
HRH3
SOBP
PAX5
PPP2R2C
RET
CTNNA2
NEURL1
LOC442497
SLIT1
FAM230C
FHOD3
SPATA46
EML6
CBLN2
ADAMTSL1
LINC01664
ELAVL3
GPR173
SPTBN4
KSR2
CAMKV
INSRR
SMOC1
FAM131B
LOC100129175
GRIP1
LDHC
RIMS4
USH1G
ASB4
TMEFF1
ADD2
NKX6-1
ISX
ANK1
NAT8L
MRAP2
CACNA1B
MGAT3
MIR4697HG
DRD2
BEX5
KCNK9
GRID1
ERICH5
DGCR5
GRIK3
TENM2
PTPRN
PCDHAC1
MAPT-AS1
KCND3
TUNAR
IGSF21
TH
TESC
MUC6
PTPRD
FOXA3
TCTE1
RTN1
SYN3
NAT16
CCDC187
RGS6
TMEM151B
RHBDL3
BCL11A
NKX6-3
EPHA8
KCNK12
SLC5A1
MAEL
FGF12
MUC5B
PKLR
TTC34
OLFM4
CNTN2
GALNT13
STMN4
LOC100130111
SYNGR4
ARHGEF7-AS2
GLT1D1
FAM163B
NETO1
RIC3
WDR63
FAM178B
ADGRB3
PTH2R
SEZ6L
RNF182
CXXC4
BAALC
CDH2
DCX
KLHL14
NELL1
NRXN1
PEG10
SHOX2
MLLT11
E2F7
SLC36A4
RBM38
SCN3A
CHD7
HOXB3
NAV2
CRTAC1
HOXD10
RFX2
PRC1
EZH2
PRELID2
H19
TROAP
CDKAL1
SNCAIP
CKS1B
ARHGEF2
PSRC1
SLCO3A1
ITGB3BP
LIG1
DAND5
ACYP1
HAUS8
FSD1
MCM3
KCTD16
RB1
TUBA1C
DONSON
SIDT2
PDGFA
KLF9
LTBR
ZCCHC24
ARHGEF5
ADI1
MLEC
PNPLA4
DHRS3
TMEM192
LGALSL
NFIX
SH2D4A
CYB561
ACADSB
APLP2
NOTCH2
KIAA1522
RAB27B
ZNF350
GLUD2
CIB1
AMD1
CSGALNACT1
SGMS1
SRXN1
FKBP5
TMEM159
TMEM184C
EPN3
ZNF613
SLC35F2
ZNF615
SFT2D1
TAOK3
CDYL2
CREB3L4
ALDH1A3
TP53TG1
ARHGEF37
RWDD2A
PIEZO1
PEX11A
ZHX2
CPNE3
RDH11
MLPH
REXO2
IDH1
H2AFJ
TRPM4
CROT
COLEC12
STEAP4
ZNF217
EHF
REST
STAP2
EMB
CYP39A1
KLK4
KLK2
FAM198B
GATA2
CPNE4
CWH43
BMPR1B
PLEKHH1
TRPV6
FOLH1B
APC
ARMC5
ATRX
CDKN1A
CDKN1B
CDKN2B
DAXX
DLST
DNMT3A
EPAS1
FH
GCGR
GNAS
KCNJ11
KIF1B
LMNA
MAFA
MAX
MDH2
MEN1
NF1
PRKAR1A
SDHA
SDHAF2
SDHB
SDHC
SDHD
SLC25A11
TMEM127
TSC1
TSC2
VHL
YY1
ZMAT4
RXFP1
CTAG1A
ADGB
WNT11
CACNA1E
SPAG17
CACNA2D4
TRIM55
CHRD
TMPRSS3
SEMA3A
PRDM8
ADGRL3
CNTN5
EPHA7
PRSS16
TENM3
MAGEA3
LPA
PAPPA2
LCT
RDM1
RGPD2
NLGN4X
RBP5
HSD17B3
SV2A
PAGE2B
GABRA3
PRELP
PNMA5
PTPRT
C1orf101
KCNQ5
DUOXA1
ATP6V0D2
SSC5D
ADAM7
SPDEF
TFAP2C
CNTNAP2
MB
ACPP
C8orf34
PLA2G2A
LIPH
GULP1
AMTN
PAX9
ADGRB1
CXCL11
CRISP3
PKHD1
ADCY2
SIGLEC5
CCDC96
MGST1
TSPAN8
RAB6C
TTR
CDH7
PLEKHS1
TFF1
MYBPC1
KLK11
HGD
SPTSSB
HS3ST4
AGR3
B3GALT5
FRMPD2
ANXA3
CD177
B3GNT3
CDH17
CHADL
SLC17A4
HIST2H2AA3
MSX2
DPYSL4
ANKRD22
UGT2B15
TMPRSS11E
SULT1A4
COL2A1
ODAM
2025-03-04
RIPPLY3
AFP
DNMT1
HOXC10
NKX2-1
ADGRL1
CDC25C
UBE2C
CCNE2
KIF2C
PCNA
PHF19
TMEM74
TUBA1B
AURKB
HNRNPM
USH1C
NPC1L1
SOGA3
2025-03-11
CERK
CCNB2
LMNB2
C21orf58
NUF2
STMN1
DTL
CFAP61
ANO8
NTN3
C1QL1
KCNA4
NR0B2
LEMD1
TECR
WWOX
TMEM179
DCAF15
SLC27A3
CEL
LCN15
TSPEAR
PTCHD4
C16orf92
CENPV
DDX11
PTCHD2
CER1
LINGO2
TYMS
DOT1L
RAB39A
HEY2
NDST4
UGT8
VWA5B2
CDHR2
PNPLA6
SKA1
ZBTB8B
CABP7
FAM64A
KCNH3
PCSK2
CADM2
GCK
TCF19
CEP131
CTPS1
CDC25B
GINS2
KIFC1
PPP2R2B
EVA1A
