# Supplementary material for: Exploring the mechanism of prognostic genes associated with neuroendocrine differentiation and immunotherapy resistance in non-small cell lung cancer based on the bulk transcriptome and single cell RNA sequencing
Source: Research Square preprint supplement (doi:10.21203/rs.3.rs-8816614/v1), 2026-02-16
Supplement: Supplementary file 4 [file ac43b5ade383b6bcc29765c1.xlsx]

## Sheet: 02.wilcox_res_filter_sample
	ImmuneCell	.y.	group1	group2	n1	n2	statistic	p	p.adj	p.signif
1	Activated CD4 memory T cells	Score	High Risk	Low Risk	366	312	69787	4.72e-07	1.0384e-05	****
2	Activated NK cells	Score	High Risk	Low Risk	366	312	50817	0.0112	0.0352	*
3	Activated dendritic cells	Score	High Risk	Low Risk	366	312	52942.5	0.0928	0.157046153846154	ns
4	Activated mast cells	Score	High Risk	Low Risk	366	312	60747.5	0.0492	0.0984	*
5	CD8 T cells	Score	High Risk	Low Risk	366	312	61186	0.108	0.169714285714286	ns
6	Eosinophils	Score	High Risk	Low Risk	366	312	57094	0.999	0.999	ns
7	Gamma delta T cells	Score	High Risk	Low Risk	366	312	57524.5	0.693	0.7623	ns
8	M0 Macrophages	Score	High Risk	Low Risk	366	312	65760	0.000654	0.0028776	***
9	M1 Macrophages	Score	High Risk	Low Risk	366	312	65173	0.00149	0.00546333333333333	**
10	M2 Macrophages	Score	High Risk	Low Risk	366	312	51644	0.032	0.0704	*
11	Memory B cells	Score	High Risk	Low Risk	366	312	56947	0.883	0.925047619047619	ns
12	Monocytes	Score	High Risk	Low Risk	366	312	47862.5	0.000171	0.0009405	***
13	Naive B cells	Score	High Risk	Low Risk	366	312	58653	0.54	0.66	ns
14	Naive CD4 T cells	Score	High Risk	Low Risk	366	312	57537	0.242	0.33275	ns
15	Neutrophils	Score	High Risk	Low Risk	366	312	53970	0.217	0.318266666666667	ns
16	Plasma cells	Score	High Risk	Low Risk	366	312	59706.5	0.305	0.394705882352941	ns
17	Regulatory T cells (Tregs)	Score	High Risk	Low Risk	366	312	52519	0.0717	0.13145	ns
18	Resting CD4 memory T cells	Score	High Risk	Low Risk	366	312	47329	0.000122	0.000894666666666667	***
19	Resting NK cells	Score	High Risk	Low Risk	366	312	62364	0.0277	0.0704	*
20	Resting dendritic cells	Score	High Risk	Low Risk	366	312	51589	0.0299	0.0704	*
21	Resting mast cells	Score	High Risk	Low Risk	366	312	46856	5.39e-05	0.0005929	****
22	T follicular helper cells	Score	High Risk	Low Risk	366	312	58289	0.639	0.739894736842105	ns
