# Supplementary material for: Exploring the mechanism of prognostic genes associated with neuroendocrine differentiation and immunotherapy resistance in non-small cell lung cancer based on the bulk transcriptome and single cell RNA sequencing
Source: Research Square preprint supplement (doi:10.21203/rs.3.rs-8816614/v1), 2026-02-16
Supplement: Supplementary file 5 [file bc2192c757353d9fef585dad.xlsx]

## Sheet: GSEA_PLEKHH2_KEGG_gsea
	ID	Description	setSize	enrichmentScore	NES	pvalue	p.adjust	qvalue	rank	leading_edge	core_enrichment
Ribosome	Ribosome	Ribosome	88	-0.858754	-3.46519	9.69796670005078e-37	9.69796670005078e-37	9.18754740004811e-35	4651	tags=82%, list=8%, signal=75%	RPS27/RPS25/RPL10/RPS15A/RPS20/RPS3A/RPS13/RPL9/RPS28/RPS6/RPS4X/RPS9/RPL5/RPL23/RPL23A/RPS29/RPL3L/RPS24/RPL3/RPL32/RPL30/RPL31/RPLP2/RPL17/FAU/RPS26/RPL29/RPS12/RPL27A/RPS11/RPL13/RPL13A/RPL37A/RPL19/RPS8/RPL12/RSL24D1/RPL10A/RPL7/RPL28/RPS21/RPS16/RPL39/RPSA/RPL41/UBA52/RPL7A/RPL37/RPS27A/RPL27/RPS3/RPS15/RPL38/RPL6/RPL18A/RPL4/RPS18/RPL36/RPL24/RPL18/RPL35/RPS5/RPLP1/RPL22L1/RPL8/RPS19/RPL26L…
Oxidative phosphorylation	Oxidative phosphorylation	Oxidative phosphorylation	132	-0.671821	-2.83107	1.14609099371878e-22	1.14609099371878e-22	5.42885207551003e-21	6027	tags=60%, list=11%, signal=54%	COX7B2/NDUFS7/COX7C/NDUFB1/ATP5PO/NDUFA2/NDUFA4/UQCR10/ATP5ME/NDUFS4/PPA1/UQCRB/NDUFA3/ATP6V1A/NDUFS1/NDUFA10/COX6B2/PPA2/SDHD/NDUFV1/NDUFA4L2/NDUFC1/ATP5F1E/ATP6V1E2/UQCR11/UQCRC2/ATP5F1A/ATP6V1G1/ATP6V0B/NDUFB2/NDUFB6/UQCRHL/COX10/ATP5PF/NDUFS2/NDUFA9/ATP6V1E1/NDUFA1/UQCRQ/NDUFS5/ATP5PB/NDUFB10/NDUFB7/COX17/COX6C/ATP5F1D/NDUFS3/NDUFA6/SDHB/NDUFS8/COX4I1/COX7A2/ATP5MF/ATP5F1C/ATP6V1F/ATP5PD/COX7…
Parkinson's disease	Parkinson's disease	Parkinson's disease	130	-0.672627	-2.83723	2.94782772547783e-22	2.94782772547783e-22	9.30892965940368e-21	6027	tags=64%, list=11%, signal=57%	COX7B2/NDUFS7/COX7C/NDUFB1/TH/ATP5PO/NDUFA2/NDUFA4/UQCR10/NDUFS4/UQCRB/NDUFA3/NDUFS1/NDUFA10/COX6B2/SDHD/NDUFV1/NDUFA4L2/UBE2J2/NDUFC1/ATP5F1E/UQCR11/SLC25A6/UQCRC2/ATP5F1A/PPID/VDAC2P5/NDUFB2/NDUFB6/UQCRHL/ATP5PF/HTRA2/NDUFS2/PARK7/NDUFA9/NDUFA1/UQCRQ/NDUFS5/UBE2G1/ATP5PB/NDUFB10/NDUFB7/COX6C/ATP5F1D/CASP3/NDUFS3/NDUFA6/SDHB/NDUFS8/COX4I1/COX7A2/UBE2L3/ATP5F1C/VDAC3/ATP5PD/COX7B/NDUFB3/UQCRFS1/U…
Cell cycle	Cell cycle	Cell cycle	125	-0.692372	-2.8813	5.8600181056048e-22	5.8600181056048e-22	1.38789902501166e-20	4715	tags=57%, list=8%, signal=52%	ORC3/CCNA1/CDKN2D/CDC26/ORC4/FZR1/CCNE2/ANAPC13/ORC2/ANAPC1/CDKN2A/CUL1/E2F3/CDC27/CDC7/RBL1/PRKDC/CDK2/RBX1/E2F4/RAD21/MYC/MCM3/TFDP1/CDK7/SKP2/HDAC1/E2F1/ANAPC7/ANAPC5/E2F2/HDAC2/YWHAE/MAD2L2/CHEK2/MCM5/ESPL1/MCM7/ANAPC11/BUB3/CCNE1/YWHAG/MCM6/YWHAQ/MCM2/DBF4/CDK4/ORC5/ORC6/SFN/CDC25A/PKMYT1/CHEK1/CDC25C/PCNA/BUB1/MCM4/TTK/BUB1B/YWHAZ/ORC1/PTTG1/CDC45/CDC6/CDK1/PLK1/MAD2L1/CCNA2/CDC20/CCNB2/CCN…
Huntington's disease	Huntington's disease	Huntington's disease	182	-0.586419	-2.55477	2.84934409676157e-20	2.84934409676157e-20	5.39875723596929e-19	5390	tags=53%, list=9%, signal=48%	NDUFB1/ATP5PO/NDUFA2/NDUFA4/POLR2B/UQCR10/NDUFS4/UQCRB/NDUFA3/NDUFS1/CLTB/POLR2E/NDUFA10/COX6B2/SDHD/AP2A1/BAX/NDUFV1/NDUFA4L2/HAP1/NDUFC1/ATP5F1E/UQCR11/SLC25A6/UQCRC2/ATP5F1A/PPID/VDAC2P5/POLR2I/CLTA/NDUFB2/NDUFB6/UQCRHL/TAF4B/ATP5PF/NDUFS2/NDUFA9/POLR2K/NDUFA1/UQCRQ/NDUFS5/ATP5PB/DCTN2/NDUFB10/NDUFB7/TBPL1/TFAM/COX6C/HDAC1/ATP5F1D/CASP3/NDUFS3/NDUFA6/SOD1/POLR2D/SDHB/NDUFS8/COX4I1/COX7A2/ATP5F…
Proteasome	Proteasome	Proteasome	46	-0.868579	-3.08669	3.52472527102218e-20	3.52472527102218e-20	5.56535569108766e-19	3095	tags=70%, list=5%, signal=66%	PSMF1/PSME4/PSMC1/PSMC6/PSMA3/PSMD13/PSMC5/PSMD1/POMP/PSMC3/PSMB2/SEM1/PSMD12/PSMB1/PSMC2/PSMD11/PSMD7/PSMC4/PSMA5/PSMD8/PSMD3/PSMB6/PSMD4/PSMA7/PSME3/PSMA4/PSMB7/PSMD2/PSMB3/PSMB5/PSMB4/PSMD14
Spliceosome	Spliceosome	Spliceosome	127	-0.650574	-2.71334	1.85561495411689e-19	1.85561495411689e-19	2.5113585845191e-18	6399	tags=57%, list=11%, signal=50%	SRSF2/SART1/SNRNP27/DHX8/SNW1/SRSF1/PLRG1/SF3B2/CRNKL1/CDC5L/DDX23/HNRNPM/RBMX/LSM6/SF3A3/SF3A2/CWC15/SNRPB2/U2SURP/PRPF31/BCAS2/NCBP1/PPIH/HSPA8/ISY1/TRA2B/PRPF40A/WBP11/HNRNPA1/LSM3/PQBP1/TXNL4A/SRSF3/MAGOH/SF3B3/HSPA1B/SMNDC1/U2AF2/HNRNPK/SNRNP40/NCBP2/LSM7/BUD31/SF3B4/EFTUD2/SF3B5/SNRPA/PRPF4/SNU13/SNRPA1/LSM5/MAGOHB/USP39/PUF60/SRSF9/PHF5A/PRPF19/ALYREF/THOC3/LSM2/SNRPD1/SF3B6/EIF4A3/SNRPF/S…
Alzheimer's disease	Alzheimer's disease	Alzheimer's disease	166	-0.569478	-2.42256	2.62718928449655e-17	2.62718928449655e-17	3.11114520532486e-16	6027	tags=53%, list=11%, signal=48%	COX7B2/NDUFS7/PSENEN/COX7C/NDUFB1/ATP5PO/NDUFA2/NDUFA4/UQCR10/CHP2/NDUFS4/IDE/UQCRB/NDUFA3/NCSTN/NDUFS1/NDUFA10/ADAM17/COX6B2/TNFRSF1A/SDHD/NDUFV1/NDUFA4L2/CALML5/NDUFC1/ATP5F1E/UQCR11/UQCRC2/ATP5F1A/NDUFB2/FADD/NDUFB6/UQCRHL/ATP5PF/NDUFS2/NDUFA9/NDUFA1/UQCRQ/NDUFS5/ATP5PB/NDUFB10/NDUFB7/CALML3/COX6C/CAPN1/ATP5F1D/CASP3/ATP2A2/CDK5R1/NDUFS3/NDUFA6/APH1A/SDHB/NDUFS8/COX4I1/COX7A2/PPP3R1/ATP5F1C/NA…
Pyrimidine metabolism	Pyrimidine metabolism	Pyrimidine metabolism	97	-0.643303	-2.63907	1.4007435658138e-14	1.4007435658138e-14	1.47446691138295e-13	5049	tags=56%, list=9%, signal=51%	DCTD/POLA1/POLR3B/POLR2B/POLE/NME2/CDA/PNP/POLR3C/POLR2E/POLR1A/POLR3D/DCK/NT5M/POLD1/CANT1/POLR1E/POLR2I/NT5C/POLA2/CAD/ITPA/POLR2K/TXNRD1/POLR3G/POLR1D/NUDT2/POLE4/TYMS/POLR1B/POLR1H/PNPT1/POLR2D/POLE2/PRIM1/POLR1C/DUT/RRM1/CTPS1/POLR3K/NME4/POLR2J/POLR2F/POLR2G/PRIM2/UCK2/UMPS/POLE3/POLR2H/POLD2/DTYMK/RRM2/NME1/TK1
DNA replication	DNA replication	DNA replication	36	-0.844896	-2.90424	1.49258407934483e-13	1.49258407934483e-13	1.4140270225372e-12	2978	tags=81%, list=5%, signal=76%	RNASEH2C/POLA1/RNASEH2A/POLE/POLD1/LIG1/POLA2/MCM3/RPA1/POLE4/DNA2/POLE2/PRIM1/RPA3/RFC3/MCM5/RFC5/MCM7/PRIM2/MCM6/MCM2/POLE3/RFC4/RFC2/PCNA/FEN1/MCM4/POLD2/SSBP1
Aminoacyl-tRNA biosynthesis	Aminoacyl-tRNA biosynthesis	Aminoacyl-tRNA biosynthesis	41	-0.777452	-2.71879	8.14606087543033e-12	8.14606087543033e-12	7.0157462085046e-11	4261	tags=59%, list=7%, signal=54%	RARS2/EARS2/NARS1/CARS1/AARS1/TARS2/MTFMT/EPRS1/PARS2/IARS2/VARS1/RARS1/YARS1/MARS2/MARS1/IARS1/DARS2/GARS1/TARS1/FARSA/DARS1/KARS1/FARSB/YARS2
Vascular smooth muscle contraction	Vascular smooth muscle contraction	Vascular smooth muscle contraction	115	0.631963441612394	1.99126823885557	1.13837373418764e-10	1.13837373418764e-10	8.98716105937613e-10	8816	tags=55%, list=15%, signal=46%	ADCY4/PRKCE/GUCY1A2/NPR1/PPP1R12B/ADCY9/GNAQ/CACNA1D/PLA2G1B/CACNA1C/ADRA1A/ADCY6/PTGIR/RAMP2/AGTR1/PLCB2/PRKG1/RAMP3/GUCY1A1/CALCRL/PPP1R14A/PLA2G5/ITPR1/ARHGEF12/PRKCB/IRAG1/EDNRA/PRKCH/MYH11/PRKCD/ROCK1/MYL9/ADCY7/MYLK/ROCK2/PRKCQ/ITPR2/PLA2G12A/CYP4A22/CACNA1F/ACTG2/ARHGEF1/ADORA2A/GUCY1B1/ADRA1B/ITPR3/PRKCA/BRAF/CACNA1S/PLA2G12B/CYP4A11/MYLK3/PLA2G10/ACTA2/RHOA/RAF1/KCNMB1/MAPK3/ARAF/CALM1/N…
Cell adhesion molecules (CAMs)	Cell adhesion molecules (CAMs)	Cell adhesion molecules (CAMs)	130	0.615677361183888	1.95851774940726	1.46167051356302e-10	1.46167051356302e-10	1.06518498964107e-09	10034	tags=54%, list=18%, signal=44%	ITGA8/JAM2/CDH5/CLDN18/SPN/ITGA9/ESAM/SELP/PECAM1/CD34/PTPRM/CADM1/NEGR1/CD40LG/ITGAL/SIGLEC1/ICAM2/HLA-DOA/HLA-E/OCLN/SELPLG/HLA-DMA/CLDN5/JAM3/PTPRC/ICAM1/NCAM2/HLA-DPB1/HLA-DPA1/CD4/CD22/ITGAM/HLA-DRB1/HLA-DQB1/HLA-DMB/HLA-DRB5/HLA-DRA/HLA-DQA1/ITGA4/CNTNAP1/CD226/ITGB2/NFASC/CADM3/CLDN23/SDC3/SDC4/CD6/NECTIN3/SELL/NRXN3/ALCAM/CD86/HLA-F/MAG/ICOS/SELE/CD80/CLDN2/ICAM3/CLDN11/CLDN15/HLA-C/CD28/…
Ubiquitin mediated proteolysis	Ubiquitin mediated proteolysis	Ubiquitin mediated proteolysis	135	-0.50075	-2.09156	1.99067020968715e-10	1.99067020968715e-10	1.34707006670559e-09	6767	tags=44%, list=12%, signal=39%	PIAS4/UBE2QL1/UBE2H/UBE3A/FANCL/STUB1/CDC23/UBE2D1/FBXO4/UBE2E1/CUL4B/UBE2Q2/CDC26/NHLRC1/UBE2Q1/TRIM32/FZR1/ANAPC13/ANAPC1/UBA6/UBE2J2/KLHL13/TRIM37/CUL1/CDC27/DDB1/UBE2D2/UBE2O/UBE2F/UBE2R2/UBE2K/RBX1/COP1/CDC34/CUL2/UBE2G1/UBE3C/UBE2A/ELOB/BRCA1/SKP2/UBE2E3/KEAP1/ANAPC7/ANAPC5/UBE2Z/UBE2L3/SAE1/UBA2/UBE2N/ANAPC11/ELOC/RNF7/UBE2M/PRPF19/CBLC/UBE2C/UBE2S/CDC20
Purine metabolism	Purine metabolism	Purine metabolism	158	-0.455106	-1.90758	3.57470565226874e-09	3.57470565226874e-09	2.25770883301183e-08	5049	tags=42%, list=9%, signal=39%	POLR3B/POLR2B/POLE/NME2/ADK/PRPS1/PNP/ADSS1/POLR3C/ADCY3/IMPDH1/POLR2E/NUDT5/POLR1A/POLR3D/DCK/GDA/NT5M/POLD1/CANT1/POLR1E/POLR2I/PRUNE1/GUK1/IMPDH2/NT5C/POLA2/ADCY10/PDE6D/ADSS2/ITPA/POLR2K/POLR3G/POLR1D/NUDT2/PRPS2/POLE4/POLR1B/POLR1H/PNPT1/POLR2D/POLE2/PRIM1/POLR1C/RRM1/POLR3K/AK4/NME4/PPAT/ADA/POLR2J/POLR2F/POLR2G/PRIM2/GMPS/ATIC/APRT/GART/DGUOK/POLE3/POLR2H/POLD2/HPRT1/PAICS/RRM2/NME1/PKM
Nucleotide excision repair	Nucleotide excision repair	Nucleotide excision repair	44	-0.699307	-2.48947	9.45208306045173e-09	9.45208306045173e-09	5.59662812789905e-08	5706	tags=61%, list=10%, signal=55%	ERCC3/GTF2H1/CUL4B/POLE/ERCC2/POLD1/GTF2H5/LIG1/MNAT1/DDB1/RBX1/ERCC1/RPA1/CDK7/POLE4/POLE2/RPA3/GTF2H3/RAD23A/RAD23B/RFC3/RFC5/POLE3/RFC4/RFC2/PCNA/POLD2
Hematopoietic cell lineage	Hematopoietic cell lineage	Hematopoietic cell lineage	84	0.639344437174844	1.94958003950373	1.31299261019178e-08	1.31299261019178e-08	7.13715059142753e-08	10661	tags=62%, list=19%, signal=50%	CD34/IL3RA/ITGA1/IL11RA/CSF3R/EPOR/IL5RA/IL6R/CD36/IL1R1/CD37/CD33/IL7R/GP9/CD1C/CD55/CD4/CD22/ITGAM/FLT3/HLA-DRB1/FLT3LG/CR1/HLA-DRB5/GP5/KIT/HLA-DRA/CD1E/GP1BA/ITGA4/CSF1/CD5/CD1D/ANPEP/CSF3/CSF2RA/IL4/CSF1R/IL7/CD59/KITLG/IL4R/IL5/CD1B/ITGA2B/MS4A1/CD2/CD3E/MME/FCGR1A/CD38/CD3G
Oocyte meiosis	Oocyte meiosis	Oocyte meiosis	113	-0.501703	-2.06453	1.35605861237123e-08	1.35605861237123e-08	7.13715059142753e-08	4965	tags=42%, list=9%, signal=38%	PPP2R1B/CHP2/CDC26/PRKX/PPP2R5D/ADCY3/CCNE2/ANAPC13/ANAPC1/CALML5/PPP2CA/CUL1/PPP1CB/CDC27/FBXO43/CDK2/RBX1/MAPK12/MAP2K1/CALML3/FBXO5/PPP2R1A/ANAPC7/ANAPC5/PPP3R1/YWHAE/MAD2L2/ESPL1/PPP1CC/ANAPC11/PPP1CA/CCNE1/YWHAG/YWHAQ/SGO1/PKMYT1/CDC25C/BUB1/YWHAZ/AURKA/PTTG1/CDK1/PLK1/MAD2L1/CDC20/CCNB2/CCNB1
Leukocyte transendothelial migration	Leukocyte transendothelial migration	Leukocyte transendothelial migration	115	0.59820127773384	1.88488625505778	1.86799321666947e-08	1.86799321666947e-08	9.08522107352499e-08	8542	tags=44%, list=15%, signal=38%	JAM2/CDH5/CLDN18/RAPGEF3/ESAM/PECAM1/ACTN2/AFDN/PIK3R5/ITGAL/TXK/RAPGEF4/OCLN/PRKCB/CLDN5/JAM3/PIK3R1/RASSF5/ICAM1/ITGAM/RAP1A/ROCK1/CYBB/CXCL12/PIK3CG/MYL9/PLCG2/NCF4/ITK/ROCK2/GNAI2/NCF2/ITGA4/PTK2B/ITGB2/PIK3R3/NCF1/CTNND1/VAV1/EZR/CLDN23/PIK3CD/PRKCA/PLCG1/RHOA/ARHGAP5/CLDN2/CLDN11/CLDN15/SIPA1/CTNNA1
RNA degradation	RNA degradation	RNA degradation	59	-0.628758	-2.38646	1.91799111552194e-08	1.91799111552194e-08	9.08522107352499e-08	4995	tags=47%, list=9%, signal=43%	PATL1/PAPOLG/DCPS/LSM6/CNOT3/C1D/PAPOLA/EXOSC7/ZCCHC7/LSM3/EXOSC3/WDR61/MPHOSPH6/EDC3/LSM1/HSPA9/PNPT1/EXOSC1/EXOSC2/LSM7/CNOT9/LSM5/LSM2/ENO1/EXOSC4/HSPD1/LSM4/EXOSC5
Citrate cycle (TCA cycle)	Citrate cycle (TCA cycle)	Citrate cycle (TCA cycle)	31	-0.77225	-2.52411	2.4039986040297e-08	2.4039986040297e-08	1.08451064843445e-07	5276	tags=65%, list=9%, signal=59%	ACO2/IDH3G/OGDHL/SDHD/IDH3B/DLAT/ACLY/PDHA1/IDH3A/SUCLG1/PC/CS/DLD/IDH1/IDH2/SDHB/FH/MDH1/SDHC/MDH2
Cytokine-cytokine receptor interaction	Cytokine-cytokine receptor interaction	Cytokine-cytokine receptor interaction	262	0.506960176995474	1.67898380422361	5.74400817676785e-08	5.74400817676785e-08	2.47349634406271e-07	12113	tags=42%, list=21%, signal=33%	VEGFD/LIFR/TGFBR2/CCL14/ACVRL1/IL6ST/BMPR2/IL3RA/KDR/FLT4/HGF/IL11RA/CSF3R/TNFSF13/CX3CR1/CD40LG/LEPR/IL10RB/EPOR/CCL23/IL5RA/IL6R/IL1R1/CXCL2/TNFSF12/TNFRSF19/IL7R/IL10RA/CCL16/TNFRSF10C/CXCL16/FLT3/TNFRSF14/CXCL12/IFNAR1/PLEKHO2/FLT3LG/MPL/CSF2RB/EDA2R/TNFSF14/TNFRSF1B/KIT/TNFSF15/IL18R1/CCR2/TGFB2/CCR4/IL2/BMP2/CXCL3/CCR1/IFNAR2/CSF1/FLT1/CCR6/CTF1/PDGFRA/IL18RAP/CXCR2/CSF3/TNFRSF10D/IL17RB/PP…
RNA polymerase	RNA polymerase	RNA polymerase	29	-0.769203	-2.50324	6.24902585194054e-08	6.24902585194054e-08	2.5019894383846e-07	7437	tags=79%, list=13%, signal=69%	POLR2C/POLR3A/POLR3F/POLR3B/POLR2B/POLR3C/POLR2E/POLR1A/POLR3D/POLR1E/POLR2I/POLR2K/POLR3G/POLR1D/POLR1B/POLR1H/POLR2D/POLR1C/POLR3K/POLR2J/POLR2F/POLR2G/POLR2H
Homologous recombination	Homologous recombination	Homologous recombination	28	-0.769019	-2.4617	6.33837324390766e-08	6.33837324390766e-08	2.5019894383846e-07	7078	tags=61%, list=12%, signal=53%	RPA2/NBN/XRCC3/BRCA2/POLD1/RAD51C/RPA1/RAD54B/EME1/RPA3/BLM/XRCC2/RAD54L/SEM1/POLD2/SSBP1/RAD51
Mismatch repair	Mismatch repair	Mismatch repair	23	-0.7906	-2.43677	2.07846589700974e-07	2.07846589700974e-07	7.87629182024742e-07	2978	tags=61%, list=5%, signal=58%	POLD1/LIG1/MSH2/MSH6/RPA1/RPA3/RFC3/RFC5/RFC4/RFC2/PCNA/POLD2/EXO1/SSBP1
Complement and coagulation cascades	Complement and coagulation cascades	Complement and coagulation cascades	69	0.646824605943789	1.94315124001497	3.89625307215725e-07	3.89625307215725e-07	1.41968735422734e-06	9044	tags=51%, list=16%, signal=43%	F11/A2M/C7/MASP2/F8/VWF/F10/C4BPA/CPB2/C8B/SERPING1/CFD/C4A/MASP1/PROS1/C5AR1/C4B/C6/C5/KLKB1/CD55/TFPI/CR1/C3/CFI/C2/SERPIND1/C3AR1/C1QA/SERPINA1/C1QB/CD59/F13A1/CFH/C1QC
Jak-STAT signaling pathway	Jak-STAT signaling pathway	Jak-STAT signaling pathway	155	0.537223452007517	1.74286328290075	7.06576538491196e-07	7.06576538491196e-07	2.47921592453051e-06	12850	tags=47%, list=23%, signal=37%	LIFR/IL6ST/IL3RA/PIK3R5/IL11RA/CSF3R/SPRY4/LEPR/IL10RB/EPOR/IL5RA/IL6R/STAT5B/SPRY1/SOS2/CISH/IL7R/PIK3R1/IL10RA/JAK1/STAT5A/PIAS1/IFNAR1/PIK3CG/MPL/SPRED1/STAT4/JAK2/CSF2RB/IL2/PIK3R3/IFNAR2/CTF1/SPRY2/PIK3CD/STAT6/STAT3/CSF3/IRF9/CSF2RA/IL4/IL12RB1/CCND3/IL7/STAM2/PTPN6/CBL/CREBBP/SOCS2/SPRED2/SOCS3/IL4R/IL13/IL5/CNTFR/TYK2/CCND2/IL12B/IL13RA1/AKT3/SOCS4/SPRY3/LIF/IFNLR1/IL15/EP300/IFNA5/IL2RG/…
Chemokine signaling pathway	Chemokine signaling pathway	Chemokine signaling pathway	187	0.513556	1.67597925067883	9.91638532299012e-07	9.91638532299012e-07	3.35516796642523e-06	7717	tags=37%, list=14%, signal=32%	ADCY4/GRK5/SHC3/ADCY9/RASGRP2/CCL14/GNG7/ADCY6/ARRB1/PIK3R5/PLCB2/CX3CR1/FGR/CCL23/ARRB2/STAT5B/DOCK2/CXCL2/SOS2/GNG2/PREX1/PRKCB/GNG11/PIK3R1/CCL16/PRKCD/CXCL16/PRKCZ/WAS/GRK3/RAP1A/ROCK1/CXCL12/PIK3CG/ADCY7/JAK2/ITK/ROCK2/GNAI2/CCR2/PTK2B/CCR4/ELMO1/PIK3R3/CXCL3/SHC2/CCR1/NCF1/CCR6/VAV1/NFKBIA/GNGT2/PIK3CD/STAT3/CXCR2/PPBP/IKBKB/CXCR1/FOXO3/PF4/BRAF/CCL2/CX3CL1/CCR7/CCR5/RHOA/XCR1/RAF1/MAPK3
Base excision repair	Base excision repair	Base excision repair	35	-0.678853	-2.29891	1.35740348112753e-06	1.35740348112753e-06	4.43434894016254e-06	7077	tags=63%, list=12%, signal=55%	PARP2/MPG/MBD4/POLE/HMGB1/POLD1/LIG1/LIG3/POLB/PARP1/POLE4/POLE2/TDG/APEX1/APEX2/SMUG1/NEIL3/POLE3/PCNA/FEN1/POLD2/UNG
Autoimmune thyroid disease	Autoimmune thyroid disease	Autoimmune thyroid disease	50	0.66844987763564	1.91995740452987	2.29933459683033e-06	2.29933459683033e-06	7.26105662156945e-06	12940	tags=56%, list=23%, signal=43%	CD40LG/HLA-DOA/HLA-E/HLA-DMA/HLA-DPB1/HLA-DPA1/HLA-DRB1/HLA-DQB1/TSHB/HLA-DMB/HLA-DRB5/HLA-DRA/HLA-DQA1/IL2/IL4/CD86/HLA-F/PRF1/IL5/CD80/HLA-C/CD28/HLA-B/HLA-DQA2/FAS/IFNA5/HLA-G/HLA-DOB
Leishmania infection	Leishmania infection	Leishmania infection	70	0.623343396673597	1.86791995780875	2.4815368304467e-06	2.4815368304467e-06	7.58364396401369e-06	10445	tags=59%, list=18%, signal=48%	HLA-DOA/FOS/PRKCB/TLR2/TLR4/HLA-DMA/JAK1/HLA-DPB1/HLA-DPA1/JUN/ITGAM/HLA-DRB1/HLA-DQB1/CR1/HLA-DMB/HLA-DRB5/C3/NCF4/JAK2/HLA-DRA/NCF2/HLA-DQA1/TGFB2/ITGA4/ITGB2/NCF1/FCGR2C/NFKBIA/TRAF6/IL4/FCGR2A/PTPN6/MYD88/FCGR3A/PTGS2/MAPK3/FCGR3B/IL12B/HLA-DQA2/NFKB1/FCGR1A
Intestinal immune network for IgA production	Intestinal immune network for IgA production	Intestinal immune network for IgA production	45	0.681199874350096	1.92572540895111	4.05900354432312e-06	4.05900354432312e-06	1.20167868088513e-05	12940	tags=73%, list=23%, signal=57%	PIGR/TNFSF13/CD40LG/HLA-DOA/HLA-DMA/HLA-DPB1/HLA-DPA1/HLA-DRB1/CXCL12/HLA-DQB1/HLA-DMB/HLA-DRB5/MAP3K14/HLA-DRA/HLA-DQA1/ITGA4/IL2/IL4/CD86/ICOS/TNFRSF13B/IL5/CD80/CD28/TNFSF13B/CXCR4/HLA-DQA2/CCR9/IL15/ITGB7/CCL28/IL6/HLA-DOB
Neuroactive ligand-receptor interaction	Neuroactive ligand-receptor interaction	Neuroactive ligand-receptor interaction	272	0.461949122041511	1.52929145762506	9.28588862487754e-06	9.28588862487754e-06	2.6658053468548e-05	13853	tags=35%, list=24%, signal=27%	GRIA1/NMUR1/VIPR1/EDNRB/PTH1R/ADRB2/S1PR1/ADRB1/ADRA1A/PTGIR/SSTR1/GRIK4/AGTR1/SCTR/LEPR/THRA/RXFP1/AVPR2/P2RY14/CHRM1/CYSLTR1/CHRNA10/CALCRL/S1PR4/GIPR/P2RX1/AGTR2/P2RX7/PTGFR/P2RY13/C5AR1/CTSG/EDNRA/PTGER4/PTGDR/RXFP2/CHRM2/S1PR2/CNR1/GRID1/TSHB/F2RL3/FPR2/PTGER2/DRD1/TBXA2R/NPFFR1/GABBR1/ADRA2A/P2RY8/ADCYAP1R1/THRB/HTR1F/C3AR1/NR3C1/ADORA2A/ADRA1B/FPR1/P2RX2/APLNR/PTAFR/NPY1R/GRM6/GLP1R/NMBR/F…
Glutathione metabolism	Glutathione metabolism	Glutathione metabolism	49	-0.567636	-2.05476	9.60804245838714e-06	9.60804245838714e-06	2.67716353329673e-05	6294	tags=51%, list=11%, signal=45%	GSTO2/GPX7/OPLAH/GSTM3/GSTM4/GPX4/GSTZ1/TXNDC12/ODC1/IDH1/GSTO1/GSR/IDH2/GGCT/G6PD/GCLC/RRM1/GPX2/GSS/PGD/GCLM/SMS/GSTP1/SRM/RRM2
Dilated cardiomyopathy	Dilated cardiomyopathy	Dilated cardiomyopathy	90	0.571330854658045	1.76237207816731	1.00106250964289e-05	1.00106250964289e-05	2.7096428832439e-05	8993	tags=43%, list=16%, signal=37%	ITGA8/ADCY4/CACNA2D2/SGCA/ADCY9/DES/ITGA9/ADRB1/ITGA10/CACNA1D/TNNC1/CACNA1C/ADCY6/LAMA2/ITGA1/SGCG/MYL3/CACNB4/ITGA7/SGCD/CACNB1/SLC8A1/ADCY7/RYR2/TGFB2/ITGA4/DMD/TTN/PLN/CACNA1F/ITGB6/MYBPC3/CACNG4/CACNG6/CACNA1S/CACNB2/ITGA2B/CACNA2D4/SGCB
Asthma	Asthma	Asthma	28	0.735134840216362	1.93239	1.42219479006415e-05	1.42219479006415e-05	3.74261786858988e-05	8141	tags=68%, list=14%, signal=58%	MS4A2/CD40LG/HLA-DOA/HLA-DMA/HLA-DPB1/HLA-DPA1/FCER1A/HLA-DRB1/HLA-DQB1/HLA-DMB/HLA-DRB5/EPX/HLA-DRA/HLA-DQA1/IL4/FCER1G/IL13/IL5/PRG2
Pentose phosphate pathway	Pentose phosphate pathway	Pentose phosphate pathway	27	-0.700472	-2.20705	1.70447343247772e-05	1.70447343247772e-05	4.32745739283061e-05	5139	tags=59%, list=9%, signal=54%	PFKL/PRPS1/RPIA/TKT/PGLS/ALDOC/ALDOA/PRPS2/G6PD/PGM2/DERA/RPE/TALDO1/PGD/PFKP/GPI
p53 signaling pathway	p53 signaling pathway	p53 signaling pathway	68	-0.506895	-1.95043	1.73579124312428e-05	1.73579124312428e-05	4.32745739283061e-05	4055	tags=35%, list=7%, signal=33%	CCNE2/TP53AIP1/BAX/CDKN2A/CDK2/COP1/IGFBP3/EI24/CASP3/PMAIP1/CHEK2/BID/CCNE1/SERPINB5/GTSE1/CDK4/CYCS/PERP/SFN/CHEK1/CDK1/RRM2/CCNB2/CCNB1
Glycolysis / Gluconeogenesis	Glycolysis / Gluconeogenesis	Glycolysis / Gluconeogenesis	60	-0.529188	-2.01936	2.3252219342584e-05	2.3252219342584e-05	5.5781372036903e-05	5139	tags=43%, list=9%, signal=39%	PFKL/LDHB/HK2/AKR1A1/ADH5/DLAT/PDHA1/PGAM4/ALDH3A1/ALDOC/HK1/ADH7/ALDH1B1/DLD/ALDOA/PGM2/ALDH3B2/PFKP/PGK1/ENO1/GPI/LDHA/PGAM1/PKM/TPI1/GAPDH
Allograft rejection	Allograft rejection	Allograft rejection	35	0.698212046359167	1.89802587409891	2.35521348600257e-05	2.35521348600257e-05	5.5781372036903e-05	13760	tags=83%, list=24%, signal=63%	CD40LG/HLA-DOA/HLA-E/HLA-DMA/HLA-DPB1/HLA-DPA1/HLA-DRB1/HLA-DQB1/HLA-DMB/HLA-DRB5/HLA-DRA/HLA-DQA1/IL2/IL4/CD86/HLA-F/PRF1/IL5/CD80/HLA-C/CD28/HLA-B/IL12B/HLA-DQA2/FAS/HLA-G/IL12A/HLA-DOB/TNF
Lysosome	Lysosome	Lysosome	121	0.526363957875235	1.66088855266799	4.27798947454923e-05	4.27798947454923e-05	9.88495642386215e-05	9557	tags=46%, list=17%, signal=39%	GGA2/CLN3/SLC11A1/CTSO/NAPSA/SORT1/GALC/ATP6V0A1/CTSH/ASAH1/LAMP3/DNASE2B/HYAL1/CLN5/CTSG/CTSS/SMPD1/NPC2/ACP5/TPP1/FUCA1/MCOLN1/AP4B1/PLA2G15/LIPA/GGA3/CTSF/LGMN/CTSZ/AP1S2/TCIRG1/CD68/LAPTM5/SGSH/CTSE/CTSW/ATP6V0C/MAN2B1/GNS/SLC17A5/SLC11A2/IDUA/CTNS/ATP6V0D2/MFSD8/MANBA/IDS/CTSD/GNPTAB/SCARB2/GUSB/ARSB/ATP6V0D1/HEXB/AP3S2/AP4S1
Protein export	Protein export	Protein export	24	-0.69413	-2.16363	5.20106755050884e-05	5.20106755050884e-05	0.000117317313169372	5745	tags=54%, list=10%, signal=49%	SPCS2/IMMP1L/SRP14/SEC11A/SPCS1/SRP72/SRP9/SRP68/HSPA5/SEC61B/SEC61G/SEC61A1/SRPRB
Focal adhesion	Focal adhesion	Focal adhesion	199	0.469148420081947	1.5400170821816	0.000105107761188863	0.000105107761188863	0.000231571566878768	9951	tags=39%, list=17%, signal=32%	TNXB/ITGA8/VEGFD/ILK/COL6A6/SHC3/COL4A4/ITGA9/ITGA10/VWF/RASGRF1/LAMB2/ACTN2/CAV3/KDR/FLT4/LAMA2/HGF/ITGA1/PIK3R5/PARVG/PDPK1/SOS2/PRKCB/LAMA4/TNR/ITGA7/PARVA/PIK3R1/FYN/TLN1/LAMC3/JUN/CAV1/RAP1A/ROCK1/CAPN2/PIK3CG/MYL9/MYLK/ROCK2/DOCK1/ITGA4/PIK3R3/SHC2/FLT1/VAV1/PIK3CD/PDGFRA/THBS1/RAPGEF1/ITGB6/THBS3/PDGFRB/CCND3/CHAD/PRKCA/BRAF/PDGFB/MYLK3/RHOA/ARHGAP5/RAF1/MAPK3/XIAP/PDGFD/FN1/CAV2/FLNA/ITGA…
Calcium signaling pathway	Calcium signaling pathway	Calcium signaling pathway	178	0.477910522224832	1.55734540875663	0.00012415254384307	0.00012415254384307	0.000267314089614265	13151	tags=46%, list=23%, signal=36%	ADCY4/EDNRB/PLCE1/ADCY9/ADRB2/GNAQ/ADRB1/CACNA1D/TNNC1/CACNA1C/ADRA1A/ERBB4/PDE1B/GNA14/AGTR1/PLCB2/CHRM1/CYSLTR1/PDE1C/P2RX1/ITPR1/PRKCB/P2RX7/PTGFR/EDNRA/SLC8A1/PHKG1/CHRM2/ADCY7/PLCG2/MYLK/DRD1/RYR2/ITPR2/PTK2B/TBXA2R/PLN/CACNA1F/SLC8A3/PPP3CC/BST1/CAMK2A/PDGFRA/CACNA1H/ATP2A3/TRPC1/ATP2B4/ADORA2A/ERBB3/PDGFRB/ADRA1B/ITPR3/P2RX2/PTAFR/PRKCA/PLCG1/CACNA1S/MYLK3/CAMK4/SLC25A4/CAMK2D/CALM1/GNA11/…
Basal transcription factors	Basal transcription factors	Basal transcription factors	35	-0.58963	-1.99676	0.000170925648385535	0.000170925648385535	0.000359843470285337	6779	tags=57%, list=12%, signal=50%	TAF7/TBP/TAF12/TAF11/GTF2F1/TAF5L/GTF2H1/TAF13/TAF6/TAF2/TAF5/GTF2IRD1/TAF4B/GTF2F2/TAF9/TBPL1/GTF2H3/GTF2E1/GTF2E2/GTF2A2
Glyoxylate and dicarboxylate metabolism	Glyoxylate and dicarboxylate metabolism	Glyoxylate and dicarboxylate metabolism	15	-0.770469	-2.12326	0.000175955021566193	0.000175955021566193	0.000362378762950969	2902	tags=67%, list=5%, signal=63%	ACO2/GRHPR/AFMID/MTHFD1/CS/PGP/MTHFD1L/MDH1/MTHFD2/MDH2
Graft-versus-host disease	Graft-versus-host disease	Graft-versus-host disease	37	0.659989258569084	1.82211381411954	0.000187050216858303	0.000187050216858303	0.000377032911920432	14517	tags=76%, list=25%, signal=56%	HLA-DOA/HLA-E/HLA-DMA/HLA-DPB1/HLA-DPA1/HLA-DRB1/HLA-DQB1/HLA-DMB/HLA-DRB5/HLA-DRA/HLA-DQA1/IL2/CD86/HLA-F/PRF1/CD80/KIR3DL1/HLA-C/KLRD1/CD28/HLA-B/HLA-DQA2/FAS/HLA-G/IL6/HLA-DOB/TNF/KIR2DL3
N-Glycan biosynthesis	N-Glycan biosynthesis	N-Glycan biosynthesis	46	-0.522451	-1.85665	0.000198189862238443	0.000198189862238443	0.0003911642017864	7406	tags=50%, list=13%, signal=44%	DPAGT1/TUSC3/ALG14/DPM3/B4GALT1/ALG6/DPM2/MOGS/STT3A/RFT1/DAD1/ALG8/MAN1B1/DPM1/GANAB/ALG10/B4GALT3/RPN2/DDOST/DOLPP1/B4GALT2/RPN1/ALG3
Progesterone-mediated oocyte maturation	Progesterone-mediated oocyte maturation	Progesterone-mediated oocyte maturation	85	-0.412028	-1.63733	0.000241412521760143	0.000241412521760143	0.00046674816237192	5384	tags=39%, list=9%, signal=35%	CDC23/AKT2/MAPK13/KRAS/PIK3CA/CCNA1/CDC26/PRKX/ADCY3/FZR1/ANAPC13/ANAPC1/CDC27/CDK2/MAPK12/GNAI3/HSP90AA1/MAP2K1/ANAPC7/ANAPC5/HSP90AB1/MAD2L2/ANAPC11/CDC25A/PKMYT1/CDC25C/BUB1/CDK1/PLK1/MAD2L1/CCNA2/CCNB2/CCNB1
Hypertrophic cardiomyopathy (HCM)	Hypertrophic cardiomyopathy (HCM)	Hypertrophic cardiomyopathy (HCM)	83	0.546635162586287	1.66816090321001	0.000265205066696619	0.000265205066696619	0.000502493810583067	8993	tags=42%, list=16%, signal=36%	ITGA8/CACNA2D2/SGCA/DES/ITGA9/ITGA10/CACNA1D/TNNC1/ACE/CACNA1C/LAMA2/ITGA1/SGCG/MYL3/CACNB4/ITGA7/SGCD/CACNB1/SLC8A1/RYR2/TGFB2/PRKAB1/ITGA4/DMD/TTN/CACNA1F/ITGB6/MYBPC3/CACNG4/CACNG6/CACNA1S/CACNB2/ITGA2B/CACNA2D4/SGCB
Phosphatidylinositol signaling system	Phosphatidylinositol signaling system	Phosphatidylinositol signaling system	76	0.548341491738336	1.6608800691948	0.000369919844038563	0.000369919844038563	0.000681596212604734	9963	tags=49%, list=17%, signal=40%	PLCE1/SYNJ1/PIK3R5/PLCB2/INPP5B/PIP5K1B/PIK3C2A/ITPR1/PRKCB/PIK3R1/INPP5K/INPP5D/PIK3CG/PLCG2/DGKD/PIKFYVE/ITPR2/PIK3C2B/INPP5A/PIK3R3/INPP5J/PIK3CD/PIP4K2B/ITPR3/PRKCA/PLCG1/PIP4K2A/INPPL1/CDS2/PI4KA/INPP4A/CALM1/CDS1/PIP5K1C/DGKH/PTEN/ITPKB
Type I diabetes mellitus	Type I diabetes mellitus	Type I diabetes mellitus	41	0.616731576253233	1.71973903508425	0.000374120587807487	0.000374120587807487	0.000681596212604734	13760	tags=68%, list=24%, signal=52%	HLA-DOA/HLA-E/HLA-DMA/HLA-DPB1/HLA-DPA1/PTPRN2/HLA-DRB1/HLA-DQB1/HLA-DMB/HLA-DRB5/HLA-DRA/HLA-DQA1/IL2/CD86/HLA-F/PRF1/CD80/ICA1/HLA-C/CD28/HLA-B/IL12B/HLA-DQA2/FAS/HLA-G/IL12A/HLA-DOB/TNF
Fc epsilon RI signaling pathway	Fc epsilon RI signaling pathway	Fc epsilon RI signaling pathway	79	0.54059031452027	1.64123945476356	0.000458682296338417	0.000458682296338417	0.000819888911031926	9799	tags=47%, list=17%, signal=39%	PRKCE/MS4A2/PLA2G1B/PIK3R5/BTK/GAB2/PDPK1/SOS2/PLA2G5/PRKCB/PIK3R1/FYN/PRKCD/FCER1A/INPP5D/PIK3CG/PLCG2/PLA2G12A/PIK3R3/LCP2/VAV1/PIK3CD/IL4/LAT/PRKCA/PLCG1/FCER1G/PLA2G12B/PLA2G10/RAF1/MAPK3/IL13/IL5/JMJD7-PLA2G4B/AKT3/MAPK9/MAPK10
Viral myocarditis	Viral myocarditis	Viral myocarditis	68	0.561098599698127	1.68012726451497	0.000519760135709439	0.000519760135709439	0.000911859887209543	9778	tags=54%, list=17%, signal=45%	SGCA/MYH10/LAMA2/CD40LG/ITGAL/SGCG/HLA-DOA/HLA-E/HLA-DMA/SGCD/FYN/ICAM1/MYH11/HLA-DPB1/HLA-DPA1/CD55/MYH2/CAV1/HLA-DRB1/HLA-DQB1/HLA-DMB/HLA-DRB5/HLA-DRA/HLA-DQA1/DMD/ITGB2/CD86/HLA-F/PRF1/CD80/HLA-C/CD28/SGCB/HLA-B/CASP8/MYH1/HLA-DQA2
MAPK signaling pathway	MAPK signaling pathway	MAPK signaling pathway	267	0.428256148335727	1.41701277952236	0.00074173473350668	0.00074173473350668	0.00127762920604021	12677	tags=41%, list=22%, signal=32%	RAPGEF2/CACNA2D2/MAP3K3/RASGRP4/RASGRP2/TGFBR2/CACNA1D/RASGRF1/PLA2G1B/RPS6KA2/CACNA1C/ARRB1/MEF2C/IL1R1/ARRB2/TAOK2/FGFR4/MAP3K12/DUSP8/SOS2/NFATC2/FOS/GADD45B/PLA2G5/PRKCB/FGF10/FGF18/NR4A1/CACNB4/MAP3K8/JUND/RASGRP3/FGF7/CACNB1/RPS6KA3/DUSP1/JUN/MRAS/FGF14/RAP1A/PTPN5/TAOK3/MAP3K14/TGFB2/DUSP6/PLA2G12A/STK4/CACNA1F/PPP3CC/FGF2/RPS6KA1/DUSP3/PDGFRA/CACNA1H/IKBKB/TRAF6/MECOM/HSPA1L/RRAS/FGF9/PDG…
Endocytosis	Endocytosis	Endocytosis	181	0.455388826464951	1.48538035045431	0.000791315323584312	0.000791315323584312	0.00133869133689075	9186	tags=39%, list=16%, signal=33%	GRK5/ADRB2/ADRB1/MVB12B/RBSN/IQSEC1/ERBB4/ARRB1/KDR/RAB11FIP2/IQSEC3/PIP5K1B/ARRB2/FGFR4/PARD6B/ASAP3/EPS15/ARAP1/HLA-E/ARAP3/RAB11FIP1/DAB2/DNM3/GIT2/PRKCZ/PDCD6IP/GRK3/RAB11FIP3/ARAP2/AP2A2/SH3GL2/EHD2/PIKFYVE/KIT/SMURF2/DNM2/SMAP2/FLT1/SH3KBP1/CHMP4A/VPS36/PDGFRA/RUFY1/EHD1/CXCR2/PSD4/PIP4K2B/TRAF6/CXCR1/NEDD4L/RABEP1/HSPA1L/ERBB3/ACAP1/CSF1R/STAM2/LDLR/CBL/RAB11FIP4/HLA-F/CCR5/NTRK1/RAB5A/SH3…
Aldosterone-regulated sodium reabsorption	Aldosterone-regulated sodium reabsorption	Aldosterone-regulated sodium reabsorption	42	0.60457296389357	1.69377566940804	0.00106849364656808	0.00106849364656808	0.00177588971728767	11618	tags=50%, list=20%, signal=40%	NR3C2/ATP1A2/ATP1B2/PIK3R5/SCNN1B/PDPK1/SLC9A3R2/PRKCB/SCNN1G/PIK3R1/PIK3CG/PIK3R3/PIK3CD/NEDD4L/PRKCA/HSD11B1/MAPK3/INSR/SCNN1A/KCNJ1/ATP1A1
Fructose and mannose metabolism	Fructose and mannose metabolism	Fructose and mannose metabolism	34	-0.550578	-1.8484	0.00123641467008164	0.00123641467008164	0.00201955209269234	5554	tags=56%, list=10%, signal=50%	GMPPA/PMM2/PFKL/HK2/MTMR1/PFKFB4/GMDS/KHK/AKR1B1/MPI/ALDOC/HK1/MTMR2/ALDOA/GFUS/SORD/PFKP/AKR1B10/TPI1
Porphyrin and chlorophyll metabolism	Porphyrin and chlorophyll metabolism	Porphyrin and chlorophyll metabolism	41	-0.497437	-1.73956	0.00192398106702167	0.00192398106702167	0.00308935407728724	9482	tags=49%, list=17%, signal=41%	HMOX2/UGT2B17/UGT1A4/UGT1A9/COX15/UGT1A3/BLVRB/UGT1A10/MMAB/UROS/EARS2/FECH/UGT1A6/UGT1A7/COX10/UGT1A1/CPOX/EPRS1/HCCS/HMBS
Pyruvate metabolism	Pyruvate metabolism	Pyruvate metabolism	40	-0.478864	-1.66678	0.00218103696240537	0.00218103696240537	0.003443742572219	3907	tags=38%, list=7%, signal=35%	LDHB/GLO1/DLAT/PDHA1/AKR1B1/GRHPR/ACAT2/PC/ALDH1B1/DLD/ME1/MDH1/LDHA/MDH2/PKM
Cardiac muscle contraction	Cardiac muscle contraction	Cardiac muscle contraction	79	-0.378678	-1.49162	0.00270560158971028	0.00270560158971028	0.00420196968203495	6069	tags=37%, list=11%, signal=33%	CACNA2D1/COX7B2/CACNA2D3/COX7C/TNNI3/UQCR10/UQCRB/COX6B2/UQCR11/UQCRC2/TPM3/UQCRHL/UQCRQ/COX6C/ATP1B3/ATP2A2/COX4I1/COX7A2/COX7B/UQCRFS1/COX6A1/COX7A2L/COX6B1/COX8A/COX5B/UQCRH/UQCRC1/COX5A/CYC1
Pentose and glucuronate interconversions	Pentose and glucuronate interconversions	Pentose and glucuronate interconversions	28	-0.560124	-1.793	0.0030634697140023	0.0030634697140023	0.0046810233320918	12833	tags=68%, list=23%, signal=53%	UGT2B10/UGP2/UGT2B7/UGT2B28/UGT1A5/RPEL1/UGT2B17/UGT1A4/UGT1A9/UGT1A3/UGT1A10/DCXR/AKR1B1/UGT1A6/XYLB/UGT1A7/UGT1A1/UGDH/RPE
Tight junction	Tight junction	Tight junction	130	0.465436060610719	1.48058844354361	0.00338640631040196	0.00338640631040196	0.00509234031639393	10474	tags=41%, list=18%, signal=33%	PRKCE/JAM2/MAGI1/MAGI3/CLDN18/ACTN2/MYH10/MPDZ/AFDN/SPTAN1/TJP2/PARD6B/OCLN/PRKCB/CGN/CLDN5/JAM3/PRKCH/MYH11/PRKCD/PRKCZ/MYH2/TJP1/MRAS/EPB41L2/MYL9/GNAI2/PRKCQ/MAGI2/EPB41/CLDN23/PATJ/PPP2CB/LLGL2/RRAS/TJP3/ASH1L/EPB41L3/PRKCA/RHOA/CLDN2/CLDN11/CLDN15/CTNNA1/AKT3/HCLS1/MYH1/EPB41L1/PTEN/CLDN3/AMOTL1/MYH3/CLDN9
Natural killer cell mediated cytotoxicity	Natural killer cell mediated cytotoxicity	Natural killer cell mediated cytotoxicity	132	0.467205463955931	1.48817720872453	0.00393448951409906	0.00393448951409906	0.005824079872844	9106	tags=40%, list=16%, signal=34%	SHC3/PIK3R5/NFAT5/ITGAL/ICAM2/SOS2/NFATC2/HLA-E/PRKCB/PIK3R1/FYN/ICAM1/TNFRSF10C/IFNAR1/PIK3CG/PLCG2/PTK2B/ITGB2/PIK3R3/SHC2/IFNAR2/LCP2/VAV1/PPP3CC/NFATC1/PIK3CD/TYROBP/SH2D1B/TNFRSF10D/CD244/CD247/ZAP70/NCR3/NFATC3/LAT/PRKCA/PLCG1/NFATC4/PTPN6/SH3BP2/BRAF/FCGR3A/FCER1G/HCST/PRF1/RAF1/MAPK3/ARAF/KIR3DL1/HLA-C/FCGR3B/KLRD1/HLA-B
Arginine and proline metabolism	Arginine and proline metabolism	Arginine and proline metabolism	54	-0.429035	-1.56891	0.00401497860152492	0.00401497860152492	0.00585179067428733	5749	tags=35%, list=10%, signal=32%	GLUD1/OAT/ARG2/ALDH4A1/PYCR2/ODC1/ALDH1B1/GAMT/P4HA1/GOT1/AGMAT/CKMT1B/CKMT1A/SMS/PYCR1/ALDH18A1/PYCR3/GOT2/SRM
GnRH signaling pathway	GnRH signaling pathway	GnRH signaling pathway	101	0.476373507754092	1.48481120898525	0.00424775091056872	0.00424775091056872	0.00609725011086419	9810	tags=38%, list=17%, signal=31%	ADCY4/MAP3K3/ADCY9/GNAQ/CACNA1D/PLA2G1B/CACNA1C/ADCY6/PLCB2/SOS2/PLA2G5/ITPR1/PRKCB/GNRH1/PRKCD/JUN/ADCY7/ITPR2/PTK2B/PLA2G12A/CACNA1F/CAMK2A/ITPR3/PRKCA/CACNA1S/PLA2G12B/PLA2G10/MAP3K1/RAF1/MAPK3/CAMK2D/CALM1/GNA11/JMJD7-PLA2G4B/MAPK7/MAPK9/MAPK10/HBEGF
PPAR signaling pathway	PPAR signaling pathway	PPAR signaling pathway	69	0.512902507922779	1.54083059784456	0.0045736189126131	0.0045736189126131	0.00646701810110258	12678	tags=46%, list=22%, signal=36%	ILK/SORBS1/ACADL/LPL/RXRG/CYP27A1/OLR1/CD36/FABP4/PDPK1/ACOX2/SLC27A1/ACSL5/ACSL1/SCP2/CYP7A1/CYP4A22/ACAA1/AQP7/FABP3/ACSL4/CYP4A11/GK/PPARG/HMGCS2/NR1H3/CPT2/ACADM/ACOX3/SCD5/CYP8B1/SLC27A6
ABC transporters	ABC transporters	ABC transporters	44	0.566201678853087	1.59931779897481	0.00470268452192926	0.00470268452192926	0.00655172766213055	7795	tags=36%, list=14%, signal=31%	ABCA9/ABCA8/ABCA6/ABCC6/ABCA3/CFTR/ABCA10/ABCC9/ABCB1/ABCD4/ABCA7/ABCG2/ABCD3/ABCC4/ABCD2/ABCG1
Drug metabolism - other enzymes	Drug metabolism - other enzymes	Drug metabolism - other enzymes	51	-0.434982	-1.59469	0.00547024854972316	0.00547024854972316	0.00751063874103867	8127	tags=41%, list=14%, signal=35%	UGT1A4/UGT1A9/UCKL1/CES5A/UGT1A3/XDH/TYMP/UGT1A10/CDA/IMPDH1/UGT1A6/TPMT/UGT1A7/IMPDH2/UGT1A1/ITPA/UCK2/GMPS/UMPS/HPRT1/TK1
One carbon pool by folate	One carbon pool by folate	One carbon pool by folate	17	-0.648951	-1.84965	0.00563428736584583	0.00563428736584583	0.00762535132219736	2576	tags=59%, list=5%, signal=56%	ALDH1L1/MTHFD1/DHFR/MTFMT/TYMS/MTHFD1L/ATIC/GART/SHMT2/MTHFD2
Amino sugar and nucleotide sugar metabolism	Amino sugar and nucleotide sugar metabolism	Amino sugar and nucleotide sugar metabolism	44	-0.452672	-1.61147	0.0060883604421686	0.0060883604421686	0.00812383157591066	5554	tags=39%, list=10%, signal=35%	GMPPA/PMM2/NPL/UAP1/HK2/GALK1/GMDS/MPI/NANP/HK1/GFUS/GNPDA1/UGDH/PGM2/CMAS/GNPNAT1/GPI
T cell receptor signaling pathway	T cell receptor signaling pathway	T cell receptor signaling pathway	108	0.469590963951224	1.4734300473201	0.00634943497705444	0.00634943497705444	0.00835451970665058	10661	tags=46%, list=19%, signal=38%	PIK3R5/CD40LG/NFAT5/PDPK1/SOS2/NFATC2/FOS/GRAP2/MAP3K8/PIK3R1/FYN/PTPRC/JUN/CD4/PIK3CG/MAP3K14/TEC/ITK/PRKCQ/IL2/PIK3R3/LCP2/VAV1/PPP3CC/NFATC1/NFKBIA/PIK3CD/CD247/ZAP70/IKBKB/IL4/NFATC3/LAT/PLCG1/NFATC4/PTPN6/CBL/RHOA/RAF1/ICOS/MAPK3/IL5/RASGRP1/CD28/AKT3/MAPK9/CD3E/NFKB1/PPP3R2/CD3G
Arrhythmogenic right ventricular cardiomyopathy (ARVC)	Arrhythmogenic right ventricular cardiomyopathy (ARVC)	Arrhythmogenic right ventricular cardiomyopathy (ARVC)	74	0.511765633845653	1.54535013276385	0.00729356668908769	0.00729356668908769	0.0094653352850453	8993	tags=42%, list=16%, signal=35%	ITGA8/CACNA2D2/SGCA/DES/ITGA9/ITGA10/CACNA1D/ACTN2/CACNA1C/LAMA2/ITGA1/SGCG/CACNB4/ITGA7/SGCD/CACNB1/SLC8A1/TCF7L2/RYR2/ITGA4/DMD/CACNA1F/ITGB6/CACNG4/CACNG6/CACNA1S/CACNB2/CTNNA1/ITGA2B/CACNA2D4/SGCB
Cysteine and methionine metabolism	Cysteine and methionine metabolism	Cysteine and methionine metabolism	34	-0.483286	-1.62249	0.0102334940787419	0.0102334940787419	0.0131012015232826	7813	tags=50%, list=14%, signal=43%	DNMT1/AMD1/ADI1/MAT1A/MPST/CBS/IL4I1/SDS/LDHB/DNMT3B/GOT1/SMS/ENOPH1/GOT2/SRM/LDHA/AHCY
Pathogenic Escherichia coli infection	Pathogenic Escherichia coli infection	Pathogenic Escherichia coli infection	56	-0.390782	-1.44592	0.0103894660646802	0.0103894660646802	0.0131235360817014	6619	tags=39%, list=12%, signal=35%	TUBA3E/ARPC5/CDH1/ARPC4/TUBAL3/TUBB2A/TUBB4A/ARPC2/TUBB4B/CLDN1/TUBA4A/NCK1/NCL/ARPC3/ARPC5L/ACTG1/ARPC1A/TUBA1B/TUBB/YWHAQ/YWHAZ/TUBA1C
Renin-angiotensin system	Renin-angiotensin system	Renin-angiotensin system	17	0.654657522951961	1.55866444346727	0.0111903914390707	0.0111903914390707	0.0139492414060438	5907	tags=59%, list=10%, signal=53%	ACE/AGTR1/AGTR2/CPA3/CTSG/CMA1/REN/LNPEP/ANPEP/ENPEP
Long-term depression	Long-term depression	Long-term depression	70	0.494382707317939	1.4814744661172	0.0118021999616192	0.0118021999616192	0.0145208201851774	8816	tags=37%, list=15%, signal=31%	GRIA1/GUCY1A2/GNAQ/PLA2G1B/PLCB2/PRKG1/GUCY1A1/PLA2G5/ITPR1/PRKCB/GNAI2/ITPR2/PLA2G12A/PPP2CB/GUCY1B1/ITPR3/PRKG2/PRKCA/BRAF/PLA2G12B/PLA2G10/RAF1/MAPK3/ARAF/GNA11/JMJD7-PLA2G4B
Amyotrophic lateral sclerosis (ALS)	Amyotrophic lateral sclerosis (ALS)	Amyotrophic lateral sclerosis (ALS)	53	-0.398803	-1.44681	0.0120963479732427	0.0120963479732427	0.0146919206152746	7192	tags=38%, list=13%, signal=33%	NEFM/BAD/TP53/GRIN2D/MAPK13/CHP2/TOMM40L/TNFRSF1A/RAC1/BAX/NEFL/DAXX/DERL1/MAPK12/CASP3/SOD1/PPP3R1/BID/CYCS/TOMM40
Valine, leucine and isoleucine biosynthesis	Valine, leucine and isoleucine biosynthesis	Valine, leucine and isoleucine biosynthesis	11	-0.696324	-1.77549	0.0124472247404556	0.0124472247404556	0.0149267185428515	6596	tags=45%, list=12%, signal=40%	LARS2/PDHA1/IARS2/VARS1/IARS1
ECM-receptor interaction	ECM-receptor interaction	ECM-receptor interaction	83	0.478997955723632	1.46175313471451	0.0133370951197135	0.0133370951197135	0.0157697416482099	9072	tags=37%, list=16%, signal=31%	TNXB/ITGA8/COL6A6/COL4A4/ITGA9/ITGA10/VWF/LAMB2/LAMA2/ITGA1/CD36/LAMA4/TNR/GP9/ITGA7/LAMC3/GP5/CD47/GP1BA/ITGA4/SDC3/SDC4/THBS1/ITGB6/THBS3/CHAD/HSPG2/FN1/ITGA2B/GP6/SDC2
Lysine degradation	Lysine degradation	Lysine degradation	44	-0.425615	-1.51515	0.0135363075921926	0.0135363075921926	0.0157697416482099	6085	tags=41%, list=11%, signal=37%	BBOX1/HADHA/EHMT2/NSD2/AASDHPPT/GCDH/OGDHL/PLOD3/TMLHE/EHHADH/ACAT2/ALDH1B1/KMT5A/PLOD1/PLOD2/ECHS1/SUV39H2/SUV39H1
Alanine, aspartate and glutamate metabolism	Alanine, aspartate and glutamate metabolism	Alanine, aspartate and glutamate metabolism	32	-0.465523	-1.52983	0.0136495874932839	0.0136495874932839	0.0157697416482099	6893	tags=44%, list=12%, signal=38%	ASS1/CPS1/ADSL/IL4I1/GLUD1/ADSS1/ALDH4A1/GPT2/CAD/ADSS2/GOT1/PPAT/NIT2/GOT2
B cell receptor signaling pathway	B cell receptor signaling pathway	B cell receptor signaling pathway	75	0.485104022220427	1.46555107832811	0.0148433200862463	0.0148433200862463	0.016942280377453	10471	tags=43%, list=18%, signal=35%	PIK3R5/BTK/NFAT5/SOS2/NFATC2/FOS/PRKCB/LILRB3/RASGRP3/PIK3R1/JUN/INPP5D/CD22/PIK3CG/PLCG2/CD81/PIK3R3/VAV1/PPP3CC/NFATC1/NFKBIA/PIK3CD/IKBKB/NFATC3/NFATC4/PTPN6/RAF1/MAPK3/PIK3AP1/AKT3/NFKB1/PPP3R2
Type II diabetes mellitus	Type II diabetes mellitus	Type II diabetes mellitus	47	0.526864524290069	1.5093209440391	0.0153511627990565	0.0153511627990565	0.0171997844715554	9799	tags=40%, list=17%, signal=34%	PRKCE/CACNA1D/CACNA1C/PIK3R5/PIK3R1/HK3/PRKCD/PRKCZ/PIK3CG/PIK3R3/PIK3CD/IKBKB/SOCS2/SOCS3/MAPK3/INSR/SOCS4/MAPK9/MAPK10
Regulation of actin cytoskeleton	Regulation of actin cytoskeleton	Regulation of actin cytoskeleton	213	0.401761505889604	1.32060912211966	0.0154320288453122	0.0154320288453122	0.0171997844715554	8086	tags=32%, list=14%, signal=27%	ITGA8/ARHGEF6/ITGA9/ITGA10/ACTN2/MYH10/ITGA1/PIK3R5/FGD3/SSH2/PIP5K1B/ITGAL/CHRM1/APC/FGFR4/ABI2/SOS2/ARHGEF12/FGF10/NCKAP1L/FGF18/ITGAX/IQGAP2/CYFIP2/ITGA7/PIK3R1/CFL2/FGF7/WAS/CHRM2/MRAS/ITGAM/FGF14/ROCK1/PIK3CG/MYL9/MYLK/ROCK2/DOCK1/PIKFYVE/ITGA4/ARHGEF7/ITGB2/PIK3R3/VAV1/FGF2/EZR/PIK3CD/TMSB4X/PDGFRA/ARHGEF1/PIP4K2B/ITGB6/RRAS/FGF9/PDGFRB/PIP4K2A/BRAF/PDGFB/MYLK3/GSN/RHOA/RAF1/MAPK3/ARAF/PDGF…
Glycosylphosphatidylinositol(GPI)-anchor biosynthesis	Glycosylphosphatidylinositol(GPI)-anchor biosynthesis	Glycosylphosphatidylinositol(GPI)-anchor biosynthesis	24	-0.502766	-1.56714	0.018609124993914	0.018609124993914	0.0204996480961109	6544	tags=46%, list=11%, signal=41%	PIGS/PIGO/GPAA1/PIGT/PIGF/PIGN/DPM2/PIGW/PIGC/PIGU/PIGX
Inositol phosphate metabolism	Inositol phosphate metabolism	Inositol phosphate metabolism	54	0.494239544797831	1.43577530021426	0.0212275145827728	0.0212275145827728	0.0231152608886818	9963	tags=44%, list=17%, signal=37%	PLCE1/SYNJ1/PLCB2/INPP5B/PIP5K1B/PIK3C2A/INPP5K/PIK3CG/PLCG2/PIKFYVE/PIK3C2B/INPP5A/INPP5J/PIK3CD/ALDH6A1/PIP4K2B/PLCG1/PIP4K2A/INPPL1/PI4KA/INPP4A/PIP5K1C/PTEN/ITPKB
Linoleic acid metabolism	Linoleic acid metabolism	Linoleic acid metabolism	29	0.565442305815751	1.48747841946999	0.0282848580131318	0.0282848580131318	0.0304502059949984	15124	tags=59%, list=27%, signal=43%	PLA2G1B/CYP3A7/PLA2G5/PLA2G12A/ALOX15/CYP1A2/PLA2G12B/PLA2G10/CYP3A5/JMJD7-PLA2G4B/CYP2C8/PLA2G2C/PLA2G2A/CYP3A43/PLA2G6/PLA2G3/CYP2J2
Fc gamma R-mediated phagocytosis	Fc gamma R-mediated phagocytosis	Fc gamma R-mediated phagocytosis	96	0.436178378738731	1.3534400971377	0.0304347826086957	0.0304347826086957	0.0323965752191911	7717	tags=36%, list=14%, signal=32%	PRKCE/PIK3R5/PLPP3/PIP5K1B/GAB2/DOCK2/ASAP3/WASF3/PRKCB/PLA2G4F/PIK3R1/CFL2/PTPRC/PRKCD/DNM3/WAS/INPP5D/PIK3CG/PLCG2/PIKFYVE/PIK3R3/NCF1/DNM2/FCGR2C/VAV1/PIK3CD/PIP4K2B/FCGR2A/LAT/PRKCA/PLCG1/FCGR3A/GSN/RAF1/MAPK3
Adipocytokine signaling pathway	Adipocytokine signaling pathway	Adipocytokine signaling pathway	66	0.46226080885143	1.38048268633322	0.0371203599550056	0.0371203599550056	0.0390740631105322	10344	tags=35%, list=18%, signal=29%	ACACB/RXRG/AGRP/LEPR/CD36/ACSL5/ACSL1/JAK2/PRKCQ/TNFRSF1B/PRKAB1/NFKBIA/STAT3/IKBKB/ACSL4/SOCS3/G6PC2/AKT3/MAPK9/MAPK10/PRKAA1/PPARGC1A/NFKB1
alpha-Linolenic acid metabolism	alpha-Linolenic acid metabolism	alpha-Linolenic acid metabolism	19	0.60553739037926	1.47001380530619	0.0375838926174497	0.0375838926174497	0.0391272450615439	16342	tags=63%, list=29%, signal=45%	PLA2G1B/PLA2G5/PLA2G12A/PLA2G12B/PLA2G10/JMJD7-PLA2G4B/ACOX3/PLA2G2C/PLA2G2A/PLA2G6/PLA2G3/ACOX1
Ascorbate and aldarate metabolism	Ascorbate and aldarate metabolism	Ascorbate and aldarate metabolism	25	-0.480386	-1.49486	0.0385761410201075	0.0385761410201075	0.0395273284419833	11512	tags=52%, list=20%, signal=42%	UGT2B7/UGT2B28/UGT1A5/UGT2B17/UGT1A4/UGT1A9/UGT1A3/UGT1A10/UGT1A6/UGT1A7/UGT1A1/ALDH1B1/UGDH
TGF-beta signaling pathway	TGF-beta signaling pathway	TGF-beta signaling pathway	86	0.435804302919044	1.33435400618015	0.0388026607538803	0.0388026607538803	0.0395273284419833	11675	tags=41%, list=20%, signal=32%	LEFTY2/BMP5/SMAD6/TGFBR2/ACVRL1/BMPR2/SMAD7/ID4/SMAD9/RBL2/ZFYVE16/ROCK1/ROCK2/DCN/TGFB2/SMURF2/BMP2/ID2/PPP2CB/THBS1/THBS3/BMP4/CREBBP/BMP6/RHOA/MAPK3/ZFYVE9/NOG/CDKN2B/GDF7/SMAD4/BMPR1A/AMHR2/EP300/GDF5
NOD-like receptor signaling pathway	NOD-like receptor signaling pathway	NOD-like receptor signaling pathway	62	0.462120267604844	1.36570308444793	0.0402298850574713	0.0402298850574713	0.0404907738879498	13760	tags=50%, list=24%, signal=38%	CARD8/NOD1/NLRC4/CXCL2/NLRP3/NLRP1/MEFV/CARD9/NFKBIA/ERBIN/CARD6/IKBKB/TRAF6/CCL2/NAIP/MAPK3/XIAP/BIRC3/CASP8/MAPK9/MAPK10/CASP1/NFKB1/PSTPIP1/TAB3/IL6/TNFAIP3/CASP5/SUGT1/CCL13/TNF
Arachidonic acid metabolism	Arachidonic acid metabolism	Arachidonic acid metabolism	58	0.475304903693708	1.39018247619242	0.0406032482598608	0.0406032482598608	0.0404907738879498	8816	tags=40%, list=15%, signal=34%	PTGDS/PLA2G1B/LTC4S/CYP2U1/ALOX5/HPGDS/PLA2G5/ALOX15B/GPX3/PTGIS/LTA4H/TBXAS1/PLA2G12A/CYP4A22/GGT7/ALOX15/PLA2G12B/CYP4A11/PLA2G10/PTGS2/EPHX2/GGT1/JMJD7-PLA2G4B
Primary bile acid biosynthesis	Primary bile acid biosynthesis	Primary bile acid biosynthesis	16	0.625373206471813	1.46838110199139	0.0440165061898212	0.0440165061898212	0.043437341634692	8693	tags=56%, list=15%, signal=48%	HSD17B4/CYP27A1/ACOX2/SCP2/CYP7A1/CYP7B1/CYP46A1/CH25H/CYP39A1

## Sheet: GSEA_RRM2_KEGG_gsea
	ID	Description	setSize	enrichmentScore	NES	pvalue	p.adjust	qvalue	rank	leading_edge	core_enrichment
Cell cycle	Cell cycle	Cell cycle	125	0.795013509504761	2.84405650569058	6.0377068424744e-32	6.0377068424744e-32	5.84704241586995e-30	3454	tags=59%, list=6%, signal=56%	CCNB2/CCNA2/BUB1/CCNB1/CDC6/CDC20/PLK1/BUB1B/CDK1/ORC1/MAD2L1/TTK/CDC45/CHEK1/MCM6/MCM4/CDC25A/CDC25C/ESPL1/ORC6/PTTG1/DBF4/PKMYT1/PCNA/MCM2/E2F2/MCM7/CDK2/CDC7/CCNE1/CHEK2/RBL1/E2F1/MCM5/MCM3/YWHAQ/SKP2/BUB3/CCNE2/ORC5/HDAC2/CDK4/ANAPC7/YWHAZ/HDAC1/YWHAG/PRKDC/TFDP1/MAD2L2/ANAPC1/E2F3/CDC27/ANAPC5/RAD21/SFN/ORC2/ATR/E2F4/SMC1A/ANAPC11/CDKN2C/SMC3/ORC3/CDKN2A/CDC23/CDC25B/CUL1/YWHAE/CDK6/FZR1/MYC…
Spliceosome	Spliceosome	Spliceosome	127	0.785221885378416	2.81282448987082	8.40600494531576e-31	8.40600494531576e-31	4.07027607878447e-29	5495	tags=68%, list=10%, signal=61%	ALYREF/SNRPD1/SNRPA1/EIF4A3/EFTUD2/PRPF19/SNRPF/SNRPG/HNRNPC/USP39/SRSF9/SNRPB/PRPF4/SF3B6/PPIL1/THOC3/LSM5/MAGOHB/TRA2B/SNRPA/NCBP2/SNRPE/SNRPD2/NCBP1/U2SURP/SNRNP40/SNRPC/LSM4/U2AF2/PRPF40A/PHF5A/HNRNPK/WBP11/LSM2/SF3B3/SRSF1/SRSF3/SMNDC1/MAGOH/PPIH/LSM7/SRSF2/PUF60/RBMX/SF3B4/BUD31/HNRNPM/HNRNPA1/TCERG1/SNRNP200/ISY1/SRSF7/HSPA1B/SNW1/SF3A3/DDX23/CDC5L/HNRNPA3/BCAS2/SNRPB2/DHX8/CRNKL1/SF3A2/DH…
DNA replication	DNA replication	DNA replication	36	0.904370638646147	2.6825393732812	3.02090538233351e-18	3.02090538233351e-18	9.75169456753275e-17	2610	tags=81%, list=5%, signal=77%	FEN1/MCM6/MCM4/RFC4/PCNA/MCM2/RFC5/MCM7/RFC2/POLE2/RFC3/DNA2/PRIM2/PRIM1/MCM5/MCM3/POLD2/LIG1/POLE3/POLE/POLA2/SSBP1/POLD1/RPA3/POLA1/RPA1/RNASEH2A/POLD3/POLE4
Proteasome	Proteasome	Proteasome	46	0.84523934436604	2.6146673044631	3.18993653894761e-16	3.18993653894761e-16	7.72300425218894e-15	2806	tags=67%, list=5%, signal=64%	PSMD14/PSMD2/PSMD11/PSME4/PSMD12/PSME3/PSMD3/PSMC2/PSMA4/PSMC4/SEM1/PSMD1/PSMD7/PSMA7/PSMB4/PSMB5/PSMB3/PSMB7/PSMB2/PSMC3/PSMC1/PSMD4/PSMB1/PSMC5/PSMC6/PSMA5/PSMD8/PSMB6/PSMA3/POMP/PSMD13
Pyrimidine metabolism	Pyrimidine metabolism	Pyrimidine metabolism	97	0.694945959945043	2.42327521208421	8.55977462023667e-14	8.55977462023667e-14	1.65789318960373e-12	5309	tags=58%, list=9%, signal=52%	RRM2/TK1/POLE2/PRIM2/TYMS/DTYMK/RRM1/PRIM1/PNPT1/POLR2H/CTPS1/POLD2/UMPS/CAD/UCK2/POLE3/NME1/POLE/POLR2D/POLA2/POLD1/POLA1/POLR1B/DUT/POLR2G/POLR3G/POLR1C/POLR1A/POLD3/POLR2J/DCK/POLR2F/POLR3F/POLR3K/POLR2B/NUDT2/POLE4/POLR3D/TXNRD1/POLR1E/NT5C3A/POLR1H/NT5M/NME2/POLR3B/POLR3A/ITPA/POLR2K/POLR3C/NME4/NT5C/PNP/CANT1/POLR1D/NT5C1B/UCKL1
Cytokine-cytokine receptor interaction	Cytokine-cytokine receptor interaction	Cytokine-cytokine receptor interaction	262	-0.519415	-2.10269	1.20242717412559e-13	1.20242717412559e-13	1.94075964946586e-12	9230	tags=44%, list=16%, signal=37%	FLT3LG/TNF/CXCL5/CXCR3/PDGFC/VEGFC/CRLF2/IL18RAP/CCL22/GDF5/LTB/CCL18/CCL24/IL13RA1/IL17RB/IL5/IFNA5/CCL15/EDA/IL18/TNFSF13B/CCR5/CCR9/IL18R1/IL17RA/XCR1/BMPR1A/TNFRSF13B/PDGFRA/CCR7/IFNGR1/IL2RG/IL12RB1/CX3CL1/CCL21/KITLG/IL13/CCL2/IL7/FAS/PDGFA/CSF2/IL12B/IL4/CCL13/FLT1/TNFSF8/VEGFB/PDGFRB/IFNAR2/CCR6/CCR4/FLT3/PDGFB/AMHR2/IL4R/IL10RB/CXCR1/CSF1R/CXCL3/TGFB2/CCR1/CSF3/IL2/TNFRSF10D/CXCR2/CSF2RB…
Complement and coagulation cascades	Complement and coagulation cascades	Complement and coagulation cascades	69	-0.724722	-2.44558	1.63031432965956e-12	1.63031432965956e-12	2.25547245607037e-11	7245	tags=59%, list=13%, signal=52%	C4BPB/CD46/F3/CFH/THBD/C1QC/FGG/F13A1/KLKB1/C1QB/C3AR1/CR1/SERPINF2/C1QA/SERPIND1/MASP2/C5AR1/C5/TFPI/MASP1/PROS1/C4B/SERPING1/C4A/SERPINA1/CD59/C3/CFI/C6/C8B/C2/CFD/F10/CD55/VWF/CPB2/C4BPA/F8/C7/F11/A2M
Mismatch repair	Mismatch repair	Mismatch repair	23	0.909501294077119	2.41697554373626	3.5420709676415e-12	3.5420709676415e-12	4.28777011872392e-11	1818	tags=70%, list=3%, signal=67%	EXO1/RFC4/PCNA/RFC5/RFC2/RFC3/MSH6/MSH2/POLD2/LIG1/SSBP1/POLD1/RPA3/RPA1/POLD3/PMS2
Hematopoietic cell lineage	Hematopoietic cell lineage	Hematopoietic cell lineage	84	-0.680203	-2.36459	5.33050756722704e-12	5.33050756722704e-12	5.73575083257179e-11	8122	tags=64%, list=14%, signal=55%	CD2/FCER2/IL5/CD3E/CD38/CD14/GP1BA/MME/ITGB3/CD1A/ITGA4/KITLG/IL7/GP5/FCGR1A/CSF2/IL4/CD1D/CD5/FLT3/IL4R/CSF1R/ANPEP/CSF3/CD1B/CR1/ITGA3/CD22/CSF2RA/CSF1/KIT/IL7R/ITGAM/CD4/EPOR/IL11RA/HLA-DRA/CD1E/CSF3R/CD37/IL1R1/CD59/ITGA1/IL5RA/HLA-DRB5/CD36/HLA-DRB1/CD33/CD1C/GP9/IL3RA/IL6R/CD55/CD34
Cell adhesion molecules (CAMs)	Cell adhesion molecules (CAMs)	Cell adhesion molecules (CAMs)	130	-0.59951	-2.22547	2.07755641558641e-11	2.07755641558641e-11	2.01194937088368e-10	8565	tags=55%, list=15%, signal=47%	HLA-G/CLDN7/CD2/CD80/CNTNAP1/HLA-DOB/ICOS/CD6/CLDN9/HLA-A/SDC2/SELL/NFASC/CD226/SDC3/ALCAM/ICAM3/SELE/ITGA4/NECTIN3/CD86/HLA-B/HLA-F/MAG/HLA-DQA2/HLA-C/CDH15/CLDN3/JAM3/CADM3/PTPRC/CLDN2/CD22/ITGB2/NCAM2/ITGAM/SIGLEC1/HLA-DQA1/HLA-DMB/ITGAL/CD4/SDC4/HLA-DRA/CD40LG/HLA-DQB1/CLDN23/HLA-DPA1/ICAM1/HLA-DOA/SELPLG/HLA-DRB5/HLA-DRB1/OCLN/HLA-DPB1/HLA-E/CADM1/CLDN5/HLA-DMA/NEGR1/ICAM2/SELP/SPN/CD34/PTPR…
RNA degradation	RNA degradation	RNA degradation	59	0.746931872356553	2.40284109306618	2.75894669500428e-11	2.75894669500428e-11	2.42892914775496e-10	7275	tags=69%, list=13%, signal=61%	HSPD1/PNPT1/EXOSC2/CNOT9/LSM5/ENO1/LSM4/EXOSC5/EXOSC3/LSM2/PATL1/LSM7/MPHOSPH6/EDC3/EXOSC4/HSPA9/PAPOLG/EXOSC9/LSM1/PAPOLA/CNOT3/EXOSC8/XRN2/EXOSC1/TENT4A/C1D/ZCCHC7/ENO2/LSM3/XRN1/WDR61/SKIV2L/LSM6/CNOT2/LSM8/EXOSC7/CNOT10/DCPS/EXOSC10/CNOT1/DIS3
Huntington's disease	Huntington's disease	Huntington's disease	182	0.558646734678478	2.10020564994479	3.75549138697449e-11	3.75549138697449e-11	3.03074743510222e-10	8761	tags=53%, list=15%, signal=45%	POLR2H/HDAC2/HDAC1/POLR2D/CYCS/ATP5F1B/VDAC1/CYC1/ATP5MC3/VDAC2/UQCRH/AP2S1/CASP3/AP2M1/ATP5MC1/NDUFB4/POLR2G/COX5A/NDUFB5/NDUFS6/VDAC3/TBPL1/UQCRC1/SLC25A5/POLR2J/TFAM/HAP1/COX7A2L/NDUFAB1/COX5B/UQCRFS1/POLR2F/COX6B1/TAF4B/TBP/NDUFA8/PPID/ATP5PD/NDUFB3/NDUFA9/POLR2B/COX8A/NDUFB9/COX7B/SDHB/UQCRHL/SDHC/COX6A1/NDUFA6/COX7A2/ATP5F1C/NDUFS3/CLTCL1/DCTN2/SOD1/NDUFS2/COX6C/NDUFA4L2/AP2A1/POLR2K/NDUFS1…
Aminoacyl-tRNA biosynthesis	Aminoacyl-tRNA biosynthesis	Aminoacyl-tRNA biosynthesis	41	0.79092528454198	2.39057405004819	1.03910179973404e-10	1.03910179973404e-10	7.74067737453698e-10	6975	tags=71%, list=12%, signal=62%	FARSB/TARS1/MARS1/YARS2/DARS2/DARS1/IARS1/GARS1/FARSA/MARS2/KARS1/RARS1/YARS1/IARS2/EPRS1/CARS1/PARS2/NARS1/VARS1/TARS2/AARS1/SARS2/MTFMT/AARS2/RARS2/LARS2/EARS2/NARS2/LARS1
Ubiquitin mediated proteolysis	Ubiquitin mediated proteolysis	Ubiquitin mediated proteolysis	135	0.587377599210873	2.12696417774578	1.61233787698689e-10	1.61233787698689e-10	1.11530138859243e-09	9174	tags=51%, list=16%, signal=43%	CDC20/UBE2C/UBE2S/BRCA1/SKP2/PRPF19/SAE1/ANAPC7/UBA2/RNF7/ANAPC1/CDC27/UBA6/UBE2O/ANAPC5/UBE2N/UBE2Z/UBE2E3/FANCL/CBLC/UBE2M/UBE2L3/CUL2/UBE2G1/ELOC/ANAPC11/UBE3C/TRIM37/CUL4B/KLHL13/UBE2A/COP1/KEAP1/CDC23/CDC34/CUL1/FZR1/UBE2R2/UBE2K/ITCH/DDB1/PIAS4/UBR5/PIAS2/TRIM32/UBE2J2/NHLRC1/DDB2/CDC26/UBE2D2/UBE3A/PIAS3/UBE4B/UBE2F/UBA1/CBLB/UBE2Q1/RBX1/PPIL2/MID1/BIRC6/HUWE1/ANAPC13/UBE2H/UBE2E1/HERC3/UB…
Homologous recombination	Homologous recombination	Homologous recombination	28	0.85241197519447	2.38179494667546	6.29124255574221e-10	6.29124255574221e-10	3.96773765013412e-09	6556	tags=86%, list=12%, signal=76%	RAD51/RAD54L/BLM/XRCC2/EME1/RAD54B/POLD2/BRCA2/RAD51C/SEM1/SSBP1/POLD1/RPA3/RPA1/XRCC3/POLD3/RAD51D/TOP3A/MRE11/NBN/RAD52/MUS81/RAD51B/TOP3B
Autoimmune thyroid disease	Autoimmune thyroid disease	Autoimmune thyroid disease	50	-0.736019	-2.34621	6.55539263935203e-10	6.55539263935203e-10	3.96773765013412e-09	8853	tags=58%, list=16%, signal=49%	CD28/HLA-G/CD80/IL5/HLA-DOB/IFNA5/HLA-A/PRF1/FAS/IL4/CD86/HLA-B/HLA-F/HLA-DQA2/HLA-C/IL2/TSHB/HLA-DQA1/HLA-DMB/HLA-DRA/CD40LG/HLA-DQB1/HLA-DPA1/HLA-DOA/HLA-DRB5/HLA-DRB1/HLA-DPB1/HLA-E/HLA-DMA
Vascular smooth muscle contraction	Vascular smooth muscle contraction	Vascular smooth muscle contraction	115	-0.589906	-2.16705	8.96741748990558e-10	8.96741748990558e-10	5.10837404997717e-09	7650	tags=51%, list=13%, signal=45%	ADRA1D/ITPR3/GNA11/GUCY1B1/CACNA1F/CALM1/PRKCA/PRKCH/ARHGEF1/PLA2G2A/CACNA1S/ACTA2/ARAF/CYP4A22/PLA2G2C/MYLK3/CYP4A11/KCNMB1/ADCY7/ITPR2/MAPK3/MYLK/PRKCQ/ACTG2/ADRA1B/EDNRA/PRKCB/ARHGEF12/GUCY1A1/IRAG1/PLA2G12B/MYH11/ADCY6/PLA2G12A/CACNA1C/RHOA/PRKG1/PLCB2/MYL9/PLA2G5/ITPR1/ADRA1A/CALCRL/AGTR1/PLA2G10/CACNA1D/PPP1R12B/PRKCD/PTGIR/PPP1R14A/ADCY9/PRKCE/ADCY4/RAMP2/GNAQ/RAMP3/GUCY1A2/NPR1/PLA2G1B
Leukocyte transendothelial migration	Leukocyte transendothelial migration	Leukocyte transendothelial migration	115	-0.580796	-2.13358	2.70307834506431e-09	2.70307834506431e-09	1.45428776459601e-08	7082	tags=43%, list=12%, signal=38%	CYBA/PIK3R3/CLDN9/PIK3CD/PRKCA/ITGA4/ITK/SIPA1/PLCG2/VAV1/NCF1/PTK2B/PIK3R1/CLDN3/JAM3/RAPGEF4/TXK/CTNNA1/CLDN2/ITGB2/PIK3CG/CTNND1/AFDN/MYL12A/MSN/CYBB/PRKCB/NCF2/EZR/CXCL12/NCF4/ITGAM/RASSF5/ITGAL/RHOA/PIK3R5/RAP1A/GNAI2/CLDN23/MYL9/ACTN2/ICAM1/OCLN/RAPGEF3/CLDN5/PECAM1/CLDN18/CDH5/ESAM/JAM2
Nucleotide excision repair	Nucleotide excision repair	Nucleotide excision repair	44	0.756019096642044	2.30446952041439	3.21864914372092e-09	3.21864914372092e-09	1.64053031148102e-08	4629	tags=57%, list=8%, signal=52%	RFC4/PCNA/RFC5/RFC2/POLE2/RFC3/POLD2/LIG1/POLE3/POLE/GTF2H3/POLD1/RPA3/RPA1/RAD23B/MNAT1/RAD23A/POLD3/ERCC3/CUL4B/POLE4/DDB1/GTF2H1/ERCC1/ERCC2
Oocyte meiosis	Oocyte meiosis	Oocyte meiosis	113	0.593300654723015	2.09415741963988	3.73401491123242e-09	3.73401491123242e-09	1.80804932543886e-08	2849	tags=37%, list=5%, signal=35%	CCNB2/BUB1/CCNB1/CDC20/PLK1/CDK1/MAD2L1/AURKA/SGO1/CDC25C/ESPL1/PTTG1/PKMYT1/FBXO5/CDK2/CCNE1/YWHAQ/CCNE2/ANAPC7/YWHAZ/YWHAG/PPP1CC/FBXO43/MAD2L2/ANAPC1/CDC27/ANAPC5/PPP3R1/ADCY3/MAPK12/SMC1A/ANAPC11/CALML3/PPP1CB/PPP2R5D/SMC3/PRKX/PPP1CA/CDC23/PPP2R1B/CUL1/YWHAE
Allograft rejection	Allograft rejection	Allograft rejection	35	-0.786043	-2.34073	4.22251014308145e-09	4.22251014308145e-09	1.94722272262403e-08	9158	tags=83%, list=16%, signal=70%	TNF/CD28/HLA-G/CD80/IL5/HLA-DOB/HLA-A/PRF1/FAS/IL12B/IL4/CD86/HLA-B/HLA-F/HLA-DQA2/HLA-C/IL2/HLA-DQA1/HLA-DMB/HLA-DRA/CD40LG/HLA-DQB1/HLA-DPA1/HLA-DOA/HLA-DRB5/HLA-DRB1/HLA-DPB1/HLA-E/HLA-DMA
Base excision repair	Base excision repair	Base excision repair	35	0.787357928996528	2.31847795484608	4.73406155555325e-09	4.73406155555325e-09	2.08389312493253e-08	3507	tags=63%, list=6%, signal=59%	FEN1/PCNA/UNG/POLE2/NEIL3/TDG/POLD2/LIG1/POLE3/POLE/APEX2/PARP1/LIG3/POLD1/PARP2/SMUG1/APEX1/POLD3/MBD4/POLE4/POLB/HMGB1
Lysosome	Lysosome	Lysosome	121	-0.559386	-2.06069	2.17512624524187e-08	2.17512624524187e-08	9.15842629575524e-08	8461	tags=50%, list=15%, signal=43%	LAPTM4A/ATP6AP1/SLC11A2/GNPTAB/NAGLU/LAMP1/MANBA/AP1S2/ARSA/GUSB/CD68/HGSNAT/PSAP/SCARB2/ATP6V0D2/CTNS/HEXA/TCIRG1/SGSH/HEXB/LGMN/GNS/MCOLN1/GLB1/SLC17A5/LAPTM5/LIPA/MAN2B1/CLN3/CTSZ/IDUA/CTSW/AP3S2/PLA2G15/SUMF1/CTSF/ATP6V0D1/TPP1/ATP6V0A1/FUCA1/ACP5/GNPTG/SLC11A1/CD63/GGA2/CTSS/GALC/CTSE/CTSG/LAMP3/SMPD1/CLN5/CTSD/DNASE2B/SORT1/HYAL1/NPC2/CTSO/ASAH1/NAPSA/CTSH
Parkinson's disease	Parkinson's disease	Parkinson's disease	130	0.561497952392675	2.01567320172146	2.5712905320672e-08	2.5712905320672e-08	1.03753828486922e-07	9152	tags=56%, list=16%, signal=47%	CYCS/ATP5F1B/VDAC1/CYC1/ATP5MC3/VDAC2/UQCRH/CASP3/ATP5MC1/NDUFB4/COX5A/NDUFB5/NDUFS6/VDAC3/UQCRC1/SLC25A5/UCHL1/HTRA2/UBE2L3/UBE2G1/COX7A2L/NDUFAB1/COX5B/UQCRFS1/COX6B1/NDUFA8/PPID/ATP5PD/NDUFB3/NDUFA9/COX8A/NDUFB9/COX7B/SDHB/UQCRHL/SDHC/COX6A1/NDUFA6/COX7A2/ATP5F1C/NDUFS3/NDUFS2/COX6C/NDUFA4L2/NDUFS1/NDUFV1/NDUFB6/ATP5PB/VDAC2P5/ATP5MC2/NDUFS8/NDUFA10/NDUFA1/NDUFS5/UBE2J2/ATP5F1D/UBA1/COX7B2/ATP…
Neuroactive ligand-receptor interaction	Neuroactive ligand-receptor interaction	Neuroactive ligand-receptor interaction	272	-0.43954	-1.79872	4.87234199623044e-08	4.87234199623044e-08	1.88739142590821e-07	7650	tags=28%, list=13%, signal=25%	ADRA1D/GLP2R/NPY4R/ADORA1/LHCGR/SSTR4/HRH1/NPY1R/HRH4/FPR3/GRM6/P2RX4/PTGER3/ADORA3/GRIN3B/GLP1R/PTGDR/PTGER1/NMBR/ADCYAP1R1/P2RY8/PTAFR/P2RX2/NPFFR1/CHRNA10/THRB/CHRNA2/DRD1/C3AR1/FPR1/GIPR/APLNR/PTGER4/TSHB/ADRA2A/P2RX7/ADRA1B/S1PR2/EDNRA/FPR2/P2RX1/NR3C1/CHRM2/CNR1/P2RY13/PTGFR/C5AR1/TBXA2R/PTGER2/AVPR2/F2RL3/GRIK4/CTSG/GRID1/RXFP1/CHRM1/AGTR2/CYSLTR1/RXFP2/ADRA1A/CALCRL/AGTR1/THRA/LEPR/SSTR1/…
Basal transcription factors	Basal transcription factors	Basal transcription factors	35	0.763475665637343	2.24815352034058	5.35556118755725e-08	5.35556118755725e-08	1.99478392411039e-07	5842	tags=57%, list=10%, signal=51%	GTF2H3/GTF2E1/TAF2/TAF5/GTF2E2/TBPL1/TAF6/GTF2IRD1/GTF2A2/TAF4B/TBP/TAF11/GTF2F2/GTF2A1/TAF9/GTF2H1/TAF4/TAF6L/TAF5L/GTF2F1
Intestinal immune network for IgA production	Intestinal immune network for IgA production	Intestinal immune network for IgA production	45	-0.715048	-2.23855	5.87287884431455e-08	5.87287884431455e-08	2.10645167125512e-07	10589	tags=71%, list=19%, signal=58%	IL6/TGFB1/IL15/CXCR4/CD28/CD80/IL5/HLA-DOB/ICOS/TNFSF13B/CCR9/MAP3K14/TNFRSF13B/ITGA4/IL4/CD86/HLA-DQA2/IL2/CXCL12/HLA-DQA1/HLA-DMB/HLA-DRA/CD40LG/HLA-DQB1/HLA-DPA1/HLA-DOA/HLA-DRB5/HLA-DRB1/HLA-DPB1/HLA-DMA/PIGR/TNFSF13
Alzheimer's disease	Alzheimer's disease	Alzheimer's disease	166	0.512543854679164	1.90427434031687	9.24123424795991e-08	9.24123424795991e-08	3.19621635643726e-07	7806	tags=46%, list=14%, signal=40%	GAPDH/CYCS/ATP5F1B/CDK5R1/CYC1/ATP5MC3/NAE1/UQCRH/CASP3/HSD17B10/ATP5MC1/NDUFB4/PPP3R1/COX5A/NDUFB5/NDUFS6/BID/ATP2A2/UQCRC1/ADAM17/COX7A2L/NDUFAB1/COX5B/UQCRFS1/COX6B1/CALML3/CDK5/NDUFA8/ATP5PD/NDUFB3/NDUFA9/COX8A/NDUFB9/COX7B/SDHB/UQCRHL/SDHC/COX6A1/ATP2A1/NDUFA6/COX7A2/ATP5F1C/NDUFS3/APH1A/NDUFS2/COX6C/GSK3B/FADD/NDUFA4L2/NDUFS1/CAPN1/NDUFV1/CALML5/NDUFB6/ATP5PB/GRIN2D/PLCB1/ATP5MC2/NDUFS8/NDU…
Asthma	Asthma	Asthma	28	-0.790233	-2.25129	1.99675315115809e-07	1.99675315115809e-07	6.66792340858602e-07	7712	tags=75%, list=14%, signal=65%	IL5/HLA-DOB/PRG2/IL13/IL4/EPX/HLA-DQA2/FCER1G/HLA-DQA1/HLA-DMB/HLA-DRA/CD40LG/HLA-DQB1/HLA-DPA1/HLA-DOA/HLA-DRB5/HLA-DRB1/HLA-DPB1/HLA-DMA/FCER1A/MS4A2
Oxidative phosphorylation	Oxidative phosphorylation	Oxidative phosphorylation	132	0.540672734756175	1.94823883146813	2.73358641441305e-07	2.73358641441305e-07	8.82420877635088e-07	8761	tags=50%, list=15%, signal=42%	ATP5F1B/CYC1/ATP5MC3/UQCRH/ATP5MC1/NDUFB4/COX5A/NDUFB5/NDUFS6/UQCRC1/COX7A2L/NDUFAB1/COX5B/UQCRFS1/COX6B1/ATP6V1E2/NDUFA8/ATP5PD/NDUFB3/NDUFA9/COX8A/NDUFB9/COX7B/SDHB/UQCRHL/SDHC/COX6A1/COX10/NDUFA6/COX7A2/ATP5F1C/NDUFS3/ATP5MF/NDUFS2/COX6C/NDUFA4L2/NDUFS1/NDUFV1/NDUFB6/COX17/ATP5PB/ATP5MC2/NDUFS8/ATP6V1F/NDUFA10/ATP6V1A/NDUFA1/NDUFS5/ATP4A/ATP5F1D/ATP6V1C1/COX7B2/ATP6V1E1/ATP5F1A/NDUFB7/UQCRC2/A…
Graft-versus-host disease	Graft-versus-host disease	Graft-versus-host disease	37	-0.738495	-2.23587	3.22268808380926e-07	3.22268808380926e-07	1.00674806013736e-06	9158	tags=78%, list=16%, signal=66%	IL6/KIR2DL3/TNF/CD28/HLA-G/KLRD1/CD80/HLA-DOB/HLA-A/PRF1/FAS/KIR3DL1/CD86/HLA-B/HLA-F/HLA-DQA2/HLA-C/IL2/HLA-DQA1/HLA-DMB/HLA-DRA/HLA-DQB1/HLA-DPA1/HLA-DOA/HLA-DRB5/HLA-DRB1/HLA-DPB1/HLA-E/HLA-DMA
Purine metabolism	Purine metabolism	Purine metabolism	158	0.512110830210595	1.88199798922448	3.77016695094568e-07	3.77016695094568e-07	1.14097157725988e-06	5123	tags=42%, list=9%, signal=38%	RRM2/POLE2/PAICS/GMPS/PRIM2/RRM1/HPRT1/PRIM1/PPAT/PNPT1/POLR2H/POLD2/GART/POLE3/NME1/AK4/POLE/PKM/POLR2D/POLA2/DGUOK/ADA/POLD1/POLA1/PRPS2/POLR1B/POLR2G/POLR3G/ADCY3/ATIC/POLR1C/POLR1A/POLD3/POLR2J/ADSL/DCK/POLR2F/POLR3F/ADSS2/PRPS1/POLR3K/POLR2B/NUDT2/GDA/POLE4/POLR3D/POLR1E/NT5C3A/POLR1H/NT5M/PDE6D/NME2/POLR3B/POLR3A/ITPA/POLR2K/ADCY10/POLR3C/NME4/NT5C/PNP/CANT1/PRUNE1/POLR1D/PFAS/NT5C1B
Leishmania infection	Leishmania infection	Leishmania infection	70	-0.605104	-2.04195	7.14849543076384e-07	7.14849543076384e-07	2.09780408175526e-06	7693	tags=60%, list=14%, signal=52%	PTGS2/HLA-DOB/FCGR3B/CYBA/NFKB1/IFNGR1/PTPN6/ITGA4/FCGR1A/IL12B/IL4/FCGR3A/JAK2/HLA-DQA2/NCF1/TGFB2/MYD88/CR1/MAPK3/JAK1/ITGB2/FCGR2A/NFKBIA/PRKCB/JUN/NCF2/NCF4/ITGAM/HLA-DQA1/HLA-DMB/TLR4/HLA-DRA/HLA-DQB1/FOS/HLA-DPA1/HLA-DOA/HLA-DRB5/C3/HLA-DRB1/TLR2/HLA-DPB1/HLA-DMA
Ribosome	Ribosome	Ribosome	88	0.58143397947672	1.99842281687191	7.6584684521308e-07	7.6584684521308e-07	2.18135943528184e-06	10289	tags=51%, list=18%, signal=42%	MRPL13/RPL22L1/RPLP0/RPS7/RPL35A/RPL26L1/RPS27A/RPS19/RPL17/RPS2/RPL38/RPL6/RPS17/RPL35/RPL3L/RPS5/RPL37/RPS10/UBA52/RPL4/RPL36/RPS15/RPL8/RSL24D1/RPLP1/RPL24/RPL18/RPL18A/RPL41/RPS21/RPL39/RPL7/RPL27/RPSA/RPS3/RPL19/RPS18/RPS26/RPL36A/RPS16/RPL7A/RPL10L/RPS8/RPL28/RPL12
Calcium signaling pathway	Calcium signaling pathway	Calcium signaling pathway	178	-0.462728	-1.80221	8.04951892105299e-07	8.04951892105299e-07	2.22723531048684e-06	8523	tags=44%, list=15%, signal=37%	PHKG1/PPP3CB/TNNC2/ADRB3/CAMK2G/PPP3R2/ADRA1D/ITPR3/LHCGR/HRH1/GNA11/CD38/CACNA1F/P2RX4/CALM1/PDGFRA/PTGER3/PRKCA/ATP2A3/NOS3/ERBB2/PLCD1/PTGER1/CACNA1S/PLCG2/PTAFR/PDGFRB/RYR2/P2RX2/CACNA1H/MYLK3/PTK2B/PDE1A/PHKB/CAMK2D/ATP2B4/SLC8A1/DRD1/CAMK2A/PPP3CC/ADCY7/BST1/ITPR2/PPP3CA/MYLK/ERBB3/P2RX7/SLC8A3/ADRA1B/PLN/CHP1/EDNRA/PRKCB/SLC25A4/P2RX1/CHRM2/PDE1C/PTGFR/TBXA2R/PLCE1/CACNA1C/PLCB2/CHRM1/CYSL…
Jak-STAT signaling pathway	Jak-STAT signaling pathway	Jak-STAT signaling pathway	155	-0.478968	-1.82957	1.00327721913695e-06	1.00327721913695e-06	2.6988743906608e-06	8582	tags=39%, list=15%, signal=33%	CRLF2/CCND2/SPRED2/IL13RA1/IL5/IFNA5/PIK3R3/CCND1/PIK3CD/SOCS3/IFNGR1/IL2RG/IL12RB1/PIAS1/STAT4/PTPN6/IL13/IL7/CSF2/IL12B/IL4/IFNAR2/STAM2/JAK2/IL4R/SOS2/PIK3R1/IL10RB/SOCS2/STAT3/CSF3/IL2/CSF2RB/IL10RA/IFNAR1/STAT5B/STAT6/CSF2RA/MPL/SPRY2/JAK1/PIK3CG/IL7R/SPRED1/STAT5A/CTF1/PIK3R5/EPOR/IL11RA/SPRY1/CSF3R/CCND3/IL5RA/LEPR/LIFR/IL3RA/SPRY4/IL6R/CISH/IL6ST
Viral myocarditis	Viral myocarditis	Viral myocarditis	68	-0.608832	-2.05203	1.93960238731211e-06	1.93960238731211e-06	5.07662644758788e-06	8853	tags=62%, list=16%, signal=52%	CD28/HLA-G/SGCB/CD80/HLA-DOB/RAC2/CCND1/HLA-A/MYH14/PRF1/MYH1/CD86/HLA-B/HLA-F/HLA-DQA2/HLA-C/FYN/DMD/ITGB2/SGCG/SGCD/HLA-DQA1/MYH2/HLA-DMB/ITGAL/MYH11/MYH10/LAMA2/HLA-DRA/CD40LG/HLA-DQB1/CAV1/HLA-DPA1/ICAM1/HLA-DOA/HLA-DRB5/HLA-DRB1/HLA-DPB1/HLA-E/HLA-DMA/CD55/SGCA
Chemokine signaling pathway	Chemokine signaling pathway	Chemokine signaling pathway	187	-0.44814	-1.75485	2.05099524684459e-06	2.05099524684459e-06	5.22691309445159e-06	8149	tags=41%, list=14%, signal=35%	CCL22/CCL18/PXN/CCL24/FOXO3/RAC2/CCL15/CCR5/HCK/CRK/CCR9/PIK3R3/PIK3CD/XCR1/NFKB1/CCR7/GRK3/ITK/CX3CL1/CCL21/CCL2/CCL13/VAV1/CCR6/CCR4/JAK2/SOS2/NCF1/PTK2B/PIK3R1/CXCR1/CXCL3/STAT3/CCR1/CXCR2/ADCY7/CCL16/MAPK3/SHC2/STAT5B/CCR2/PIK3CG/CCL17/WAS/NFKBIA/PRKCB/ELMO1/PREX1/PF4/CXCL12/PPBP/GNGT2/DOCK2/ADCY6/GNG2/RHOA/PIK3R5/RAP1A/ARRB2/GNAI2/PLCB2/FGR/RASGRP2/CXCL2/CCL14/GRK5/PRKCZ/PRKCD/GNG11/CCL23/AD…
p53 signaling pathway	p53 signaling pathway	p53 signaling pathway	68	0.61479385567815	2.03473152787256	2.38769592967819e-06	2.38769592967819e-06	5.92896155277716e-06	6406	tags=44%, list=11%, signal=39%	RRM2/CCNB2/CCNB1/CDK1/GTSE1/CHEK1/CDK2/CCNE1/CHEK2/CCNE2/CDK4/CYCS/PMAIP1/PERP/SERPINB5/CASP3/BID/SFN/ATR/COP1/CDKN2A/IGFBP3/EI24/CDK6/TP73/BAX/TP53AIP1/DDB2/PIDD1/GADD45A
Focal adhesion	Focal adhesion	Focal adhesion	199	-0.43901	-1.72362	3.58681915815917e-06	3.58681915815917e-06	8.68387796185903e-06	8035	tags=41%, list=14%, signal=35%	PXN/DIAPH1/FN1/TNN/PIP5K1C/RAC2/RAPGEF1/PAK3/FLNA/ZYX/CRK/PIK3R3/CCND1/PIK3CD/PDGFRA/PRKCA/VTN/ITGB3/ITGA4/BIRC3/ERBB2/THBS1/PDGFA/MAPK9/FLT1/PDGFD/VEGFB/CHAD/VAV1/PDGFRB/PDGFB/SOS2/MYLK3/DOCK1/PIK3R1/FYN/ITGA7/PTEN/ITGA3/MAPK3/SHC2/LAMA4/MYLK/CAV2/TLN1/PIK3CG/MYL12A/PRKCB/JUN/PDPK1/LAMC3/CAPN2/ITGB6/PARVG/ILK/RHOA/TNR/PIK3R5/RAP1A/LAMA2/HGF/CAV1/MYL9/ACTN2/PARVA/KDR/ITGA1/CCND3/ITGA10/FLT4/CAV3/…
RNA polymerase	RNA polymerase	RNA polymerase	29	0.759620964387657	2.14586625365994	4.17034335982925e-06	4.17034335982925e-06	9.85036172283159e-06	7489	tags=79%, list=13%, signal=69%	POLR2H/POLR2D/POLR1B/POLR2G/POLR3G/POLR1C/POLR1A/POLR2J/POLR2F/POLR3F/POLR3K/POLR2B/POLR3D/POLR1E/POLR1H/POLR3B/POLR3A/POLR2K/POLR3C/POLR1D/POLR2I/POLR2J3/POLR2E
PPAR signaling pathway	PPAR signaling pathway	PPAR signaling pathway	69	-0.573415	-1.93499	1.14292681984481e-05	1.14292681984481e-05	2.63531998560708e-05	5445	tags=39%, list=10%, signal=35%	CPT2/ACOX3/ACSL4/CYP4A22/PPARG/GK/CYP4A11/CYP7A1/HMGCS2/ACSL1/FABP3/PDPK1/ILK/AQP7/SCP2/CD36/ACAA1/FABP4/SLC27A1/ACSL5/OLR1/ACOX2/RXRG/CYP27A1/ACADL/SORBS1/LPL
Dilated cardiomyopathy	Dilated cardiomyopathy	Dilated cardiomyopathy	90	-0.536556	-1.90227	1.3515127551909e-05	1.3515127551909e-05	3.04379861634181e-05	6797	tags=40%, list=12%, signal=35%	CACNA1F/CACNA2D4/ITGB3/ITGA4/CACNA1S/RYR2/CACNG4/DMD/SLC8A1/ITGA7/TGFB2/ADCY7/ITGA3/CACNG6/CACNB1/PLN/CACNB4/SGCG/SGCD/ITGB6/ADCY6/CACNA1C/LAMA2/MYL3/ITGA1/CACNA1D/ITGA10/ADRB1/ADCY9/ADCY4/ITGA9/DES/SGCA/TNNC1/ITGA8/CACNA2D2
Type I diabetes mellitus	Type I diabetes mellitus	Type I diabetes mellitus	41	-0.667472	-2.06895	1.58045074123201e-05	1.58045074123201e-05	3.47850402376424e-05	9158	tags=68%, list=16%, signal=57%	TNF/CD28/HLA-G/CD80/HLA-DOB/HLA-A/PRF1/FAS/IL12B/CD86/HLA-B/HLA-F/HLA-DQA2/HLA-C/ICA1/IL2/HLA-DQA1/HLA-DMB/PTPRN2/HLA-DRA/HLA-DQB1/HLA-DPA1/HLA-DOA/HLA-DRB5/HLA-DRB1/HLA-DPB1/HLA-E/HLA-DMA
Progesterone-mediated oocyte maturation	Progesterone-mediated oocyte maturation	Progesterone-mediated oocyte maturation	85	0.555813199908087	1.90241652611177	1.62258685445229e-05	1.62258685445229e-05	3.49188282127743e-05	3532	tags=34%, list=6%, signal=32%	CCNB2/CCNA2/BUB1/CCNB1/PLK1/CDK1/MAD2L1/CDC25A/CDC25C/PKMYT1/CDK2/ANAPC7/MAD2L2/ANAPC1/CDC27/ANAPC5/HSP90AA1/HSP90AB1/ADCY3/GNAI3/MAPK12/ANAPC11/PRKX/CDC23/CDC25B/PIK3CA/FZR1/MAP2K1/KRAS
MAPK signaling pathway	MAPK signaling pathway	MAPK signaling pathway	267	-0.387008	-1.57904	4.83804088840132e-05	4.83804088840132e-05	0.000101853492387396	7212	tags=32%, list=13%, signal=28%	RASA1/RASGRF2/FLNA/CRK/CD14/MAP3K14/CACNA1F/NFKB1/CACNA2D4/PDGFRA/PRKCA/RASGRP1/HSPA1L/PLA2G2A/FAS/FGF2/PDGFA/MAP2K3/MAPK9/MAP3K6/CACNA1S/PDGFRB/FGF9/PLA2G2C/CACNG4/PDGFB/DUSP16/CACNA1H/SOS2/RPS6KA3/TGFB2/PPP3CC/RASGRP3/GADD45G/CACNG6/MAPK3/PPP3CA/PTPN5/MAPKAPK3/DUSP3/CACNB1/TAOK2/CHP1/PRKCB/JUN/DUSP6/FGF7/CACNB4/FGF18/MAP3K8/PLA2G12B/TAOK3/NFATC2/FGF14/MECOM/FGF10/MRAS/FGFR4/PLA2G12A/CACNA1C/RAP…
Citrate cycle (TCA cycle)	Citrate cycle (TCA cycle)	Citrate cycle (TCA cycle)	31	0.691770913422733	1.97653195184743	0.000118483481555858	0.000118483481555858	0.000244131697718677	9219	tags=71%, list=16%, signal=60%	MDH1/MDH2/CS/FH/IDH2/DLD/ACLY/PDHA1/SDHB/IDH3A/SDHC/IDH3B/SUCLG1/OGDHL/DLAT/PC/IDH1/SDHD/ACO2/SDHA/IDH3G/SUCLA2
Hypertrophic cardiomyopathy (HCM)	Hypertrophic cardiomyopathy (HCM)	Hypertrophic cardiomyopathy (HCM)	83	-0.51811	-1.80924	0.000125062795272605	0.000125062795272605	0.0002523196746728	6797	tags=40%, list=12%, signal=35%	CACNA1F/CACNA2D4/PRKAG2/ITGB3/ITGA4/CACNA1S/RYR2/CACNG4/DMD/SLC8A1/ITGA7/TGFB2/ITGA3/CACNG6/CACNB1/CACNB4/SGCG/SGCD/ITGB6/PRKAB1/CACNA1C/LAMA2/MYL3/ITGA1/CACNA1D/ITGA10/ACE/ITGA9/DES/SGCA/TNNC1/ITGA8/CACNA2D2
Fc epsilon RI signaling pathway	Fc epsilon RI signaling pathway	Fc epsilon RI signaling pathway	79	-0.508894	-1.75841	0.000138189047760207	0.000138189047760207	0.000273112618559378	7712	tags=46%, list=14%, signal=39%	IL5/RAC2/PIK3R3/PIK3CD/PRKCA/IL13/PLA2G2A/CSF2/MAP2K3/MAPK9/IL4/PLCG2/VAV1/LCP2/PLA2G2C/SOS2/PIK3R1/FYN/FCER1G/MAPK3/INPP5D/PIK3CG/PRKCB/PLA2G12B/PDPK1/PLA2G12A/PIK3R5/BTK/PLA2G5/GAB2/PLA2G10/PRKCD/PRKCE/FCER1A/MS4A2/PLA2G1B
Tight junction	Tight junction	Tight junction	130	-0.437647	-1.62461	0.000168986434221623	0.000168986434221623	0.000327300041018722	7017	tags=37%, list=12%, signal=32%	EPB41L1/CLDN9/TJP2/MYH14/PRKCA/EPB41L3/EPB41L2/PRKCH/MYH1/VAPA/CRB3/MAGI2/CLDN3/JAM3/LLGL2/PTEN/MPDZ/CTNNA1/CLDN2/PRKCQ/SPTAN1/AFDN/MYL12A/PRKCB/TJP1/PPP2CB/MYH2/TJP3/MYH11/MRAS/MYH10/RHOA/CGN/GNAI2/CLDN23/MYL9/ACTN2/PARD6B/RRAS/OCLN/PRKCZ/PRKCD/CLDN5/MAGI3/PRKCE/MAGI1/CLDN18/JAM2
Arachidonic acid metabolism	Arachidonic acid metabolism	Arachidonic acid metabolism	58	-0.565043	-1.85746	0.000172655915211078	0.000172655915211078	0.000327850241474079	8554	tags=48%, list=15%, signal=41%	CYP2C8/PTGS2/GPX1/ALOX15/GGT5/PTGS1/PLA2G2A/GGT1/GGT6/CYP4A22/PLA2G2C/CYP4A11/PTGIS/PLA2G12B/EPHX2/PLA2G12A/TBXAS1/CYP2U1/PLA2G5/PLA2G10/ALOX5/PTGDS/LTA4H/ALOX15B/GPX3/HPGDS/LTC4S/PLA2G1B
Natural killer cell mediated cytotoxicity	Natural killer cell mediated cytotoxicity	Natural killer cell mediated cytotoxicity	132	-0.433307	-1.60603	0.00047569851187047	0.00047569851187047	0.000885916256924762	10135	tags=49%, list=18%, signal=41%	KIR2DL3/MICA/TNFRSF10B/IFNA21/ZAP70/TNF/KIR2DS4/HLA-G/PPP3CB/KLRD1/PPP3R2/IFNA5/RAC2/FCGR3B/PIK3R3/PIK3CD/HLA-A/NFATC3/CD48/PRKCA/CD247/IFNGR1/PRF1/PTPN6/FAS/CSF2/KIR3DL1/NFAT5/HLA-B/FCGR3A/PLCG2/CD244/ARAF/VAV1/IFNAR2/NCR3/NFATC1/LCP2/SH2D1B/HLA-C/SOS2/PTK2B/PIK3R1/FYN/FCER1G/TNFRSF10D/PPP3CC/MAPK3/SHC2/PPP3CA/IFNAR1/ITGB2/PIK3CG/CHP1/PRKCB/HCST/TYROBP/NFATC2/ITGAL/PIK3R5/ICAM1/TNFRSF10C/HLA-E/I…
Aldosterone-regulated sodium reabsorption	Aldosterone-regulated sodium reabsorption	Aldosterone-regulated sodium reabsorption	42	-0.59034	-1.82755	0.000515172779200684	0.000515172779200684	0.000941328613435212	8257	tags=55%, list=14%, signal=47%	ATP1A1/ATP1B1/INSR/PIK3R3/PIK3CD/PRKCA/HSD11B1/IRS2/FXYD4/PIK3R1/SCNN1A/MAPK3/PIK3CG/PRKCB/PDPK1/NEDD4L/PIK3R5/SCNN1G/ATP1B2/SCNN1B/SLC9A3R2/NR3C2/ATP1A2
Glyoxylate and dicarboxylate metabolism	Glyoxylate and dicarboxylate metabolism	Glyoxylate and dicarboxylate metabolism	15	0.762464016715835	1.85273311474178	0.000648613450348674	0.000648613450348674	0.00116320540803271	4697	tags=53%, list=8%, signal=49%	MTHFD2/MDH1/MTHFD1L/MDH2/MTHFD1/CS/PGP/AFMID
Endocytosis	Endocytosis	Endocytosis	181	-0.388922	-1.51858	0.00106697972919426	0.00106697972919426	0.00187870114996884	7044	tags=36%, list=12%, signal=32%	CCR5/LDLR/HLA-A/SMURF2/SH3GLB1/PDGFRA/VPS37B/HSPA1L/EHD4/IL2RG/IQSEC2/RAB11FIP4/GRK3/RAB31/SH3GL2/CHMP3/FLT1/PSD4/HLA-B/HLA-F/RAB11FIP3/STAM2/RAB5A/HLA-C/DNM2/ARAP2/CXCR1/CSF1R/RAB5B/CXCR2/SMAP2/VPS36/SH3KBP1/ERBB3/EPS15/DNM3/KIT/EHD1/ARAP3/RUFY1/ASAP3/ARAP1/RAB11FIP1/AP2A2/PDCD6IP/NEDD4L/FGFR4/DAB2/ARRB2/RBSN/RAB11FIP2/EHD2/MVB12B/PARD6B/KDR/PIP5K1B/IQSEC3/GRK5/HLA-E/PRKCZ/IQSEC1/ADRB2/ADRB1/ERB…
Pentose phosphate pathway	Pentose phosphate pathway	Pentose phosphate pathway	27	0.653300394444864	1.80755759162348	0.00148281228600285	0.00148281228600285	0.00256426184797486	4281	tags=52%, list=8%, signal=48%	GPI/RPE/PGM2/PRPS2/PFKP/DERA/RPIA/ALDOC/ALDOA/PRPS1/PGD/G6PD/TALDO1/PFKM
N-Glycan biosynthesis	N-Glycan biosynthesis	N-Glycan biosynthesis	46	0.557422886395115	1.72433453971539	0.00222794978105881	0.00222794978105881	0.00378525170558469	7332	tags=43%, list=13%, signal=38%	ALG3/ALG10/RPN1/DPM1/B4GALT2/DOLPP1/GANAB/ALG6/MOGS/DDOST/RPN2/ALG8/B4GALT3/STT3A/MAN1B1/TUSC3/RFT1/ALG10B/MGAT5B/DAD1
One carbon pool by folate	One carbon pool by folate	One carbon pool by folate	17	0.712230417299056	1.77983241015258	0.00231619867276012	0.00231619867276012	0.00386733716685901	3673	tags=53%, list=6%, signal=50%	MTHFD2/TYMS/SHMT2/GART/DHFR/MTHFD1L/MTHFD1/ATIC/MTFMT
Lysine degradation	Lysine degradation	Lysine degradation	44	0.568682276803845	1.73343633714429	0.00244187526212336	0.00244187526212336	0.00400807357922122	9440	tags=57%, list=17%, signal=47%	SUV39H2/SUV39H1/PLOD2/NSD2/KMT5A/ACAT2/TMLHE/EHHADH/PLOD1/ALDH1B1/OGDHL/KMT5C/EHMT2/AASDHPPT/NSD3/EHMT1/GCDH/PLOD3/HADHA/SETDB1/SETD1A/PIPOX/ECHS1/BBOX1/DOT1L
Arrhythmogenic right ventricular cardiomyopathy (ARVC)	Arrhythmogenic right ventricular cardiomyopathy (ARVC)	Arrhythmogenic right ventricular cardiomyopathy (ARVC)	74	-0.461616	-1.57689	0.0026950561907263	0.0026950561907263	0.00434991525520736	6797	tags=41%, list=12%, signal=36%	CACNA1F/CACNA2D4/ITGB3/ITGA4/CACNA1S/RYR2/CACNG4/DMD/SLC8A1/ITGA7/ITGA3/CACNG6/CTNNA1/CACNB1/CACNB4/SGCG/SGCD/TCF7L2/ITGB6/CACNA1C/LAMA2/ACTN2/ITGA1/CACNA1D/ITGA10/ITGA9/DES/SGCA/ITGA8/CACNA2D2
Cysteine and methionine metabolism	Cysteine and methionine metabolism	Cysteine and methionine metabolism	34	0.604660316594642	1.7747499880339	0.00350335833326299	0.00350335833326299	0.00556184584400682	6565	tags=47%, list=12%, signal=42%	AHCY/SMS/LDHA/DNMT3B/ENOPH1/GOT2/DNMT1/SRM/DNMT3A/GOT1/CBS/SDS/AMD1/IL4I1/LDHB/MAT1A
Glycolysis / Gluconeogenesis	Glycolysis / Gluconeogenesis	Glycolysis / Gluconeogenesis	60	0.50803662949071	1.63904008538989	0.00457101998408185	0.00457101998408185	0.00713979352352344	6574	tags=43%, list=12%, signal=38%	GAPDH/TPI1/GPI/PGAM1/PKM/PGK1/LDHA/ENO1/PGM2/PFKP/ALDH3B2/DLD/PDHA1/ALDOC/HK2/ALDOA/ADH7/ALDH1B1/DLAT/PGAM4/PFKM/ENO2/HK1/LDHB/ALDH3A1/PFKL
alpha-Linolenic acid metabolism	alpha-Linolenic acid metabolism	alpha-Linolenic acid metabolism	19	-0.671027	-1.74592	0.00479794331748457	0.00479794331748457	0.00737528463172231	5413	tags=42%, list=9%, signal=38%	PLA2G2A/ACOX3/PLA2G2C/PLA2G12B/PLA2G12A/PLA2G5/PLA2G10/PLA2G1B
Fatty acid metabolism	Fatty acid metabolism	Fatty acid metabolism	42	-0.522727	-1.61824	0.00515733147377278	0.00515733147377278	0.00776344361895893	5999	tags=43%, list=11%, signal=38%	ALDH3A2/CPT2/ACOX3/ALDH7A1/ACSL4/CYP4A22/CYP4A11/ACSL1/ACAA2/ACAT1/ACADS/ADH1A/ACADSB/ACAA1/ACSL5/ACADL/ALDH2/ADH1B
GnRH signaling pathway	GnRH signaling pathway	GnRH signaling pathway	101	-0.412317	-1.47706	0.00521078960294254	0.00521078960294254	0.00776344361895893	7554	tags=35%, list=13%, signal=30%	ITPR3/GNA11/CACNA1F/CALM1/PRKCA/HBEGF/PLA2G2A/MAP2K3/MAPK9/CACNA1S/PLA2G2C/SOS2/PTK2B/CAMK2D/CAMK2A/ADCY7/ITPR2/MAPK3/PRKCB/JUN/PLA2G12B/ADCY6/PLA2G12A/CACNA1C/PLCB2/PLA2G5/ITPR1/PLA2G10/CACNA1D/PRKCD/MAP3K3/ADCY9/ADCY4/GNAQ/PLA2G1B
Linoleic acid metabolism	Linoleic acid metabolism	Linoleic acid metabolism	29	-0.594058	-1.69534	0.00576376454139099	0.00576376454139099	0.00845719837014309	8554	tags=41%, list=15%, signal=35%	CYP2C8/CYP3A5/ALOX15/PLA2G2A/PLA2G2C/CYP1A2/PLA2G12B/CYP3A7/PLA2G12A/PLA2G5/PLA2G10/PLA2G1B
Protein export	Protein export	Protein export	24	0.636508597227017	1.70472366965426	0.00619612831418811	0.00619612831418811	0.00895591209591997	7661	tags=46%, list=13%, signal=40%	SRPRB/SEC61A1/SRP68/SEC61G/IMMP1L/SEC61A2/SRP72/SRP9/HSPA5/SRP54/SEC61B
Primary bile acid biosynthesis	Primary bile acid biosynthesis	Primary bile acid biosynthesis	16	-0.70451	-1.74232	0.00634325966791145	0.00634325966791145	0.00903374441869742	6774	tags=56%, list=12%, signal=50%	BAAT/CYP7B1/CYP7A1/CH25H/CYP39A1/SCP2/ACOX2/CYP27A1/HSD17B4
ECM-receptor interaction	ECM-receptor interaction	ECM-receptor interaction	83	-0.438998	-1.53299	0.00655303186815649	0.00655303186815649	0.00919723770969332	7802	tags=40%, list=14%, signal=34%	FN1/TNN/GP6/GP1BA/SDC2/VTN/ITGB3/HSPG2/SDC3/ITGA4/THBS1/GP5/CHAD/ITGA7/ITGA3/LAMA4/LAMC3/ITGB6/CD47/TNR/LAMA2/SDC4/ITGA1/CD36/ITGA10/GP9/VWF/LAMB2/COL6A6/COL4A4/ITGA9/TNXB/ITGA8
Antigen processing and presentation	Antigen processing and presentation	Antigen processing and presentation	81	-0.434535	-1.50046	0.00687296134083605	0.00687296134083605	0.00943824313077559	8987	tags=37%, list=16%, signal=31%	KIR2DS4/TAPBP/HLA-G/KLRD1/HLA-DOB/IFNA5/HLA-A/HSPA1L/KIR3DL1/HLA-B/HLA-F/HLA-DQA2/HLA-C/B2M/LGMN/HLA-DQA1/HLA-DMB/CD4/CIITA/CTSS/HLA-DRA/HLA-DQB1/HLA-DPA1/HLA-DOA/HLA-DRB5/HLA-DRB1/CD74/HLA-DPB1/HLA-E/HLA-DMA
Glutathione metabolism	Glutathione metabolism	Glutathione metabolism	49	0.523867718518761	1.63840631498489	0.00691966846924797	0.00691966846924797	0.00943824313077559	6194	tags=43%, list=11%, signal=38%	RRM2/RRM1/SMS/GSS/GCLC/SRM/GGCT/IDH2/GCLM/GPX2/PGD/G6PD/GSR/TXNDC12/ODC1/GSTP1/IDH1/GSTZ1/GPX7/GSTM4/GSTM3
Regulation of actin cytoskeleton	Regulation of actin cytoskeleton	Regulation of actin cytoskeleton	213	-0.340382	-1.34996	0.00743509429917889	0.00743509429917889	0.0100004192328137	8184	tags=35%, list=14%, signal=30%	IQGAP1/PXN/DIAPH1/FN1/PIP5K1C/RAC2/PAK3/CRK/CD14/PIK3R3/PIK3CD/ABI2/BAIAP2/PDGFRA/MYH14/ITGB3/ITGA4/ARHGEF1/FGF2/PDGFA/SSH2/PDGFD/TMSB4XP8/ARAF/VAV1/PDGFRB/FGF9/PDGFB/SOS2/MYLK3/DOCK1/GSN/PIK3R1/APC/ITGA7/ITGAX/ITGA3/MAPK3/CFL2/MYLK/ITGB2/PIK3CG/WAS/MYL12A/MSN/EZR/ARHGEF12/FGF7/IQGAP2/FGF18/ITGAM/TMSB4X/CHRM2/ITGB6/FGD3/NCKAP1L/ITGAL/FGF14/FGF10/MRAS/MYH10/FGFR4/RHOA/PIK3R5/MYL9/ACTN2/CHRM1/CYFIP…
Long-term depression	Long-term depression	Long-term depression	70	-0.440909	-1.48787	0.00785722217393746	0.00785722217393746	0.01042342379239	7554	tags=34%, list=13%, signal=30%	ITPR3/GNA11/GUCY1B1/PRKCA/PLA2G2A/ARAF/PLA2G2C/ITPR2/MAPK3/PRKCB/PPP2CB/GUCY1A1/PLA2G12B/PLA2G12A/PRKG1/GNAI2/PLCB2/PLA2G5/ITPR1/PLA2G10/GNAQ/GUCY1A2/GRIA1/PLA2G1B
Pathways in cancer	Pathways in cancer	Pathways in cancer	325	0.32786754945534	1.30017216728102	0.0104044010436986	0.0104044010436986	0.0136160013658644	7177	tags=28%, list=13%, signal=25%	BIRC5/RAD51/CKS1B/E2F2/CDK2/CCNE1/SLC2A1/MSH6/E2F1/MSH2/SKP2/CCNE2/BRCA2/HDAC2/CDK4/HDAC1/CYCS/TFG/DVL3/E2F3/CASP3/HSP90AA1/CBLC/BID/RAC3/EGLN3/HSP90AB1/SMO/JUP/HIF1A/FH/PLD1/CUL2/NRAS/HRAS/DVL2/ELOC/CRKL/MMP1/PGF/HSP90B1/FGF12/CDKN2A/ITGA6/FZD10/PIK3CA/CDK6/MYC/LEF1/COL4A6/TPM3/TRAF4/TGFA/GSK3B/MAP2K1/PIAS4/FADD/KRAS/FZD6/MAP2K2/LAMA1/EGLN1/MMP9/STAT1/FGF11/PIAS2/ITGAV/BAX/WNT5A/IKBKG/GLI2/AKT2/…
Non-homologous end-joining	Non-homologous end-joining	Non-homologous end-joining	13	0.701402269420263	1.63509823688646	0.0117347935703209	0.0117347935703209	0.0151522948557126	2777	tags=38%, list=5%, signal=37%	FEN1/PRKDC/XRCC6/XRCC5/MRE11
Glycosphingolipid biosynthesis - ganglio series	Glycosphingolipid biosynthesis - ganglio series	Glycosphingolipid biosynthesis - ganglio series	15	-0.685445	-1.6769	0.0133952890960408	0.0133952890960408	0.017068789429858	6164	tags=73%, list=11%, signal=65%	ST3GAL1/B3GALT4/HEXA/ST3GAL2/HEXB/GLB1/ST6GALNAC3/ST6GALNAC6/ST6GALNAC5/ST6GALNAC4/ST3GAL5
Glycosaminoglycan degradation	Glycosaminoglycan degradation	Glycosaminoglycan degradation	21	-0.593674	-1.5901	0.0147799848184232	0.0147799848184232	0.0185886343580989	9510	tags=67%, list=17%, signal=56%	ARSB/IDS/NAGLU/GUSB/HGSNAT/HEXA/SGSH/HEXB/GNS/GLB1/IDUA/HPSE2/HYAL1/HYAL2
Renin-angiotensin system	Renin-angiotensin system	Renin-angiotensin system	17	-0.640324	-1.61955	0.0175347657106133	0.0175347657106133	0.0217344972597157	8128	tags=76%, list=14%, signal=66%	AGT/MME/LNPEP/ENPEP/ACE2/ANPEP/REN/CMA1/CTSG/CPA3/AGTR2/AGTR1/ACE
Ether lipid metabolism	Ether lipid metabolism	Ether lipid metabolism	33	-0.525083	-1.53369	0.0177301523841485	0.0177301523841485	0.0217344972597157	6139	tags=39%, list=11%, signal=35%	CHPT1/PLA2G2A/PLA2G2C/PLPP1/PAFAH2/PLA2G12B/ENPP2/PLA2G12A/PLA2G5/LPCAT1/PLPP3/PLA2G10/PLA2G1B
Sulfur metabolism	Sulfur metabolism	Sulfur metabolism	13	-0.675802	-1.61097	0.0181392165516627	0.0181392165516627	0.0217542587833334	4933	tags=62%, list=9%, signal=56%	CHST11/CHST13/PAPSS1/CHST12/SUOX/SULT1A2/SULT1A1/PAPSS2
Fructose and mannose metabolism	Fructose and mannose metabolism	Fructose and mannose metabolism	34	0.554698792115569	1.62810696791516	0.0181955457975815	0.0181955457975815	0.0217542587833334	6574	tags=56%, list=12%, signal=49%	TPI1/PFKP/SORD/AKR1B10/PFKFB4/MTMR1/ALDOC/HK2/ALDOA/MTMR2/KHK/PMM2/PFKM/MPI/GMDS/HK1/AKR1B1/PFKFB1/PFKL
B cell receptor signaling pathway	B cell receptor signaling pathway	B cell receptor signaling pathway	75	-0.405817	-1.39151	0.0267521320274236	0.0267521320274236	0.0314679070051224	10508	tags=49%, list=18%, signal=40%	CR2/CD79B/LYN/IKBKB/PIK3AP1/FCGR2B/PPP3CB/PPP3R2/RAC2/PIK3R3/PIK3CD/NFKB1/NFATC3/PTPN6/NFAT5/PLCG2/VAV1/NFATC1/SOS2/PIK3R1/PPP3CC/RASGRP3/MAPK3/PPP3CA/INPP5D/CD22/PIK3CG/NFKBIA/CHP1/PRKCB/JUN/LILRB3/NFATC2/PIK3R5/BTK/FOS/CD81
Phosphatidylinositol signaling system	Phosphatidylinositol signaling system	Phosphatidylinositol signaling system	76	-0.413247	-1.4191	0.0269700485581945	0.0269700485581945	0.0314679070051224	7743	tags=45%, list=14%, signal=39%	PIP4K2B/ITPKB/CDIPT/INPPL1/PIP5K1C/ITPR3/PIK3R3/PIK3CD/ITPK1/PIK3C2A/CALM1/PRKCA/INPP5J/PLCD1/PLCG2/CDS2/PIK3R1/PIK3C2B/PTEN/DGKD/ITPR2/INPP5B/INPP5D/SYNJ1/PIK3CG/INPP5A/CDS1/PRKCB/PLCE1/PIK3R5/PLCB2/ITPR1/PIP5K1B/INPP5K
Adipocytokine signaling pathway	Adipocytokine signaling pathway	Adipocytokine signaling pathway	66	-0.421235	-1.40492	0.0280078997513983	0.0280078997513983	0.032289809237201	6742	tags=33%, list=12%, signal=29%	NFKB1/PRKAG2/TRADD/SOCS3/PPARGC1A/G6PC2/IRS2/MAPK9/ACSL4/JAK2/STAT3/PRKCQ/ACSL1/NFKBIA/TNFRSF1B/PRKAB1/ACACB/CD36/LEPR/ACSL5/RXRG/AGRP
Glycosylphosphatidylinositol(GPI)-anchor biosynthesis	Glycosylphosphatidylinositol(GPI)-anchor biosynthesis	Glycosylphosphatidylinositol(GPI)-anchor biosynthesis	24	0.571215393678589	1.52985270947954	0.0307594146438798	0.0307594146438798	0.0348219826613327	11627	tags=58%, list=20%, signal=46%	PIGX/PIGW/PIGU/PIGF/PIGC/PIGN/PIGO/PGAP1/PIGS/PIGH/PIGZ/PIGT/GPAA1/DPM2
Peroxisome	Peroxisome	Peroxisome	78	-0.395502	-1.36334	0.0309234346025096	0.0309234346025096	0.0348219826613327	7148	tags=33%, list=13%, signal=29%	GSTK1/ABCD4/PMVK/BAAT/PRDX5/PECR/FAR2/PHYH/PEX11G/ACOX3/ACSL4/NUDT12/HMGCL/DAO/ABCD3/ACSL1/MLYCD/EPHX2/DDO/SCP2/ACAA1/ACSL5/ACOX2/HSD17B4/PXMP4/CAT
Small cell lung cancer	Small cell lung cancer	Small cell lung cancer	84	0.411698803266719	1.40822061138529	0.0337299634821531	0.0337299634821531	0.037545754874266	7177	tags=33%, list=13%, signal=29%	CKS1B/E2F2/CDK2/CCNE1/E2F1/SKP2/CCNE2/CDK4/CYCS/E2F3/ITGA6/PIK3CA/CDK6/MYC/COL4A6/TRAF4/PIAS4/LAMA1/PIAS2/ITGAV/IKBKG/AKT2/ITGA2/TRAF3/PIAS3/LAMC2/PIK3CB/TRAF2
Prostate cancer	Prostate cancer	Prostate cancer	89	0.396015851169822	1.3628655323798	0.0377876207509995	0.0377876207509995	0.0411769462084201	5941	tags=27%, list=10%, signal=24%	E2F2/CDK2/CCNE1/E2F1/CCNE2/E2F3/HSP90AA1/HSP90AB1/NRAS/HRAS/HSP90B1/PIK3CA/LEF1/TGFA/GSK3B/MAP2K1/KRAS/MAP2K2/ATF4/IKBKG/AKT2/GSTP1/SOS1/MTOR
VEGF signaling pathway	VEGF signaling pathway	VEGF signaling pathway	76	-0.400631	-1.37578	0.0378425087165426	0.0378425087165426	0.0411769462084201	8505	tags=42%, list=15%, signal=36%	PPP3CB/PTGS2/PXN/PPP3R2/RAC2/PIK3R3/PIK3CD/NFATC3/PRKCA/NOS3/PLA2G2A/NFAT5/PLCG2/NFATC1/PLA2G2C/PIK3R1/PPP3CC/MAPK3/SHC2/PPP3CA/MAPKAPK3/PIK3CG/CHP1/PRKCB/PLA2G12B/NFATC2/PLA2G12A/PIK3R5/PLA2G5/KDR/PLA2G10/PLA2G1B
Pathogenic Escherichia coli infection	Pathogenic Escherichia coli infection	Pathogenic Escherichia coli infection	56	0.429738970777704	1.36633334501427	0.0405092360694402	0.0405092360694402	0.0432337429615882	5795	tags=32%, list=10%, signal=29%	TUBA1C/TUBB/YWHAQ/TUBA1B/YWHAZ/NCL/ARPC1A/ACTG1/NCK1/ARPC5L/CLDN1/TUBB4B/TUBB4A/ARPC3/TUBB2A/TUBA4A/TUBB2B/ARPC2
Other glycan degradation	Other glycan degradation	Other glycan degradation	16	-0.607381	-1.50211	0.0406256204242315	0.0406256204242315	0.0432337429615882	9812	tags=56%, list=17%, signal=47%	AGA/MAN2C1/MANBA/HEXA/HEXB/GLB1/MAN2B1/MAN2B2/FUCA1
Chronic myeloid leukemia	Chronic myeloid leukemia	Chronic myeloid leukemia	73	0.405041911522406	1.35392120994352	0.0463458110516934	0.0463458110516934	0.0487850642649404	7085	tags=34%, list=12%, signal=30%	E2F2/E2F1/HDAC2/CDK4/HDAC1/E2F3/CBLC/NRAS/HRAS/CRKL/CDKN2A/PIK3CA/CDK6/MYC/MAP2K1/KRAS/MAP2K2/IKBKG/AKT2/SMAD3/SHC1/SOS1/PTPN11/CBLB/PIK3CB
O-Glycan biosynthesis	O-Glycan biosynthesis	O-Glycan biosynthesis	30	-0.493342	-1.42864	0.0494516722878596	0.0494516722878596	0.051081410087345	6714	tags=40%, list=12%, signal=35%	GALNT11/ST6GALNAC1/ST3GAL1/GALNT15/ST3GAL2/GALNT16/GALNT18/GCNT4/GALNT12/GALNT10/GALNT17/GALNT5
ABC transporters	ABC transporters	ABC transporters	44	-0.450855	-1.41784	0.0495822817478251	0.0495822817478251	0.051081410087345	8404	tags=41%, list=15%, signal=35%	ABCC12/ABCA7/ABCD2/ABCD4/ABCG1/ABCC4/ABCC3/ABCD3/ABCG2/ABCA10/ABCB1/ABCC9/CFTR/ABCA9/ABCA6/ABCA3/ABCC6/ABCA8

## Sheet: GSEA_WDR76_KEGG_gsea
	ID	Description	setSize	enrichmentScore	NES	pvalue	p.adjust	qvalue	rank	leading_edge	core_enrichment
Cell cycle	Cell cycle	Cell cycle	125	0.807462789425376	3.05321902315808	1.84069696057631e-40	1.84069696057631e-40	1.3756787810623e-38	3694	tags=60%, list=6%, signal=56%	MCM6/ORC1/BUB1B/CHEK1/CDC7/CCNB2/MCM2/CCNE2/MCM4/BUB1/CDC20/CDC6/E2F2/PCNA/CDK1/CCNA2/PLK1/MAD2L1/CCNB1/CDK2/TTK/CDC25C/ESPL1/MCM3/RBL1/CDC25A/CDC45/MCM7/E2F1/DBF4/MCM5/BUB3/SKP2/PTTG1/PKMYT1/TFDP1/ORC6/CCNE1/PRKDC/E2F3/HDAC2/CDKN2C/CHEK2/HDAC1/CDK4/MAD2L2/SMC1A/SMC3/YWHAQ/CDC27/RAD21/ANAPC1/ORC5/ANAPC7/ANAPC5/ATR/STAG1/ORC2/CDC23/YWHAG/YWHAZ/SMC1B/CDKN2A/ORC3/WEE1/GSK3B/CDK6/ORC4/E2F4/STAG2/CDC2…
Spliceosome	Spliceosome	Spliceosome	127	0.800650290622915	3.03941707481742	9.88476276988989e-40	9.88476276988989e-40	3.69377977190622e-38	6036	tags=74%, list=11%, signal=66%	SNRNP40/SNRPA1/PRPF19/SF3A3/SNRPD1/NCBP1/ALYREF/HNRNPC/PRPF40A/EIF4A3/RBMX/MAGOH/U2SURP/HNRNPK/USP39/EFTUD2/PPIL1/TRA2B/PPIH/SRSF3/PRPF4/SNRPC/SRSF1/SRSF9/U2AF2/LSM5/LSM2/SNRPF/MAGOHB/NCBP2/SMNDC1/SNRPG/SNRPE/SNRPB/SF3B3/SNRPA/PRPF38A/WBP11/HNRNPM/DHX15/SRSF10/CDC5L/AQR/SNRNP200/LSM4/PHF5A/SRSF2/THOC3/SNRPD2/TCERG1/DDX23/PUF60/SRSF7/BCAS2/THOC1/SF3B6/HNRNPA1/RBM17/SF3B4/SF3B2/DHX8/SNW1/HNRNPU/DDX…
DNA replication	DNA replication	DNA replication	36	0.903297769949918	2.83636865810073	1.4866033101923e-21	1.4866033101923e-21	3.70346789556679e-20	1938	tags=81%, list=3%, signal=78%	MCM6/FEN1/MCM2/PRIM1/MCM4/PCNA/DNA2/MCM3/POLE2/RFC4/MCM7/RFC5/RFC2/RFC3/PRIM2/MCM5/POLA1/LIG1/POLE/POLD3/POLD1/POLA2/POLE3/POLD2/RPA3/RPA1/SSBP1/RPA2/RNASEH2A
RNA degradation	RNA degradation	RNA degradation	59	0.798592141442505	2.7252735319714	4.15463804290928e-18	4.15463804290928e-18	7.76261318543577e-17	8517	tags=78%, list=15%, signal=66%	CNOT9/EXOSC2/HSPD1/PATL1/EXOSC9/PNPT1/LSM5/EDC3/LSM2/ENO1/LSM4/EXOSC5/EXOSC10/EXOSC3/CNOT10/EXOSC8/XRN2/XRN1/CNOT3/LSM1/PAPOLG/TENT4A/HSPA9/MPHOSPH6/EXOSC4/ZCCHC7/LSM7/DCPS/LSM6/CNOT1/PAPOLA/DIS3/SKIV2L/CNOT2/WDR61/ENO2/LSM3/EXOSC1/LSM8/MTREX/CNOT7/EDC4/CNOT6/DCP2/C1D/CNOT4
Complement and coagulation cascades	Complement and coagulation cascades	Complement and coagulation cascades	69	-0.734323	-3.04083	1.29199314763704e-17	1.29199314763704e-17	1.93118975752063e-16	7138	tags=62%, list=13%, signal=55%	C8A/C1QC/CFH/FGA/C4BPB/C3AR1/F13A1/MASP2/C1QB/CD46/CR1/C1QA/FGG/MASP1/THBD/KLKB1/F3/C5/C5AR1/SERPIND1/SERPING1/C4B/SERPINF2/TFPI/C4A/PROS1/SERPINA1/C6/F8/C3/C2/CD59/C8B/VWF/F10/CFI/A2M/CFD/C7/CPB2/C4BPA/F11/CD55
Ubiquitin mediated proteolysis	Ubiquitin mediated proteolysis	Ubiquitin mediated proteolysis	135	0.629289781018197	2.41125497263316	8.08671340250416e-16	8.08671340250416e-16	8.96460455890972e-15	7567	tags=50%, list=13%, signal=44%	CDC20/UBE2C/BRCA1/SKP2/UBE2S/PRPF19/SAE1/UBA2/FANCL/CUL2/UBA6/CDC27/UBE2E3/ANAPC1/ANAPC7/ANAPC5/UBE2N/CUL4B/UBE2M/TRIM37/UBE3A/DDB1/UBE2G1/CDC23/UBE2O/UBE3C/UBE2Z/ELOC/RNF7/UBE2K/ITCH/COP1/NHLRC1/UBE4B/FBXO4/UBR5/UBE2QL1/CBLC/PIAS2/UBE2R2/UBE2L3/CUL1/HERC2/NEDD4/TRIM32/UBE2A/UBE2J2/HUWE1/PIAS4/UBE2D2/KLHL13/ANAPC11/BIRC2/KEAP1/UBE2E1/DDB2/UBE4A/CBLB/CDC34/MID1/BIRC6/CUL4A/CUL5/TRIP12/FZR1/PIAS3/U…
Proteasome	Proteasome	Proteasome	46	0.809736788803808	2.65948168047779	8.3964253967253e-16	8.3964253967253e-16	8.96460455890972e-15	5642	tags=72%, list=10%, signal=65%	PSMB2/PSMD14/PSMA4/PSMD1/PSMD2/PSME4/PSMD12/PSMC4/PSMD7/PSMA7/PSMD11/PSMC3/PSME3/PSMA5/PSMC2/PSMB4/PSMC1/PSMD3/PSMB7/PSMD4/PSMB1/PSMD8/SEM1/PSMB5/PSMC6/PSMB3/PSMC5/PSMD13/IFNG/PSMA3/PSMB6/PSME2/POMP
Cytokine-cytokine receptor interaction	Cytokine-cytokine receptor interaction	Cytokine-cytokine receptor interaction	262	-0.440774	-2.25159	4.60547932374994e-15	4.60547932374994e-15	4.14732559121397e-14	8015	tags=40%, list=14%, signal=35%	IL18/CCL2/FAS/FLT3/CSF2RB/IL5/OSMR/TGFB2/CXCL5/IL7/IL6/TNFRSF13B/IL13RA1/CCR9/IL2RG/CCR4/CCR7/CNTFR/IFNAR1/CCR1/CCL15/XCR1/IL10RA/KITLG/CCL24/INHBB/CCL22/FLT1/TNFRSF1A/IFNAR2/KIT/TNFRSF12A/CSF1R/CCR6/VEGFB/IFNGR1/EDA/CCR2/IL13/IL12B/TGFB1/IL10RB/PDGFRB/CLCF1/MPL/CCL13/TNFRSF10B/LIF/IL2/CSF2RA/IL17RA/CXCR2/PDGFA/PLEKHO2/IL4R/CXCR1/TNFRSF10D/TNFRSF19/TNFRSF1B/AMHR2/CSF1/IL4/TNFRSF14/PDGFB/CCL16/CXC…
Pyrimidine metabolism	Pyrimidine metabolism	Pyrimidine metabolism	97	0.673700147974837	2.48440260674437	4.99431462040555e-15	4.99431462040555e-15	4.14732559121397e-14	8203	tags=61%, list=14%, signal=52%	PRIM1/TYMS/RRM2/POLE2/RRM1/CTPS1/PRIM2/POLA1/TK1/DTYMK/POLE/DUT/POLD3/UCK2/POLD1/POLR2D/POLA2/POLE3/CAD/UMPS/POLD2/PNPT1/POLR2G/DCK/POLR2H/NME1/POLR1B/POLR3G/POLR3K/POLR3A/POLR3B/POLR2B/POLR3F/POLR1A/POLR3C/POLR1E/NT5C3A/NUDT2/POLR1C/POLR3D/POLR2K/NT5M/POLR1H/POLR2F/POLR2J/TXNRD1/NT5C1B/PNP/UCKL1/CANT1/POLR2I/POLR2A/UCK1/POLE4/NME7/NT5C/NME4/POLR1D/ITPA
Hematopoietic cell lineage	Hematopoietic cell lineage	Hematopoietic cell lineage	84	-0.648833	-2.767	1.81278117250174e-14	1.81278117250174e-14	1.35481540260656e-13	8041	tags=57%, list=14%, signal=49%	GP5/FLT3/CR2/IL5/FCGR1A/IL7/IL6/FCER2/KITLG/KIT/CSF1R/CD1D/ITGB3/CD1A/CR1/CSF2RA/IL4R/ANPEP/ITGAM/CSF1/IL4/CD4/CD22/IL7R/CD1B/CSF2/CSF3/HLA-DRA/IL11RA/CD37/ITGA3/CD33/HLA-DRB1/HLA-DRB5/IL5RA/EPOR/CD36/ITGA1/CD1E/CSF3R/IL3RA/CD59/GP9/IL1R1/CD1C/CD34/IL6R/CD55
Aminoacyl-tRNA biosynthesis	Aminoacyl-tRNA biosynthesis	Aminoacyl-tRNA biosynthesis	41	0.813985888872742	2.63737891725075	4.35519227125781e-14	4.35519227125781e-14	2.85035523482673e-13	6232	tags=73%, list=11%, signal=65%	TARS1/FARSB/MARS1/IARS1/DARS2/DARS1/YARS1/YARS2/PARS2/FARSA/MARS2/GARS1/EPRS1/RARS1/KARS1/CARS1/SARS2/VARS1/NARS1/TARS2/LARS1/IARS2/AARS2/AARS1/NARS2/LARS2/RARS2/MTFMT/PSTK/EARS2
Lysosome	Lysosome	Lysosome	121	-0.569287	-2.60508	4.5766267150739e-14	4.5766267150739e-14	2.85035523482673e-13	6939	tags=52%, list=12%, signal=46%	PSAP/ABCA2/MANBA/SLC11A2/NAGPA/SCARB2/HEXA/ATP6AP1/CTSA/ATP6V0C/LAPTM5/AP3S2/ATP6V0D2/TCIRG1/HGSNAT/CD68/GAA/CTSW/AGA/LIPA/MCOLN1/CTNS/GNS/GGA2/CLN3/MAN2B1/HEXB/LAPTM4A/LGMN/CTSF/CTSS/ARSA/GALC/GLB1/SORT1/CLN5/ACP5/PLA2G15/CTSZ/ATP6V0A1/ATP6V0D1/TPP1/NAGLU/FUCA1/SLC17A5/SGSH/SMPD1/SLC11A1/GNPTG/SUMF1/CTSG/CTSE/IDUA/LAMP3/DNASE2B/CTSO/HYAL1/CD63/CTSD/CTSH/ASAH1/NPC2/NAPSA
Homologous recombination	Homologous recombination	Homologous recombination	28	0.870298746943707	2.60776073071866	5.75996784787529e-14	5.75996784787529e-14	3.31139851983114e-13	3292	tags=79%, list=6%, signal=74%	RAD54L/RAD51/BLM/XRCC2/EME1/RAD54B/POLD3/POLD1/BRCA2/RAD51C/POLD2/RPA3/RPA1/TOP3A/MRE11/XRCC3/SSBP1/NBN/RPA2/SEM1/MUS81/RAD51D
Oocyte meiosis	Oocyte meiosis	Oocyte meiosis	113	0.639415806741062	2.39512573609126	7.87168405510549e-14	7.87168405510549e-14	4.20217720234955e-13	4601	tags=42%, list=8%, signal=39%	CCNB2/CCNE2/FBXO5/BUB1/CDC20/CDK1/SGO1/PLK1/MAD2L1/CCNB1/CDK2/CDC25C/ESPL1/AURKA/PTTG1/PKMYT1/CCNE1/MAD2L2/SMC1A/SMC3/PPP1CC/YWHAQ/FBXO43/CDC27/ANAPC1/PPP2R5D/ANAPC7/ANAPC5/MAP2K1/CDC23/YWHAG/YWHAZ/SMC1B/ADCY3/PPP3R1/PPP2R1B/PPP1CA/CALML5/CALML3/YWHAE/CUL1/CALM3/MAPK12/PPP1CB/PPP2R1A/PRKX/CAMK2B/ANAPC11
Vascular smooth muscle contraction	Vascular smooth muscle contraction	Vascular smooth muscle contraction	115	-0.558683	-2.53707	5.24584713113194e-13	5.24584713113194e-13	2.61372032498504e-12	5660	tags=49%, list=10%, signal=44%	ITPR2/CYP4A22/NPR2/KCNMB1/ACTA2/MYLK3/GNA11/PRKCB/PRKCH/PRKCA/CACNA1S/MYLK/ARAF/CACNA1F/CYP4A11/CALM1/ARHGEF1/PLA2G2A/ADCY6/ARHGEF12/ADCY7/MAPK3/ACTG2/ADRA1B/EDNRA/RHOA/GUCY1A1/PLA2G12A/PLA2G2C/IRAG1/CACNA1C/PRKG1/PLA2G12B/ITPR1/ADRA1A/PLA2G5/AGTR1/CALCRL/PPP1R12B/PLCB2/PTGIR/CACNA1D/MYL9/MYH11/PRKCE/PPP1R14A/GNAQ/ADCY9/GUCY1A2/ADCY4/RAMP2/RAMP3/PLA2G10/PRKCD/NPR1/PLA2G1B
Mismatch repair	Mismatch repair	Mismatch repair	23	0.88386736807724	2.5193291206834	3.01494673585967e-12	3.01494673585967e-12	1.40829748846077e-11	1772	tags=74%, list=3%, signal=72%	EXO1/PCNA/MSH2/RFC4/RFC5/RFC2/RFC3/MSH6/LIG1/POLD3/POLD1/POLD2/RPA3/RPA1/PMS2/SSBP1/RPA2
Nucleotide excision repair	Nucleotide excision repair	Nucleotide excision repair	44	0.76788686443469	2.50666393489017	3.87644202458729e-12	3.87644202458729e-12	1.70419432659875e-11	7009	tags=66%, list=12%, signal=58%	PCNA/POLE2/RFC4/RFC5/RFC2/RFC3/LIG1/POLE/POLD3/POLD1/GTF2H3/POLE3/POLD2/RPA3/RPA1/CUL4B/RAD23B/DDB1/ERCC3/MNAT1/RPA2/RAD23A/GTF2H1/RFC1/ERCC2/DDB2/CUL4A/ERCC1/POLE4
Cell adhesion molecules (CAMs)	Cell adhesion molecules (CAMs)	Cell adhesion molecules (CAMs)	130	-0.529553	-2.45046	8.42858321793081e-12	8.42858321793081e-12	3.49958718405314e-11	7268	tags=45%, list=13%, signal=40%	HLA-B/SELE/NRXN3/PTPRC/HLA-F/CLDN7/JAM3/HLA-C/HLA-DQA2/NECTIN3/CADM3/CLDN4/NECTIN2/CLDN9/MAG/SDC2/CLDN3/NCAM2/ITGB2/ITGAM/HLA-DQA1/ITGAL/CD4/CD22/ALCAM/HLA-DMB/SIGLEC1/HLA-DOA/HLA-DRA/CD40LG/HLA-DPA1/CLDN2/ICAM1/CDH15/HLA-DQB1/SDC4/HLA-DRB1/SELPLG/HLA-DPB1/HLA-DRB5/ICAM2/CADM1/HLA-E/CLDN23/OCLN/SPN/HLA-DMA/NEGR1/SELP/PECAM1/CLDN5/PTPRM/ITGA9/CDH5/CLDN18/CD34/JAM2/ITGA8/ESAM
Huntington's disease	Huntington's disease	Huntington's disease	182	0.52660359220634	2.09845599712165	9.32232187789604e-11	9.32232187789604e-11	3.66695209601451e-10	9758	tags=51%, list=17%, signal=42%	HDAC2/POLR2D/HDAC1/UQCRH/POLR2G/TFAM/ATP5F1B/POLR2H/CASP3/CYCS/TBP/VDAC3/CYC1/NDUFS6/COX5A/VDAC1/AP2S1/VDAC2/SIN3A/NDUFS1/AP2M1/TBPL1/POLR2B/NDUFB4/UQCRHL/ATP5MC3/ATP5MC1/PPID/TAF4B/UQCRC1/SDHB/NDUFB5/SLC25A5/NDUFAB1/UQCRFS1/NDUFB3/AP2A1/NDUFA9/ATP5PB/ATP5F1C/NRF1/COX6B1/COX8A/TAF4/POLR2K/NDUFS3/SDHC/COX7A2L/SP1/NDUFS5/NDUFS2/NDUFV1/COX7A2/SOD1/PLCB1/NDUFB6/NDUFA4L2/NDUFA8/ATP5PD/POLR2F/POLR2J/ND…
Base excision repair	Base excision repair	Base excision repair	35	0.77274333034764	2.40703775958415	4.55899444890906e-10	4.55899444890906e-10	1.70362424143444e-09	3241	tags=63%, list=6%, signal=59%	FEN1/PCNA/POLE2/UNG/LIG1/POLE/NEIL3/POLD3/TDG/POLD1/PARP1/POLE3/POLD2/PARP2/APEX2/MBD4/APEX1/LIG3/MUTYH/SMUG1/POLB/HMGB1
Arachidonic acid metabolism	Arachidonic acid metabolism	Arachidonic acid metabolism	58	-0.625199	-2.49477	1.00207574750512e-09	1.00207574750512e-09	3.56628461518114e-09	5569	tags=41%, list=10%, signal=37%	CYP4A22/GGT5/CYP4A11/GPX1/PLA2G2A/GGT6/GGT1/PTGIS/EPHX2/PLA2G12A/PLA2G2C/CYP2U1/PLA2G12B/TBXAS1/PLA2G5/ALOX5/PTGDS/GPX3/PLA2G10/LTA4H/HPGDS/ALOX15B/LTC4S/PLA2G1B
Leukocyte transendothelial migration	Leukocyte transendothelial migration	Leukocyte transendothelial migration	115	-0.495929	-2.25209	1.0792770179296e-09	1.0792770179296e-09	3.66644345803836e-09	6987	tags=43%, list=12%, signal=37%	MYL5/CLDN7/JAM3/VASP/PXN/RAC2/CYBA/PLCG2/SIPA1/PIK3CG/CLDN4/PRKCB/CLDN9/PRKCA/CYBB/TXK/CLDN3/PTK2B/RAPGEF4/AFDN/ITGB2/ITGAM/ITGAL/MYL12A/NCF4/CXCL12/MSN/RASSF5/RHOA/CTNNA1/RAP1A/PIK3R5/NCF2/ACTN2/EZR/CLDN2/ICAM1/CTNND1/GNAI2/MYL9/CLDN23/OCLN/PECAM1/CLDN5/CDH5/CLDN18/RAPGEF3/JAM2/ESAM
Asthma	Asthma	Asthma	28	-0.768134	-2.58867	4.27440341531481e-09	4.27440341531481e-09	1.33211195890081e-08	7664	tags=71%, list=13%, signal=62%	EPX/IL5/PRG2/HLA-DQA2/IL13/FCER1G/HLA-DQA1/IL4/HLA-DMB/HLA-DOA/HLA-DRA/CD40LG/HLA-DPA1/HLA-DQB1/HLA-DRB1/HLA-DPB1/HLA-DRB5/HLA-DMA/MS4A2/FCER1A
Basal transcription factors	Basal transcription factors	Basal transcription factors	35	0.75388471725817	2.34829458831755	4.27776798069555e-09	4.27776798069555e-09	1.33211195890081e-08	6089	tags=63%, list=11%, signal=56%	GTF2H3/TAF2/GTF2E1/TAF5/TBP/GTF2A2/TAF6/TAF11/TBPL1/TAF4B/TAF6L/GTF2A1/GTF2H1/GTF2IRD1/GTF2E2/TAF5L/TAF4/GTF2F2/TAF7L/TAF9/TAF9B/TAF12
p53 signaling pathway	p53 signaling pathway	p53 signaling pathway	68	0.64488448273561	2.25513740008909	4.80996005447957e-09	4.80996005447957e-09	1.43792490049705e-08	5753	tags=41%, list=10%, signal=37%	CHEK1/CCNB2/CCNE2/RRM2/CDK1/CCNB1/CDK2/GTSE1/CCNE1/CHEK2/CDK4/PMAIP1/CASP3/CYCS/ATR/PERP/TP73/CDKN2A/SERPINB5/COP1/BID/CDK6/EI24/SFN/PIDD1/RPRM/DDB2/TP53AIP1
Dilated cardiomyopathy	Dilated cardiomyopathy	Dilated cardiomyopathy	90	-0.535156	-2.32687	5.32143181432522e-09	5.32143181432522e-09	1.52964234338903e-08	5160	tags=39%, list=9%, signal=35%	SLC8A1/CACNA2D4/CACNG4/TGFB1/ITGB3/CACNA1S/ITGA7/CACNA1F/LMNA/SGCG/RYR2/ADCY6/PLN/ADCY7/CACNG6/CACNB4/SGCD/LAMA2/CACNA1C/ITGA3/ITGB6/MYL3/CACNB1/CACNA1D/ITGA1/ADRB1/ITGA10/ADCY9/ITGA9/ADCY4/SGCA/DES/ITGA8/TNNC1/CACNA2D2
Intestinal immune network for IgA production	Intestinal immune network for IgA production	Intestinal immune network for IgA production	45	-0.665007	-2.50275	6.26983686052848e-09	6.26983686052848e-09	1.73551039804102e-08	7395	tags=49%, list=13%, signal=43%	IL5/IL6/TNFRSF13B/CCR9/HLA-DQA2/TGFB1/IL2/HLA-DQA1/IL4/HLA-DMB/CXCL12/HLA-DOA/HLA-DRA/CD40LG/HLA-DPA1/HLA-DQB1/HLA-DRB1/HLA-DPB1/HLA-DRB5/HLA-DMA/PIGR/TNFSF13
Purine metabolism	Purine metabolism	Purine metabolism	158	0.512141145341375	2.00352496481815	1.57075192045554e-08	1.57075192045554e-08	3.98670528989036e-08	6082	tags=39%, list=11%, signal=35%	PRIM1/RRM2/POLE2/RRM1/PRIM2/POLA1/GMPS/GART/POLE/PPAT/POLD3/PAICS/POLD1/POLR2D/POLA2/POLE3/PRPS2/PKM/POLD2/HPRT1/PNPT1/POLR2G/DCK/POLR2H/AK4/NME1/POLR1B/POLR3G/POLR3K/POLR3A/POLR3B/PRPS1/ADA/POLR2B/POLR3F/ATIC/ADCY3/POLR1A/DGUOK/POLR3C/PDE6D/POLR1E/PRUNE1/ADSL/NT5C3A/ADSS2/NUDT2/POLR1C/PDE7A/POLR3D/POLR2K/NT5M/POLR1H/NUDT5/PFAS/POLR2F/POLR2J/NT5C1B/PNP/CANT1/POLR2I/POLR2A
Neuroactive ligand-receptor interaction	Neuroactive ligand-receptor interaction	Neuroactive ligand-receptor interaction	272	-0.355868	-1.83113	1.58305556404996e-08	1.58305556404996e-08	3.98670528989036e-08	7059	tags=27%, list=12%, signal=24%	HRH4/PTGDR/PTAFR/GRM6/SSTR4/P2RX2/ADRA1D/GLP2R/ADORA3/CHRNA10/CHRNA2/PTGER4/P2RX7/ADCYAP1R1/HRH1/ADRA2C/DRD1/C3AR1/FPR1/PTGER3/LHCGR/TSPO/TSHB/GLP1R/GRIN3B/S1PR2/P2RX4/PTGER1/P2RY13/GRIK4/NPFFR1/FPR2/CHRM2/ADRA1B/PTGFR/EDNRA/NR3C1/THRB/P2RX1/APLNR/C5AR1/AVPR2/PTGER2/ADRA2A/TBXA2R/GIPR/CNR1/CYSLTR1/CHRM1/ADRA1A/AGTR1/SSTR1/CALCRL/THRA/CTSG/P2RY14/PTGIR/LEPR/F2RL3/RXFP1/AGTR2/NMUR1/RXFP2/ADRB1/ADRB…
Calcium signaling pathway	Calcium signaling pathway	Calcium signaling pathway	178	-0.415528	-1.98665	1.60029719382923e-08	1.60029719382923e-08	3.98670528989036e-08	6484	tags=39%, list=11%, signal=34%	P2RX2/ADRA1D/SLC8A1/SLC8A3/PDE1A/P2RX7/PLCG2/ITPR2/HRH1/BST1/ITPKB/MYLK3/DRD1/GNA11/PRKCB/TNNC2/PTGER3/LHCGR/CHP1/PDGFRB/PRKCA/CACNA1S/MYLK/PTK2B/CACNA1F/CAMK2D/CALM1/PPP3CA/PPP3CC/NOS3/P2RX4/RYR2/CAMK2A/PLN/PTGER1/ERBB2/ADCY7/ATP2B4/CHRM2/PLCE1/ADRA1B/PTGFR/EDNRA/CACNA1H/P2RX1/ERBB3/PDE1C/SLC25A4/CACNA1C/PHKB/TBXA2R/ITPR1/PLCD1/CYSLTR1/CHRM1/ADRA1A/AGTR1/PLCB2/CACNA1D/PDE1B/ADRB1/ADRB2/ERBB4/GNA…
PPAR signaling pathway	PPAR signaling pathway	PPAR signaling pathway	69	-0.553998	-2.2941	1.12416540264263e-07	1.12416540264263e-07	2.71021200637102e-07	7580	tags=43%, list=13%, signal=38%	ACSL4/ACOX1/ACOX3/APOA5/RXRA/GK/CYP4A22/APOA1/CYP7A1/CYP4A11/PDPK1/PPARG/SCP2/ACSL1/ILK/HMGCS2/FABP3/CD36/CYP27A1/RXRG/OLR1/ACSL5/AQP7/SORBS1/FABP4/ACADL/ACOX2/LPL/SLC27A1/ACAA1
Progesterone-mediated oocyte maturation	Progesterone-mediated oocyte maturation	Progesterone-mediated oocyte maturation	85	0.581069938325059	2.1000661409973	1.60357164997135e-07	1.60357164997135e-07	3.74518378776203e-07	7567	tags=44%, list=13%, signal=38%	CCNB2/BUB1/CDK1/CCNA2/PLK1/MAD2L1/CCNB1/CDK2/CDC25C/CDC25A/PKMYT1/MAD2L2/CDC27/ANAPC1/GNAI3/ANAPC7/ANAPC5/MAP2K1/HSP90AA1/CDC23/ADCY3/HSP90AB1/CDC25B/AKT2/MAPK8/PIK3CB/PIK3CA/MAPK12/PRKX/ANAPC11/MAPK14/SPDYA/KRAS/IGF1R/SPDYC/FZR1/ANAPC13
Viral myocarditis	Viral myocarditis	Viral myocarditis	68	-0.537763	-2.21747	2.23034196397133e-07	2.23034196397133e-07	5.05117318794146e-07	7268	tags=49%, list=13%, signal=42%	HLA-B/HLA-F/HLA-C/FYN/HLA-DQA2/RAC2/MYH1/CCND1/SGCG/ITGB2/HLA-DQA1/ITGAL/MYH14/HLA-DMB/MYH2/MYH10/SGCD/HLA-DOA/HLA-DRA/CD40LG/LAMA2/HLA-DPA1/ICAM1/HLA-DQB1/HLA-DRB1/HLA-DPB1/HLA-DRB5/CAV1/HLA-E/MYH11/HLA-DMA/SGCA/CD55
Hypertrophic cardiomyopathy (HCM)	Hypertrophic cardiomyopathy (HCM)	Hypertrophic cardiomyopathy (HCM)	83	-0.509714	-2.17111	2.50949712662752e-07	2.50949712662752e-07	5.51623207401095e-07	7370	tags=41%, list=13%, signal=36%	PRKAG2/TGFB2/IL6/SLC8A1/CACNA2D4/CACNG4/TGFB1/ITGB3/CACNA1S/ITGA7/CACNA1F/LMNA/SGCG/RYR2/CACNG6/CACNB4/SGCD/LAMA2/CACNA1C/ITGA3/ITGB6/MYL3/PRKAB1/CACNB1/CACNA1D/ITGA1/ITGA10/ACE/ITGA9/SGCA/DES/ITGA8/TNNC1/CACNA2D2
Allograft rejection	Allograft rejection	Allograft rejection	35	-0.681017	-2.43152	3.54280784057922e-07	3.54280784057922e-07	7.3803457427891e-07	9481	tags=74%, list=17%, signal=62%	HLA-DOB/HLA-G/HLA-A/PRF1/CD86/FAS/IL5/HLA-B/HLA-F/HLA-C/HLA-DQA2/IL12B/IL2/HLA-DQA1/IL4/HLA-DMB/HLA-DOA/HLA-DRA/CD40LG/HLA-DPA1/HLA-DQB1/HLA-DRB1/HLA-DPB1/HLA-DRB5/HLA-E/HLA-DMA
Parkinson's disease	Parkinson's disease	Parkinson's disease	130	0.507027728129249	1.9265553686651	3.5550397803294e-07	3.5550397803294e-07	7.3803457427891e-07	9758	tags=51%, list=17%, signal=42%	UQCRH/ATP5F1B/CASP3/CYCS/VDAC3/CYC1/NDUFS6/COX5A/VDAC1/UBE2G1/VDAC2/NDUFS1/NDUFB4/UQCRHL/ATP5MC3/ATP5MC1/PPID/UQCRC1/SDHB/NDUFB5/SLC25A5/UCHL1/NDUFAB1/HTRA2/UQCRFS1/NDUFB3/NDUFA9/ATP5PB/ATP5F1C/COX6B1/COX8A/NDUFS3/SDHC/COX7A2L/UBE2L3/NDUFS5/NDUFS2/NDUFV1/COX7A2/UBE2J2/NDUFB6/NDUFA4L2/NDUFA8/ATP5PD/GPR37/NDUFA6/COX7B/COX5B/ATP5PF/NDUFB9/COX6A1/ATP5F1A/UQCRC2/COX6B2/PARK7/NDUFS8/NDUFA10/VDAC2P5/ATP…
Alzheimer's disease	Alzheimer's disease	Alzheimer's disease	166	0.481516642576893	1.89382915799591	3.87516209948203e-07	3.87516209948203e-07	7.82749670165646e-07	8017	tags=40%, list=14%, signal=35%	GAPDH/UQCRH/ATP5F1B/CASP3/CYCS/NAE1/CDK5R1/CYC1/NDUFS6/COX5A/HSD17B10/NDUFS1/NDUFB4/UQCRHL/PPP3R1/ATP5MC3/ATP5MC1/UQCRC1/SDHB/NDUFB5/ADAM10/ATP2A2/GSK3B/BID/NDUFAB1/UQCRFS1/NDUFB3/NDUFA9/ATP5PB/ATP5F1C/APH1A/COX6B1/COX8A/CALML5/NDUFS3/CALML3/SDHC/ADAM17/COX7A2L/ATP2A1/NDUFS5/NDUFS2/CDK5/NDUFV1/COX7A2/CALM3/FADD/PLCB1/NDUFB6/NDUFA4L2/NDUFA8/ATP5PD/NDUFA6/COX7B/COX5B/ATP5PF/NDUFB9/PLCB3/COX6A1/ATP5…
MAPK signaling pathway	MAPK signaling pathway	MAPK signaling pathway	267	-0.339631	-1.7215	4.11389237409605e-07	4.11389237409605e-07	8.09103486318059e-07	6113	tags=28%, list=11%, signal=25%	RAC2/CACNA2D4/DUSP16/TNFRSF1A/RASGRP3/FGF9/MAPK9/PRKCB/CACNG4/TGFB1/FGF22/CHP1/PDGFRB/PTPN5/PRKCA/CACNA1S/MAP3K6/CACNA1F/PDGFA/PPP3CA/MRAS/PLA2G2A/PPP3CC/NFATC2/FGF7/CACNG6/TAOK2/MAPK3/FGF10/CACNB4/PDGFB/ARRB2/CACNA1H/JUN/RAP1A/TAOK3/GADD45G/PLA2G12A/PLA2G2C/RPS6KA3/MAP2K3/RPS6KA1/FGF18/CACNA1C/FGF14/MECOM/PLA2G12B/MAP3K8/MAP3K3/PLA2G5/CACNB1/RASGRP2/MAPKAPK3/CACNA1D/FGFR4/MEF2C/RAPGEF2/DUSP3/DUS…
Focal adhesion	Focal adhesion	Focal adhesion	199	-0.369767	-1.82061	8.01350221047535e-07	8.01350221047535e-07	1.53565089593455e-06	6987	tags=35%, list=12%, signal=31%	MYL5/CRK/CCND2/MAPK10/VTN/VASP/FYN/PXN/RAC2/FLT1/PTEN/DOCK1/PIK3CG/VEGFB/MAPK9/MYLK3/PRKCB/ITGB3/PIP5K1C/CHAD/PDGFRB/THBS3/PRKCA/MYLK/ZYX/TLN1/ITGA7/CCND1/LAMA4/PDGFA/PDPK1/ERBB2/MAPK3/MYL12A/PDGFB/RHOA/JUN/RAP1A/PIK3R5/TNR/ACTN2/PARVG/HGF/LAMA2/ILK/ITGA3/LAMC3/ITGB6/CAV2/SHC2/PARVA/KDR/FLT4/CAPN2/CAV1/ITGA1/MYL9/CCND3/COL6A6/ITGA10/CAV3/VWF/COL4A4/ITGA9/SHC3/LAMB2/RASGRF1/TNXB/ITGA8/VEGFD
RNA polymerase	RNA polymerase	RNA polymerase	29	0.741768652478121	2.22790193725608	8.761216589305e-07	8.761216589305e-07	1.63696415221225e-06	6082	tags=72%, list=11%, signal=65%	POLR2D/POLR2G/POLR2H/POLR1B/POLR3G/POLR3K/POLR3A/POLR3B/POLR2B/POLR3F/POLR1A/POLR3C/POLR1E/POLR1C/POLR3D/POLR2K/POLR1H/POLR2F/POLR2J/POLR2I/POLR2A
Autoimmune thyroid disease	Autoimmune thyroid disease	Autoimmune thyroid disease	50	-0.582903	-2.25267	1.05170648871985e-06	1.05170648871985e-06	1.9171029704521e-06	10092	tags=54%, list=18%, signal=44%	HLA-DOB/IFNA5/HLA-G/HLA-A/PRF1/CD86/FAS/IL5/HLA-B/HLA-F/HLA-C/HLA-DQA2/TSHB/IL2/HLA-DQA1/IL4/HLA-DMB/HLA-DOA/HLA-DRA/CD40LG/HLA-DPA1/HLA-DQB1/HLA-DRB1/HLA-DPB1/HLA-DRB5/HLA-E/HLA-DMA
Graft-versus-host disease	Graft-versus-host disease	Graft-versus-host disease	37	-0.653026	-2.37658	1.33634132534083e-06	1.33634132534083e-06	2.37795072930323e-06	10092	tags=68%, list=18%, signal=56%	HLA-DOB/KIR2DL3/HLA-G/HLA-A/PRF1/CD86/FAS/HLA-B/IL6/HLA-F/HLA-C/HLA-DQA2/KIR3DL1/IL2/HLA-DQA1/HLA-DMB/HLA-DOA/HLA-DRA/HLA-DPA1/HLA-DQB1/HLA-DRB1/HLA-DPB1/HLA-DRB5/HLA-E/HLA-DMA
Leishmania infection	Leishmania infection	Leishmania infection	70	-0.498959	-2.063	6.39460067110729e-06	6.39460067110729e-06	1.11142386205292e-05	7643	tags=53%, list=13%, signal=46%	FCGR3A/NCF1/FCGR1A/TGFB2/JAK1/HLA-DQA2/CYBA/IFNGR1/PRKCB/IL12B/TGFB1/PTPN6/CR1/ITGB2/ITGAM/HLA-DQA1/FCGR2A/MAPK3/IL4/TLR4/HLA-DMB/NCF4/JUN/NCF2/HLA-DOA/HLA-DRA/MYD88/HLA-DPA1/HLA-DQB1/HLA-DRB1/HLA-DPB1/HLA-DRB5/NFKBIA/HLA-DMA/C3/TLR2/FOS
Jak-STAT signaling pathway	Jak-STAT signaling pathway	Jak-STAT signaling pathway	155	-0.371798	-1.78106	9.98326727744761e-06	9.98326727744761e-06	1.69572243229373e-05	7522	tags=37%, list=13%, signal=32%	STAT4/CSF2RB/BCL2L1/STAM2/IL5/OSMR/IL7/IL6/IL13RA1/CCND2/IL2RG/JAK1/CNTFR/IFNAR1/IL10RA/STAT3/SPRED2/IFNAR2/PIK3CG/IFNGR1/IL13/IL12B/IL10RB/CLCF1/MPL/PTPN6/LIF/IL2/CSF2RA/CCND1/STAT5A/IL4R/SPRED1/SOCS3/IL4/IL7R/CSF2/PIK3R5/CSF3/IL11RA/SPRY2/STAT5B/LIFR/SPRY1/CTF1/SOCS2/STAT6/IL5RA/EPOR/LEPR/CCND3/CSF3R/IL3RA/IL6ST/SPRY4/IL6R/CISH
Tight junction	Tight junction	Tight junction	130	-0.39106	-1.80959	1.56222977517011e-05	1.56222977517011e-05	2.59458044531176e-05	6669	tags=35%, list=12%, signal=31%	CLDN7/JAM3/EPB41L3/MAGI2/PTEN/CLDN4/PRKCB/CLDN9/PRKCH/PRKCA/SPTAN1/CLDN3/MYH1/MRAS/AFDN/EPB41L1/VAPA/MYH14/MYL12A/TJP1/RHOA/LLGL2/CTNNA1/MYH2/ACTN2/MYH10/CLDN2/TJP3/PPP2CB/CRB3/GNAI2/MAGI3/CGN/MYL9/CLDN23/OCLN/MYH11/PARD6B/PRKCZ/PRKCE/RRAS/MAGI1/CLDN5/CLDN18/JAM2/PRKCD
Lysine degradation	Lysine degradation	Lysine degradation	44	0.613319164940022	2.00209835919503	2.04024595904533e-05	2.04024595904533e-05	3.31481608906679e-05	8615	tags=55%, list=15%, signal=46%	SUV39H2/SUV39H1/NSD2/PLOD2/ACAT2/TMLHE/EHMT2/KMT5A/EHHADH/NSD3/SETDB1/AASDHPPT/ALDH1B1/PLOD1/OGDHL/KMT5C/EHMT1/GCDH/SETD1A/PIPOX/BBOX1/DOT1L/NSD1/AASDH
Linoleic acid metabolism	Linoleic acid metabolism	Linoleic acid metabolism	29	-0.646818	-2.21068	2.64105696875177e-05	2.64105696875177e-05	4.19966505669375e-05	4249	tags=45%, list=7%, signal=42%	PLA2G4E/ALOX15/CYP2C8/CYP3A5/PLA2G2A/CYP1A2/CYP3A7/PLA2G12A/PLA2G2C/PLA2G12B/PLA2G5/PLA2G10/PLA2G1B
Chemokine signaling pathway	Chemokine signaling pathway	Chemokine signaling pathway	187	-0.341295	-1.62355	2.70998594704358e-05	2.70998594704358e-05	4.21949566315996e-05	7115	tags=35%, list=12%, signal=31%	LYN/NCF1/CXCL5/CRK/HCK/CCR9/CCR4/CCR7/GRK3/CCR1/CCL15/PXN/XCR1/RAC2/CCL24/CCL22/STAT3/PIK3CG/PREX1/CCR6/CCR2/PRKCB/CCL13/PTK2B/DOCK2/GNG2/WAS/CXCR2/CXCR1/ADCY6/ADCY7/MAPK3/CCL16/ARRB2/CXCL12/RHOA/ELMO1/CXCL3/RAP1A/PIK3R5/GNGT2/CX3CL1/PF4/STAT5B/FGR/PPBP/SHC2/GNAI2/PLCB2/CCL17/NFKBIA/RASGRP2/GRK5/CCL14/GNG11/PRKCZ/CXCL2/CCL23/ADCY9/CX3CR1/SHC3/ADCY4/ARRB1/GNG7/PRKCD/CXCL16
Oxidative phosphorylation	Oxidative phosphorylation	Oxidative phosphorylation	132	0.458840910537193	1.74636248380089	5.20331601004829e-05	5.20331601004829e-05	7.93631442993401e-05	9758	tags=44%, list=17%, signal=36%	UQCRH/ATP5F1B/CYC1/NDUFS6/COX5A/NDUFS1/NDUFB4/UQCRHL/ATP5MC3/ATP5MC1/UQCRC1/SDHB/NDUFB5/COX10/NDUFAB1/ATP6V1A/UQCRFS1/NDUFB3/NDUFA9/ATP5PB/ATP5F1C/COX6B1/COX8A/NDUFS3/SDHC/COX7A2L/NDUFS5/NDUFS2/NDUFV1/COX7A2/NDUFB6/NDUFA4L2/NDUFA8/ATP5PD/NDUFA6/COX7B/ATP6V0A2/COX5B/ATP5PF/NDUFB9/ATP5MF/ATP6V1E2/COX6A1/ATP5F1A/UQCRC2/COX6B2/NDUFS8/NDUFA10/ATP6V1G2/ATP4A/ATP5MC2/ATP6V0B/SDHA/COX7B2/ATP6V1C1/COX17/C…
Arrhythmogenic right ventricular cardiomyopathy (ARVC)	Arrhythmogenic right ventricular cardiomyopathy (ARVC)	Arrhythmogenic right ventricular cardiomyopathy (ARVC)	74	-0.445422	-1.86601	7.70007087998137e-05	7.70007087998137e-05	0.0001150957963113	6130	tags=39%, list=11%, signal=35%	SLC8A1/CACNA2D4/CACNG4/ITGB3/CACNA1S/ITGA7/CACNA1F/LMNA/SGCG/RYR2/CACNG6/CACNB4/CTNNA1/ACTN2/SGCD/LAMA2/TCF7L2/CACNA1C/ITGA3/ITGB6/CACNB1/CACNA1D/ITGA1/ITGA10/ITGA9/SGCA/DES/ITGA8/CACNA2D2
Aldosterone-regulated sodium reabsorption	Aldosterone-regulated sodium reabsorption	Aldosterone-regulated sodium reabsorption	42	-0.547566	-2.01399	7.91826772609531e-05	7.91826772609531e-05	0.000116036534273017	5641	tags=40%, list=10%, signal=36%	PIK3CG/PRKCB/PRKCA/PDPK1/ATP1B1/MAPK3/IRS2/PIK3R5/FXYD4/SCNN1A/SCNN1G/NEDD4L/NR3C2/ATP1B2/SCNN1B/ATP1A2/SLC9A3R2
One carbon pool by folate	One carbon pool by folate	One carbon pool by folate	17	0.761886	2.00882481458229	9.5389052734839e-05	9.5389052734839e-05	0.000137097626400275	1602	tags=47%, list=3%, signal=46%	TYMS/GART/DHFR/MTHFD1/SHMT2/MTHFD2/MTHFD1L/ATIC
Systemic lupus erythematosus	Systemic lupus erythematosus	Systemic lupus erythematosus	136	0.446691548441894	1.71234624546241	0.000134492366090023	0.000134492366090023	0.000189651598657232	11685	tags=53%, list=21%, signal=42%	H2AZ1/SNRPD1/H2BC11/H2AX/SNRPB/H2AC11/SSB/H2AZ2/H2BC17/MACROH2A1/H2BC9/MACROH2A2/H2AC8/H3C8/H2BC8/H3C2/H2AC13/H2BC7/H3C12/H2AC16/H3C10/H3C3/RO60/H2BC12/H2AC20/IFNG/H3C7/H3-3A/H2BC13/H2AC14/H4C9/H4C12/H2AC12/H4C5/H4C4/H2AW/H2BC5/SNRPD3/H3C1/H2BC18/H2BC14/H4C3/H4-16/H4C14/H3-3B/H3C11/H2AC17/H2AC4/H2BC6/H3C13/ACTN1/H4C7/H2BC10/H3-5/H2BW2/H4C1/H4C11/H2AC21/H3C15/H4C15/H4C2/H2BU1/H2BW1/H2AC19/H4C8/H2B…
Cysteine and methionine metabolism	Cysteine and methionine metabolism	Cysteine and methionine metabolism	34	0.620112342069608	1.9154903928738	0.000159850386654337	0.000159850386654337	0.000219828411841065	9389	tags=53%, list=16%, signal=44%	DNMT1/ENOPH1/AHCY/DNMT3B/LDHA/DNMT3A/SMS/SRM/GOT2/CBS/GOT1/IL4I1/SDS/AMD1/MTAP/LDHB/MAT1A/LDHC
Small cell lung cancer	Small cell lung cancer	Small cell lung cancer	84	0.497235458883665	1.79015951196162	0.000164149877291491	0.000164149877291491	0.000219828411841065	7993	tags=38%, list=14%, signal=33%	CCNE2/E2F2/CDK2/E2F1/SKP2/CKS1B/CCNE1/E2F3/CDK4/CYCS/CDK6/AKT2/PIAS2/PIK3CB/PIK3CA/PIAS4/CHUK/ITGA6/LAMA1/BIRC2/BCL2/ITGAV/TRAF4/TRAF3/NOS2/COL4A6/RARB/MYC/TRAF2/PIAS3/CDKN1B/IKBKG
Drug metabolism - cytochrome P450	Drug metabolism - cytochrome P450	Drug metabolism - cytochrome P450	71	-0.448216	-1.8626	0.000164716500140066	0.000164716500140066	0.000219828411841065	10584	tags=41%, list=19%, signal=33%	UGT2B11/ADH6/CYP2A7/CYP2C9/CYP2A13/MGST1/UGT2B4/CYP2C8/UGT2B15/FMO3/GSTA5/GSTK1/MGST3/MGST2/CYP2A6/CYP3A5/GSTA2/AOX1/CYP1A2/GSTA3/CYP3A7/ADH1A/MAOB/FMO2/MAOA/FMO5/GSTM5/ALDH3B1/ADH1B
GnRH signaling pathway	GnRH signaling pathway	GnRH signaling pathway	101	-0.387617	-1.71814	0.000196351434790972	0.000196351434790972	0.000257450634721312	5660	tags=33%, list=10%, signal=29%	ITPR2/MAPK9/GNA11/PRKCB/PRKCA/CACNA1S/PTK2B/CACNA1F/CAMK2D/CALM1/PLA2G2A/CAMK2A/ADCY6/ADCY7/MAPK3/JUN/PLA2G12A/PLA2G2C/MAP2K3/CACNA1C/HBEGF/PLA2G12B/ITPR1/MAP3K3/PLA2G5/PLCB2/CACNA1D/GNAQ/ADCY9/ADCY4/PLA2G10/PRKCD/PLA2G1B
Citrate cycle (TCA cycle)	Citrate cycle (TCA cycle)	Citrate cycle (TCA cycle)	31	0.635809744046245	1.92722881877036	0.000238317321550247	0.000238317321550247	0.000307087655718104	11897	tags=68%, list=21%, signal=54%	IDH2/MDH1/CS/FH/DLAT/IDH3A/MDH2/SDHB/ACLY/DLD/IDH3B/PDHA1/SDHC/OGDHL/SUCLG1/SDHA/SUCLA2/SDHD/PC/IDH1/ACO2
Type I diabetes mellitus	Type I diabetes mellitus	Type I diabetes mellitus	41	-0.520244	-1.89656	0.000257422567510192	0.000257422567510192	0.000326083894615944	9481	tags=59%, list=17%, signal=49%	HLA-G/HLA-A/PRF1/CD86/FAS/HLA-B/HLA-F/HLA-C/HLA-DQA2/ICA1/IL12B/IL2/HLA-DQA1/HLA-DMB/HLA-DOA/HLA-DRA/HLA-DPA1/PTPRN2/HLA-DQB1/HLA-DRB1/HLA-DPB1/HLA-DRB5/HLA-E/HLA-DMA
ECM-receptor interaction	ECM-receptor interaction	ECM-receptor interaction	83	-0.409221	-1.74306	0.000267207338192201	0.000267207338192201	0.000329623253309367	5478	tags=30%, list=10%, signal=27%	GP6/ITGB3/CHAD/THBS3/SDC2/ITGA7/LAMA4/TNR/LAMA2/CD47/ITGA3/LAMC3/ITGB6/SDC4/CD36/ITGA1/COL6A6/GP9/ITGA10/VWF/COL4A4/ITGA9/LAMB2/TNXB/ITGA8
Pathways in cancer	Pathways in cancer	Pathways in cancer	325	0.366662248269558	1.51977572114836	0.000269037570834899	0.000269037570834899	0.000329623253309367	7747	tags=28%, list=14%, signal=25%	CCNE2/RAD51/E2F2/CDK2/MSH2/BIRC5/E2F1/MSH6/SKP2/CKS1B/CCNE1/E2F3/HDAC2/HDAC1/CDK4/BRCA2/SLC2A1/CUL2/NRAS/TFG/CASP3/CYCS/MAP2K1/RAC3/HSP90AA1/DVL3/FH/EGLN3/CDKN2A/TPM3/MTOR/ELOC/STAT1/GSK3B/CRKL/DVL2/BID/CDK6/HSP90AB1/HIF1A/AKT2/SMO/CBLC/EGLN1/PIAS2/MAPK8/PIK3CB/FGF12/MMP1/PIK3CA/HRAS/LEF1/SMAD3/MMP9/TPR/PLD1/PGF/SOS1/FADD/PIAS4/CHUK/FGF11/ITGA6/HSP90B1/LAMA1/BIRC2/BCL2/MSH3/ITGAV/JUP/TRAF4/CBLB/T…
Fc epsilon RI signaling pathway	Fc epsilon RI signaling pathway	Fc epsilon RI signaling pathway	79	-0.422778	-1.78848	0.000404857207874647	0.000404857207874647	0.000488028213227503	8561	tags=47%, list=15%, signal=40%	PIK3R1/PLA2G4E/LCP2/SOS2/VAV1/LYN/IL5/MAPK10/FYN/RAC2/INPP5D/PLCG2/PIK3CG/MAPK9/IL13/PRKCB/FCER1G/PRKCA/PLA2G2A/PDPK1/MAPK3/IL4/CSF2/GAB2/PIK3R5/PLA2G12A/PLA2G2C/MAP2K3/BTK/PLA2G12B/PLA2G5/PRKCE/MS4A2/FCER1A/PLA2G10/PRKCD/PLA2G1B
Non-homologous end-joining	Non-homologous end-joining	Non-homologous end-joining	13	0.749989892099886	1.85839368709476	0.000561467500955248	0.000561467500955248	0.000665424299737857	2649	tags=46%, list=5%, signal=44%	FEN1/PRKDC/XRCC5/MRE11/XRCC6/DCLRE1C
Endocytosis	Endocytosis	Endocytosis	181	-0.323619	-1.54365	0.000569828132733264	0.000569828132733264	0.000665424299737857	6896	tags=33%, list=12%, signal=29%	RAB5C/HLA-F/SMURF2/IL2RG/RAB31/GRK3/HLA-C/RAB11B/FLT1/KIT/CSF1R/RAB11FIP3/RAB11FIP4/ARAP2/DNM2/PIP5K1C/CHMP6/CXCR2/PSD4/CXCR1/SH3KBP1/VPS36/RAB5A/CHMP3/LDLR/RAB11FIP5/EHD1/ASAP3/ARRB2/RAB5B/DNM3/RUFY1/AP2A2/RAB11FIP2/RBSN/ERBB3/ARAP1/IQSEC2/VPS37B/PDCD6IP/RAB11FIP1/MVB12B/DAB2/ARAP3/KDR/NEDD4L/HLA-E/FGFR4/PIP5K1B/PARD6B/IQSEC3/IQSEC1/GRK5/ADRB1/ADRB2/PRKCZ/ERBB4/EHD2/ARRB1
Protein export	Protein export	Protein export	24	0.643407260758755	1.85247042317593	0.000671198301165045	0.000671198301165045	0.000771742176238351	9817	tags=50%, list=17%, signal=41%	SRPRB/IMMP1L/SEC61A2/SRP68/SRP72/SRP9/SEC61A1/SEC61G/SRP54/SRP14/SRP9P1/SEC11A
Glycosphingolipid biosynthesis - ganglio series	Glycosphingolipid biosynthesis - ganglio series	Glycosphingolipid biosynthesis - ganglio series	15	-0.709645	-2.09277	0.000775722538222725	0.000775722538222725	0.00087840989176736	6249	tags=73%, list=11%, signal=65%	HEXA/ST3GAL2/ST6GALNAC3/B3GALT4/HEXB/ST6GALNAC5/GLB1/ST6GALNAC6/ST3GAL1/ST6GALNAC4/ST3GAL5
alpha-Linolenic acid metabolism	alpha-Linolenic acid metabolism	alpha-Linolenic acid metabolism	19	-0.633742	-1.96607	0.000877744207076539	0.000877744207076539	0.000979101943478936	8401	tags=53%, list=15%, signal=45%	PLA2G4E/ACOX1/ACOX3/PLA2G2A/PLA2G12A/PLA2G2C/PLA2G12B/PLA2G5/PLA2G10/PLA2G1B
Glyoxylate and dicarboxylate metabolism	Glyoxylate and dicarboxylate metabolism	Glyoxylate and dicarboxylate metabolism	15	0.724561266899917	1.86085428110781	0.000926558549830885	0.000926558549830885	0.00101835382411754	5919	tags=53%, list=10%, signal=48%	MTHFD1/MTHFD2/MTHFD1L/MDH1/CS/MDH2/PGP/AFMID
Glycerophospholipid metabolism	Glycerophospholipid metabolism	Glycerophospholipid metabolism	76	-0.401143	-1.68445	0.000944759370086934	0.000944759370086934	0.00102330915753123	5480	tags=29%, list=10%, signal=26%	CHKA/CDS2/PLPP1/PLA2G2A/CDIPT/ACHE/LCAT/PLA2G12A/PLA2G2C/DGKD/PLA2G15/PLPP3/CRLS1/PLA2G12B/CDS1/PLA2G5/LPCAT1/AGPAT2/PLA2G10/GPD1/GPD1L/PLA2G1B
Pentose phosphate pathway	Pentose phosphate pathway	Pentose phosphate pathway	27	0.617041808628286	1.8337887751687	0.0010932574833475	0.0010932574833475	0.0011672373130477	5776	tags=52%, list=10%, signal=47%	PRPS2/RPE/GPI/PGM2/PFKP/PRPS1/RPIA/ALDOC/DERA/ALDOA/PFKM/PGD/G6PD/PFKL
Primary bile acid biosynthesis	Primary bile acid biosynthesis	Primary bile acid biosynthesis	16	-0.668333	-1.99549	0.00128574221106698	0.00128574221106698	0.00135341285375471	7501	tags=75%, list=13%, signal=65%	CYP8B1/HSD3B7/CYP7B1/CYP46A1/BAAT/CYP7A1/CYP39A1/CH25H/SCP2/CYP27A1/HSD17B4/ACOX2
N-Glycan biosynthesis	N-Glycan biosynthesis	N-Glycan biosynthesis	46	0.537625817190801	1.7657663966127	0.00151058895956335	0.00151058895956335	0.00156800900773389	10042	tags=43%, list=18%, signal=36%	GANAB/ALG10/ALG6/DPM1/B4GALT2/RPN1/ALG3/DOLPP1/DDOST/STT3A/RPN2/ALG8/TUSC3/B4GALT3/ALG10B/MAN1A2/ALG9/MOGS/MGAT5B/RFT1
Glycosaminoglycan degradation	Glycosaminoglycan degradation	Glycosaminoglycan degradation	21	-0.617936	-1.9562	0.00205110703343954	0.00205110703343954	0.00209990770546802	6249	tags=62%, list=11%, signal=55%	IDS/GUSB/HEXA/HGSNAT/GNS/HEXB/GLB1/NAGLU/SGSH/IDUA/HPSE2/HYAL1/HYAL2
Long-term depression	Long-term depression	Long-term depression	70	-0.393458	-1.62679	0.0022194269460995	0.0022194269460995	0.00224152650317304	5660	tags=31%, list=10%, signal=28%	ITPR2/GNA11/PRKCB/PRKCA/ARAF/PLA2G2A/MAPK3/GUCY1A1/PLA2G12A/PLA2G2C/PRKG1/PLA2G12B/ITPR1/PPP2CB/PLA2G5/GNAI2/PLCB2/GNAQ/GUCY1A2/GRIA1/PLA2G10/PLA2G1B
Ether lipid metabolism	Ether lipid metabolism	Ether lipid metabolism	33	-0.499578	-1.77925	0.00237159250741447	0.00237159250741447	0.00236327113019547	5041	tags=36%, list=9%, signal=33%	PLPP1/PLA2G2A/ENPP2/PAFAH2/PLA2G12A/PLA2G2C/PLPP3/PLA2G12B/PLA2G5/LPCAT1/PLA2G10/PLA2G1B
Fatty acid metabolism	Fatty acid metabolism	Fatty acid metabolism	42	-0.471157	-1.73295	0.00277132377522095	0.00277132377522095	0.00272526299225329	7651	tags=45%, list=13%, signal=39%	ECI2/ACSL4/ACAA2/ACOX1/ACOX3/CYP4A22/CYP4A11/ALDH3A2/ACADSB/ACADVL/ADH1A/ACSL1/ACAT1/ACADS/ACSL5/ACADL/ALDH2/ACAA1/ADH1B
Pancreatic cancer	Pancreatic cancer	Pancreatic cancer	70	0.471399070915149	1.66092323167462	0.00320087257659659	0.00320087257659659	0.00310679361501515	7993	tags=34%, list=14%, signal=30%	RAD51/E2F2/E2F1/E2F3/CDK4/BRCA2/MAP2K1/RAC3/CDKN2A/STAT1/CDK6/AKT2/MAPK8/PIK3CB/PIK3CA/SMAD3/PLD1/PGF/CHUK/KRAS/RALA/RALBP1/RAC1/IKBKG
Glycolysis / Gluconeogenesis	Glycolysis / Gluconeogenesis	Glycolysis / Gluconeogenesis	60	0.478857949724619	1.64026179820512	0.00355828662951201	0.00355828662951201	0.00340942443583472	8058	tags=43%, list=14%, signal=37%	GAPDH/TPI1/PKM/PGAM1/GPI/ENO1/PGK1/PGM2/LDHA/PFKP/DLAT/DLD/ALDH3B2/PDHA1/ALDH1B1/ALDOC/PGAM4/HK2/ENO2/ALDOA/PFKM/PFKL/AKR1A1/ADH5/LDHB/ADH7
Renin-angiotensin system	Renin-angiotensin system	Renin-angiotensin system	17	-0.627985	-1.92225	0.00392567139458316	0.00392567139458316	0.00371382636929253	6414	tags=71%, list=11%, signal=63%	ENPEP/AGT/CTSA/ANPEP/ACE2/REN/CMA1/CPA3/AGTR1/CTSG/AGTR2/ACE
Fructose and mannose metabolism	Fructose and mannose metabolism	Fructose and mannose metabolism	34	0.546274580299419	1.68740990856983	0.00467458765884442	0.00467458765884442	0.00436704899707834	6024	tags=50%, list=11%, signal=45%	TPI1/SORD/PFKP/MTMR2/PFKFB4/MTMR1/MPI/GMDS/ALDOC/PMM2/HK2/KHK/ALDOA/PFKM/AKR1B10/PFKL/FPGT
Prostate cancer	Prostate cancer	Prostate cancer	89	0.436720755368903	1.5973228435088	0.00484854942645561	0.00484854942645561	0.00447364534474786	7993	tags=30%, list=14%, signal=26%	CCNE2/E2F2/CDK2/E2F1/CCNE1/E2F3/NRAS/MAP2K1/HSP90AA1/MTOR/GSK3B/HSP90AB1/AKT2/PIK3CB/PIK3CA/HRAS/LEF1/SOS1/CHUK/HSP90B1/BCL2/KRAS/CREB1/IGF1R/CREB3L4/CDKN1B/IKBKG
O-Glycan biosynthesis	O-Glycan biosynthesis	O-Glycan biosynthesis	30	-0.486913	-1.692	0.00565728302432217	0.00565728302432217	0.00515618863577502	5373	tags=47%, list=9%, signal=42%	GALNTL6/GALNT16/B3GNT6/ST3GAL2/GALNT11/GALNT15/ST6GALNAC1/GCNT4/ST3GAL1/GALNT18/GALNT17/GALNT10/GALNT12/GALNT5
Metabolism of xenobiotics by cytochrome P450	Metabolism of xenobiotics by cytochrome P450	Metabolism of xenobiotics by cytochrome P450	69	-0.370909	-1.53593	0.00717034097085052	0.00717034097085052	0.00645648965035367	7486	tags=30%, list=13%, signal=26%	MGST1/UGT2B4/CYP2C8/DHDH/UGT2B15/CYP1A1/GSTA5/GSTK1/MGST3/MGST2/CYP3A5/GSTA2/CYP2F1/CYP1A2/GSTA3/CYP3A7/ADH1A/EPHX1/GSTM5/ALDH3B1/ADH1B
Glioma	Glioma	Glioma	65	0.45608440804642	1.58906892852827	0.00771185143718471	0.00771185143718471	0.00678406027969503	4517	tags=28%, list=8%, signal=26%	E2F2/E2F1/E2F3/CDK4/NRAS/MAP2K1/CDKN2A/MTOR/CDK6/AKT2/CALML5/CALML3/PIK3CB/PIK3CA/HRAS/CALM3/SOS1/CAMK2B
Sulfur metabolism	Sulfur metabolism	Sulfur metabolism	13	-0.647835	-1.84464	0.00771567419134329	0.00771567419134329	0.00678406027969503	3166	tags=54%, list=6%, signal=51%	CHST13/SULT2B1/CHST12/SUOX/PAPSS2/SULT1A2/SULT1A1
Vasopressin-regulated water reabsorption	Vasopressin-regulated water reabsorption	Vasopressin-regulated water reabsorption	44	-0.420493	-1.58208	0.00791649082601878	0.00791649082601878	0.00680061522864287	7297	tags=45%, list=13%, signal=40%	CREB5/DYNC1LI2/RAB5C/DCTN6/DYNC2LI1/DYNC2H1/RAB11B/AQP2/STX4/CREB3L2/ADCY6/RAB5A/RAB5B/AVPR2/AQP3/ARHGDIB/CREB3L1/ADCY9/VAMP2/AQP4
ABC transporters	ABC transporters	ABC transporters	44	-0.418368	-1.57408	0.00791649082601878	0.00791649082601878	0.00680061522864287	7371	tags=36%, list=13%, signal=32%	ABCA7/ABCA2/ABCC4/ABCG1/ABCD4/ABCA10/ABCG2/ABCB1/ABCC3/ABCC9/ABCA6/ABCA9/CFTR/ABCA3/ABCA8/ABCC6
Proximal tubule bicarbonate reclamation	Proximal tubule bicarbonate reclamation	Proximal tubule bicarbonate reclamation	23	-0.533216	-1.73479	0.00880438024003847	0.00880438024003847	0.00747740427084607	4530	tags=35%, list=8%, signal=32%	GLS/ATP1B1/CA2/SLC4A4/ATP1B2/CA4/AQP1/ATP1A2
Chronic myeloid leukemia	Chronic myeloid leukemia	Chronic myeloid leukemia	73	0.454879657621376	1.60898007633189	0.00930449736512851	0.00930449736512851	0.00781335674658929	6500	tags=32%, list=11%, signal=28%	E2F2/E2F1/E2F3/HDAC2/HDAC1/CDK4/NRAS/MAP2K1/CDKN2A/CRKL/CDK6/AKT2/CBLC/PIK3CB/PIK3CA/HRAS/SMAD3/PTPN11/SOS1/CHUK/CBLB/MYC/KRAS
Selenoamino acid metabolism	Selenoamino acid metabolism	Selenoamino acid metabolism	26	0.567252822875122	1.66935788612752	0.0100974961727412	0.0100974961727412	0.00838505530134066	6771	tags=50%, list=12%, signal=44%	MARS1/SEPHS1/AHCY/LCMT2/MARS2/TRMT11/METTL6/CBS/SCLY/BUD23/LCMT1/METTL2B/SEPHS2
Other glycan degradation	Other glycan degradation	Other glycan degradation	16	-0.589222	-1.75928	0.0106489004861688	0.0106489004861688	0.00874577136515891	6609	tags=62%, list=12%, signal=55%	MAN2C1/ENGASE/MANBA/HEXA/AGA/MAN2B1/HEXB/GLB1/FUCA1/MAN2B2
Renal cell carcinoma	Renal cell carcinoma	Renal cell carcinoma	70	0.439029565217226	1.54687280746159	0.0127386976355006	0.0127386976355006	0.0102900920730176	4174	tags=29%, list=7%, signal=27%	SLC2A1/CUL2/NRAS/PAK2/MAP2K1/FH/EGLN3/PAK1/PAK6/ELOC/CRKL/HIF1A/AKT2/EGLN1/PIK3CB/PIK3CA/HRAS/PGF/PTPN11/SOS1
Tyrosine metabolism	Tyrosine metabolism	Tyrosine metabolism	42	-0.423195	-1.55655	0.0128848445155883	0.0128848445155883	0.0102900920730176	3657	tags=29%, list=6%, signal=27%	COMT/TYRP1/NAA80/AOX1/PNMT/ADH1A/HEMK1/MAOB/MAOA/AOC3/ALDH3B1/ADH1B
Valine, leucine and isoleucine biosynthesis	Valine, leucine and isoleucine biosynthesis	Valine, leucine and isoleucine biosynthesis	11	0.696073133825846	1.64648709313942	0.0129423270721194	0.0129423270721194	0.0102900920730176	4040	tags=55%, list=7%, signal=51%	IARS1/VARS1/PDHA1/LARS1/IARS2/LARS2
Glycosylphosphatidylinositol(GPI)-anchor biosynthesis	Glycosylphosphatidylinositol(GPI)-anchor biosynthesis	Glycosylphosphatidylinositol(GPI)-anchor biosynthesis	24	0.562028558246785	1.61816837426513	0.0150045871486498	0.0150045871486498	0.0118041627429821	7470	tags=42%, list=13%, signal=36%	PIGX/PIGU/PIGW/PIGC/PIGO/PIGF/PIGS/PGAP1/PIGN/PIGH
Cardiac muscle contraction	Cardiac muscle contraction	Cardiac muscle contraction	79	-0.339079	-1.43441	0.0158076834552214	0.0158076834552214	0.0123064202337798	6565	tags=32%, list=12%, signal=28%	COX7C/SLC9A1/SLC8A1/CACNA2D4/CACNG4/MT-CO2/CACNA1S/CACNA1F/MT-CO3/RYR2/ATP1B1/CACNG6/CACNB4/MT-CO1/CACNA1C/MT-CYB/MYL3/CACNB1/CACNA1D/ATP1B2/COX4I2/COX7A1/ATP1A2/TNNC1/CACNA2D2
Peroxisome	Peroxisome	Peroxisome	78	-0.337543	-1.4308	0.0168260499994495	0.0168260499994495	0.0129641839388054	8105	tags=37%, list=14%, signal=32%	ABCD3/PEX11B/ECI2/ACSL4/ACOX1/ACOX3/CRAT/PECR/GSTK1/PMVK/ABCD4/PHYH/NUDT12/DAO/BAAT/HMGCL/PRDX5/PEX11G/EPHX2/DDO/SCP2/ACSL1/MLYCD/HSD17B4/ACSL5/CAT/PXMP4/ACOX2/ACAA1
Retinol metabolism	Retinol metabolism	Retinol metabolism	64	-0.352028	-1.43446	0.0178713655307833	0.0178713655307833	0.0136290757538734	10584	tags=38%, list=19%, signal=31%	UGT2B11/ADH6/CYP2A7/CYP2C9/CYP2A13/UGT2B4/CYP2C8/DGAT1/BCO1/UGT2B15/DHRS3/DHRS4L2/CYP1A1/CYP4A22/ALDH1A2/CYP2A6/CYP4A11/CYP3A5/AWAT2/CYP1A2/CYP3A7/ADH1A/RETSAT/ADH1B
Melanogenesis	Melanogenesis	Melanogenesis	101	-0.312715	-1.38613	0.0186120280968971	0.0186120280968971	0.0140505475266315	6124	tags=29%, list=11%, signal=26%	KITLG/WNT9A/FZD8/KIT/CREB3L2/PRKCB/PRKCA/WNT9B/CAMK2D/CALM1/WNT2/CAMK2A/ADCY6/ADCY7/MAPK3/TYRP1/WNT7A/TCF7L2/FZD5/MITF/EDN1/GNAI2/PLCB2/FZD4/CREB3L1/GNAQ/ADCY9/ADCY4/EDNRB
VEGF signaling pathway	VEGF signaling pathway	VEGF signaling pathway	76	-0.336271	-1.41205	0.0199074603014889	0.0199074603014889	0.0148782071726917	6255	tags=32%, list=11%, signal=28%	PXN/NFATC1/RAC2/PLCG2/PIK3CG/PRKCB/CHP1/PRKCA/PPP3CA/PLA2G2A/PPP3CC/NFATC2/NOS3/MAPK3/PIK3R5/PLA2G12A/PLA2G2C/PLA2G12B/SHC2/KDR/PLA2G5/MAPKAPK3/PLA2G10/PLA2G1B
Adipocytokine signaling pathway	Adipocytokine signaling pathway	Adipocytokine signaling pathway	66	-0.340698	-1.39997	0.0202863209652081	0.0202863209652081	0.0150112432363708	7580	tags=36%, list=13%, signal=32%	PRKCQ/ACSL4/PRKAG2/MAPK10/PPARGC1A/G6PC2/CAMKK1/STAT3/TNFRSF1A/RXRA/MAPK9/TNFRSF1B/SOCS3/IRS2/ACSL1/ACACB/TRADD/PRKAB1/NFKBIA/LEPR/CD36/RXRG/ACSL5/AGRP
Natural killer cell mediated cytotoxicity	Natural killer cell mediated cytotoxicity	Natural killer cell mediated cytotoxicity	132	-0.286873	-1.32985	0.0222041524870637	0.0222041524870637	0.0162692964559497	8851	tags=38%, list=16%, signal=32%	KIR2DS4/PRF1/FCGR3B/MICA/PIK3R1/LCP2/SOS2/CD244/FAS/NFAT5/VAV1/FCGR3A/NCR3/HLA-B/IFNAR1/HLA-C/FYN/NFATC1/RAC2/IFNAR2/PLCG2/PIK3CG/IFNGR1/SH2D1B/PRKCB/FCER1G/CHP1/PTPN6/KIR3DL1/PRKCA/TNFRSF10B/PTK2B/ARAF/PPP3CA/PPP3CC/NFATC2/TNFRSF10D/ITGB2/MAPK3/ITGAL/HCST/CSF2/PIK3R5/TYROBP/ICAM1/SHC2/ICAM2/HLA-E/TNFRSF10C/SHC3
Alanine, aspartate and glutamate metabolism	Alanine, aspartate and glutamate metabolism	Alanine, aspartate and glutamate metabolism	32	0.504813645505234	1.54095525863306	0.0235961566813817	0.0235961566813817	0.017121380933859	5833	tags=34%, list=10%, signal=31%	PPAT/CAD/NIT2/ADSL/ADSS2/GOT2/GOT1/GAD1/IL4I1/GPT2/ASNS
Circadian rhythm - mammal	Circadian rhythm - mammal	Circadian rhythm - mammal	13	-0.604599	-1.72153	0.0247197685272528	0.0247197685272528	0.0177642061278841	8878	tags=54%, list=16%, signal=45%	PER3/BHLHE40/CSNK1D/BHLHE41/PER2/PER1/CRY2
Axon guidance	Axon guidance	Axon guidance	129	-0.286437	-1.32045	0.0286128181487265	0.0286128181487265	0.0203660159254094	6485	tags=29%, list=11%, signal=25%	LRRC4C/FYN/NFATC1/RAC2/SEMA6B/EFNB2/ABLIM1/CHP1/SEMA4G/PPP3CA/PPP3CC/NFATC2/CFL2/NTNG1/UNC5C/ARHGEF12/MAPK3/EPHA3/FES/CXCL12/RHOA/SEMA3E/SEMA5A/PLXNA2/EFNA1/NRP1/GNAI2/RGS3/ROBO2/SLIT2/ABLIM3/RND1/NTN4/SEMA3G/SLIT3/DPYSL2/SEMA3B
Histidine metabolism	Histidine metabolism	Histidine metabolism	29	-0.451911	-1.54453	0.0310163369677286	0.0310163369677286	0.0218685196098186	3082	tags=31%, list=5%, signal=29%	ALDH3A2/HDC/HEMK1/MAOB/HNMT/MAOA/ASPA/ALDH2/ALDH3B1
Sphingolipid metabolism	Sphingolipid metabolism	Sphingolipid metabolism	39	-0.393409	-1.44042	0.0316267626745734	0.0316267626745734	0.0220905081150488	5702	tags=38%, list=10%, signal=35%	DEGS2/SGPP2/SGMS1/PLPP1/SMPD3/SPTLC2/SGPP1/ARSA/GALC/GLB1/PLPP3/GAL3ST1/SMPD1/SGMS2/ASAH1
Phosphatidylinositol signaling system	Phosphatidylinositol signaling system	Phosphatidylinositol signaling system	76	-0.326883	-1.37263	0.0327172185887806	0.0327172185887806	0.0226405703684544	6252	tags=33%, list=11%, signal=29%	INPP5J/INPP5D/PTEN/PLCG2/ITPR2/PIK3CG/ITPKB/CDS2/PIK3C2B/PRKCB/PIP5K1C/PRKCA/ITPK1/CALM1/CDIPT/PLCE1/PIK3R5/DGKD/INPP5A/ITPR1/PLCD1/CDS1/PLCB2/PIP5K1B/INPP5K
ErbB signaling pathway	ErbB signaling pathway	ErbB signaling pathway	87	0.388547227662724	1.40832600036838	0.0351758793969849	0.0351758793969849	0.0241186618752866	11057	tags=41%, list=19%, signal=33%	EIF4EBP1/NRAS/PAK2/ELK1/MAP2K1/PAK1/PAK6/MTOR/NCK1/GSK3B/CRKL/RPS6KB2/RPS6KB1/AKT2/CBLC/MAPK8/PIK3CB/PIK3CA/HRAS/SOS1/CAMK2B/NRG4/CBLB/PAK4/MYC/KRAS/CDKN1B/PRKCG/SHC1/SRC/CBL/GRB2/TGFA/PTK2/PAK5/PLCG1
Bladder cancer	Bladder cancer	Bladder cancer	42	0.467761124758478	1.51946319052478	0.0384511247447825	0.0384511247447825	0.0261246876256417	6500	tags=33%, list=11%, signal=30%	E2F2/E2F1/E2F3/CDK4/NRAS/MAP2K1/CDKN2A/MMP1/HRAS/MMP9/PGF/CXCL8/MYC/KRAS
Non-small cell lung cancer	Non-small cell lung cancer	Non-small cell lung cancer	54	0.424200160152707	1.43247668149684	0.0394736842105263	0.0394736842105263	0.0265778243617579	4174	tags=24%, list=7%, signal=22%	E2F2/E2F1/E2F3/CDK4/NRAS/MAP2K1/CDKN2A/CDK6/AKT2/PIK3CB/PIK3CA/HRAS/SOS1
Glutathione metabolism	Glutathione metabolism	Glutathione metabolism	49	0.43775937205035	1.45347537671394	0.0418918918918919	0.0418918918918919	0.0279541759804918	6476	tags=31%, list=11%, signal=27%	RRM2/RRM1/IDH2/GSS/SMS/SRM/GCLC/GPX7/GGCT/GCLM/TXNDC12/PGD/G6PD/GSR/GPX2
TGF-beta signaling pathway	TGF-beta signaling pathway	TGF-beta signaling pathway	86	-0.29934	-1.28867	0.0471121049586001	0.0471121049586001	0.0311593800844025	7202	tags=34%, list=13%, signal=30%	TGFB2/ID3/SMURF2/ID2/INHBB/CHRD/GDF7/TGFB1/THBS3/NOG/BMP4/ID1/AMHR2/MAPK3/DCN/BMP6/RHOA/SMAD9/ID4/BMPR2/RBL2/PPP2CB/BMP5/SMAD7/BMP2/SMAD6/ACVRL1/LEFTY2/TGFBR2
Colorectal cancer	Colorectal cancer	Colorectal cancer	62	0.406923638395616	1.40380894621538	0.0481770833333333	0.0481770833333333	0.0315842374576793	6500	tags=29%, list=11%, signal=26%	MSH2/BIRC5/MSH6/CASP3/CYCS/MAP2K1/RAC3/GSK3B/AKT2/MAPK8/PIK3CB/PIK3CA/LEF1/SMAD3/BCL2/MSH3/MYC/KRAS
Long-term potentiation	Long-term potentiation	Long-term potentiation	70	-0.308739	-1.27651	0.0497563760047377	0.0497563760047377	0.0323359514538799	5660	tags=30%, list=10%, signal=27%	ITPR2/PRKCB/CHP1/PRKCA/ARAF/CAMK2D/CALM1/PPP3CA/PPP3CC/CAMK2A/MAPK3/RAP1A/RPS6KA3/RPS6KA1/CACNA1C/ITPR1/PLCB2/GNAQ/GRIA1/RAPGEF3/RPS6KA2
