# Supplementary material for: Exploring the mechanism of prognostic genes associated with neuroendocrine differentiation and immunotherapy resistance in non-small cell lung cancer based on the bulk transcriptome and single cell RNA sequencing
Source: Research Square preprint supplement (doi:10.21203/rs.3.rs-8816614/v1), 2026-02-16
Supplement: Supplementary file 6 [file c7494f1b208e6e84cee39765.xlsx]

## Sheet: GSEA_res
	ID	Description	setSize	enrichmentScore	NES	pvalue	p.adjust	qvalue	rank	leading_edge	core_enrichment
KEGG_CELL_CYCLE	KEGG_CELL_CYCLE	KEGG_CELL_CYCLE	125	0.57974838865271	2.29410160240421	8.19838796377926e-10	1.52490016126294e-07	1.31174207420468e-07	8571	tags=66%, list=29%, signal=47%	CCNE1/CCNA1/CDC20/CCNB1/CDC45/PKMYT1/CDC25C/CCNA2/MAD2L1/MCM2/PLK1/CDK1/CDC6/TTK/CCNB3/BUB1/BUB1B/CCNB2/ORC1/CDC25A/CDKN2A/ESPL1/CHEK1/SFN/CDK6/MYC/PTTG1/ORC6/MCM7/DBF4/MAD1L1/CDK4/MCM4/PCNA/MCM6/MAD2L2/HDAC2/MCM5/SMC1B/CDK2/SKP2/E2F3/ORC5/GADD45A/BUB3/TFDP1/CDC7/YWHAG/E2F2/MCM3/YWHAZ/ANAPC11/RBL1/YWHAQ/PRKDC/YWHAE/E2F1/CHEK2/WEE2/SMC3/RBX1/TGFB2/CDKN2D/RAD21/CDKN1A/ORC3/ANAPC5/STAG1/CDKN1C/ANAPC…
KEGG_RIBOSOME	KEGG_RIBOSOME	KEGG_RIBOSOME	88	0.577748035976377	2.13685200979674	1.84760669871918e-07	1.71827422980883e-05	1.47808535897534e-05	10413	tags=78%, list=36%, signal=51%	RPS16/RPL22L1/MRPL13/RPS19/RPS5/RPS18/RPS7/RPL35A/RPL35/RPS4Y1/RPL18A/RPLP0/RPS12/RPL24/RPL27/RPSA/RPS26/RPL3L/RPS27A/RPL38/RPL36/RPS2/RPL6/RPS29/RPL32/RPL41/RPL17/RPS11/RPL8/RPL9/RPL39/RPL18/RPL26L1/UBA52/RPS3A/RPS3/RPS15/RPL27A/RPL7A/RSL24D1/RPL19/RPS21/RPL29/RPL13A/RPS20/RPL12/RPL23A/RPL5/RPL28/RPL4/RPL10L/RPL30/RPL21/RPL26/RPS13/RPL31/RPL37A/RPS8/RPL7/RPS28/FAU/RPLP1/RPS9/RPL23/RPL37/RPS15A/R…
KEGG_DNA_REPLICATION	KEGG_DNA_REPLICATION	KEGG_DNA_REPLICATION	36	0.719670744279935	2.23145480092371	1.97374275522694e-06	0.00012237205082407	0.00010526628027877	6823	tags=78%, list=23%, signal=60%	MCM2/RFC4/PRIM1/RFC3/MCM7/MCM4/POLE2/FEN1/PCNA/MCM6/MCM5/PRIM2/RFC2/RFC5/POLD1/RPA3/SSBP1/DNA2/POLE4/POLD2/LIG1/MCM3/POLE3/RNASEH2A/POLE/RPA1/POLA1/POLA2
KEGG_PATHWAYS_IN_CANCER	KEGG_PATHWAYS_IN_CANCER	KEGG_PATHWAYS_IN_CANCER	324	0.364241508614338	1.60368958694461	1.75554093248009e-05	0.00081632653360324	0.000702216372992034	6420	tags=31%, list=22%, signal=24%	FGF4/FGF3/FGF19/WNT7A/VEGFC/LAMA1/LAMC2/CTNNA2/CCNE1/CCNA1/WNT16/KLK3/WNT10B/FGF5/WNT6/WNT10A/ITGA6/BIRC5/COL4A6/MMP9/PRKCG/FGF23/LAMB4/BIRC3/RAD51/LAMA3/FGF12/CDKN2A/CKS1B/SLC2A1/CDK6/MMP1/FADD/MYC/GLI1/TGFA/FGF16/CDK4/IGF1/MET/NKX3-1/LAMB3/HDAC2/FGF20/AKT2/PTGS2/EGLN3/PPARG/CYCS/WNT11/FZD7/LEF1/CDK2/SKP2/SMO/E2F3/GLI3/BRCA2/BID/RAC2/MSH6/FGF8/TFG/CBLC/NRAS/E2F2/NFKB2/AKT3/CXCL8/FN1/MSH2/WNT1/HI…
KEGG_PROTEASOME	KEGG_PROTEASOME	KEGG_PROTEASOME	46	0.625971751418165	2.00645392156416	6.45424416583716e-05	0.00240097882969142	0.00206535813306789	8457	tags=80%, list=29%, signal=57%	IFNG/PSMB9/PSMD8/PSMC4/PSMD2/PSMD14/PSMB1/PSMC2/PSMB11/SEM1/POMP/PSMB7/PSMB6/PSMB8/PSMA4/PSMA6P4/PSMB3/PSMA5/PSMA7/PSMC1P4/PSMB5/PSMD11/PSMB2/PSME3/PSMD13/PSMC6/PSMD3/PSMD7/PSMD1/PSME2/PSMC3/PSMD12/PSMB4/PSMA1/PSMB10/PSME4/PSMA3
KEGG_SPLICEOSOME	KEGG_SPLICEOSOME	KEGG_SPLICEOSOME	127	0.451506721394691	1.78194487281425	0.000101078282439664	0.00313342675562958	0.00269542086505771	9198	tags=50%, list=32%, signal=34%	HSPA2/SNRPG/SNRPD2/HSPA6/SNRPB/ALYREF/PPIL1/SNRPD1/HSPA1A/BUD31/MAGOHB/SNRPF/PHF5A/LSM2/HNRNPA1P60/SNRPA1/SNRPE/SF3B6/WBP11/U2SURP/SF3B5/LSM5/LSM4/THOC3/SNRPC/NCBP2/LSM3/LSM6/HSPA1B/SMNDC1/PRPF4/SNRPA/EIF4A3/EFTUD2/SRSF9/PRPF19/SNRNP40/ISY1/USP39/SNU13/NCBP1/PUF60/TRA2B/MAGOH/LSM7/SNRNP27/HNRNPC/HSPA8/CTNNBL1/SNRPB2/BCAS2/PCBP1/PPIH/HNRNPK/U2AF2/SRSF7/SRSF3/CDC40/HNRNPM/PRPF40A/HNRNPA1/PRPF31/DDX…
KEGG_P53_SIGNALING_PATHWAY	KEGG_P53_SIGNALING_PATHWAY	KEGG_P53_SIGNALING_PATHWAY	68	0.516064165244926	1.8041991603047	0.000321764343343583	0.00854973826598664	0.00735461356213905	3994	tags=32%, list=14%, signal=28%	CCNE1/SERPINE1/CCNB1/SERPINB5/PMAIP1/CDK1/TP53AIP1/CCNB3/CCNB2/CDKN2A/CHEK1/SFN/CDK6/PERP/RRM2/GTSE1/CDK4/IGF1/CYCS/CDK2/GADD45A/BID
KEGG_MISMATCH_REPAIR	KEGG_MISMATCH_REPAIR	KEGG_MISMATCH_REPAIR	23	0.687926015840967	1.94545860703329	0.000386461327470861	0.00898522586369752	0.00772922654941722	4908	tags=57%, list=17%, signal=47%	EXO1/RFC4/RFC3/PCNA/RFC2/RFC5/POLD1/RPA3/SSBP1/MSH6/POLD2/LIG1/MSH2
KEGG_PARKINSONS_DISEASE	KEGG_PARKINSONS_DISEASE	KEGG_PARKINSONS_DISEASE	115	0.438242483133545	1.71810853784657	0.000619769952226628	0.0128085790126837	0.011018132484029	10374	tags=66%, list=36%, signal=43%	TH/COX7B2/UCHL1/UQCRFS1/NDUFA4L2/VDAC3/SLC25A31/COX8C/CYCS/CYC1/NDUFB5/COX6B1/COX6B2/NDUFB4/COX5B/ATP5F1B/ATP5MC3/UQCRH/COX7A2/COX7B/VDAC2/ATP5MC1/VDAC1/NDUFA9/COX5A/SLC25A5/NDUFB7/UQCRHL/COX7A2L/UBE2L3/NDUFB6/UQCRC1/ATP5PB/COX6A1/UBE2L6/PPID/ATP5MC2/COX8A/ATP5MC1P5/NDUFS6/UQCR11/UBE2G1/NDUFA8/SDHB/NDUFA6/SLC25A6/ATP5F1C/NDUFB3/ATP5PD/NDUFB9/PRKN/NDUFAB1/CASP9/SDHC/NDUFA4/UQCRQ/COX7A1/HTRA2/ATP5P…
KEGG_MELANOMA	KEGG_MELANOMA	KEGG_MELANOMA	70	0.492466372216575	1.73527807335936	0.0010075350322983	0.0187401516007483	0.0161205605167728	4557	tags=27%, list=16%, signal=23%	FGF4/FGF3/FGF19/FGF5/FGF23/FGF12/CDKN2A/CDK6/FGF16/CDK4/IGF1/MET/FGF20/AKT2/E2F3/FGF8/NRAS/E2F2/AKT3
KEGG_OXIDATIVE_PHOSPHORYLATION	KEGG_OXIDATIVE_PHOSPHORYLATION	KEGG_OXIDATIVE_PHOSPHORYLATION	117	0.426013850969843	1.66599350991572	0.00135118647890283	0.0228473350069023	0.0196536215113138	10091	tags=56%, list=35%, signal=36%	COX7B2/ATP4A/UQCRFS1/NDUFA4L2/COX8C/ATP5MF/CYC1/NDUFB5/COX6B1/COX6B2/NDUFB4/COX5B/ATP5F1B/ATP5MC3/UQCRH/ATP6V1B1/COX7A2/COX7B/ATP5MC1/NDUFA9/COX5A/ATP6V1F/COX17/ATP6V1E2/NDUFB7/UQCRHL/COX7A2L/NDUFB6/UQCRC1/ATP5PB/COX6A1/ATP5MC2/COX8A/ATP5MC1P5/NDUFS6/UQCR11/NDUFA8/SDHB/NDUFA6/ATP5F1C/NDUFB3/ATP6V0B/ATP5PD/NDUFB9/NDUFAB1/SDHC/NDUFA4/UQCRQ/COX10/COX7A1/ATP6V1A/ATP5PF/ATP5F1A/ATP5F1D/NDUFA1/SDHD/ATP…
KEGG_OLFACTORY_TRANSDUCTION	KEGG_OLFACTORY_TRANSDUCTION	KEGG_OLFACTORY_TRANSDUCTION	162	0.371473888711352	1.49607293507131	0.00156249783491739	0.0242187164412196	0.0208333044655653	4452	tags=33%, list=15%, signal=28%	OR2L2/CALML5/OR2W3/OR14A16/OR2L13/GUCA1C/OR1F1/OR7A5/OR4C6/OR51Q1/OR2V2/OR56A3/OR52A1/OR2G6/OR8D1/OR6C2/OR51B4/OR10A3/OR51E2/OR51B5/OR52E2/OR51E1/OR2L3/OR51I1/OR2T8/OR7C1/OR2B6/OR2C3/OR8A1/OR13H1/OR56A4/OR51M1/OR10A6/OR6C70/OR2H2/OR56A5/OR1J4/CLCA2/OR7D2/CALML3/OR5T2/OR9Q1/OR10H1/OR10S1/OR5AU1/OR52L1/OR8G1/OR8G5/OR2A4/OR3A3/OR1J1/OR52D1/OR51B2/OR11H4
KEGG_HOMOLOGOUS_RECOMBINATION	KEGG_HOMOLOGOUS_RECOMBINATION	KEGG_HOMOLOGOUS_RECOMBINATION	28	0.591488113713436	1.72866029847169	0.00284558091979769	0.0378097055617824	0.0325244779026085	6468	tags=50%, list=22%, signal=39%	RAD51/XRCC2/BLM/RAD54L/EME1/POLD1/BRCA2/RPA3/SSBP1/POLD2/SEM1/NBN/RAD54B/RPA1
KEGG_OOCYTE_MEIOSIS	KEGG_OOCYTE_MEIOSIS	KEGG_OOCYTE_MEIOSIS	110	0.398991272801925	1.54686736180057	0.00284589181647824	0.0378097055617824	0.0325244779026085	7133	tags=39%, list=25%, signal=30%	CALML5/ADCY8/CCNE1/CDC20/CCNB1/AURKA/PKMYT1/SGO1/CDC25C/MAD2L1/PLK1/CDK1/BUB1/CCNB2/ESPL1/FBXO5/PTTG1/FBXO43/IGF1/MAD2L2/CALML3/SMC1B/MAPK12/CDK2/CPEB1/YWHAG/YWHAZ/ADCY5/ANAPC11/PPP1CC/YWHAQ/IGF1R/YWHAE/ADCY3/PRKX/SMC3/RBX1/PPP3R1/CALM3/PPP1CA/PPP2R1A/CHP2/ANAPC5
